# Supplementary material for: Inositol polyphosphate multikinase physically binds to the SWI/SNF complex and modulates BRG1 occupancy in mouse embryonic stem cells
Source: eLife journal article supplement (doi:10.7554/elife.73523), 2022-04-27

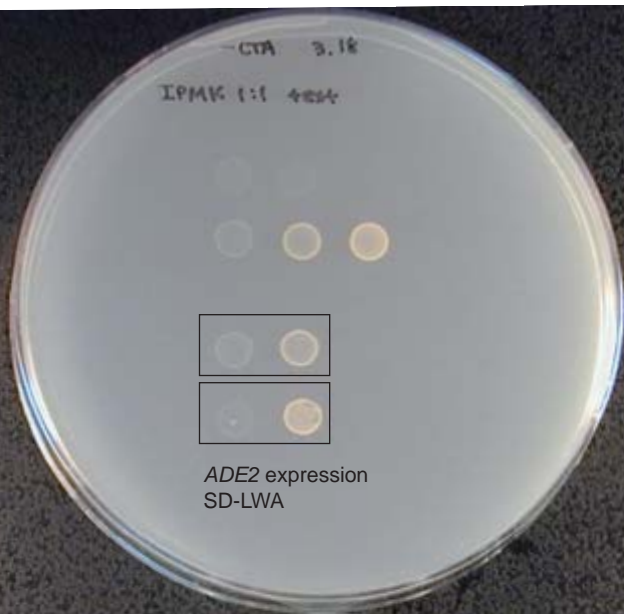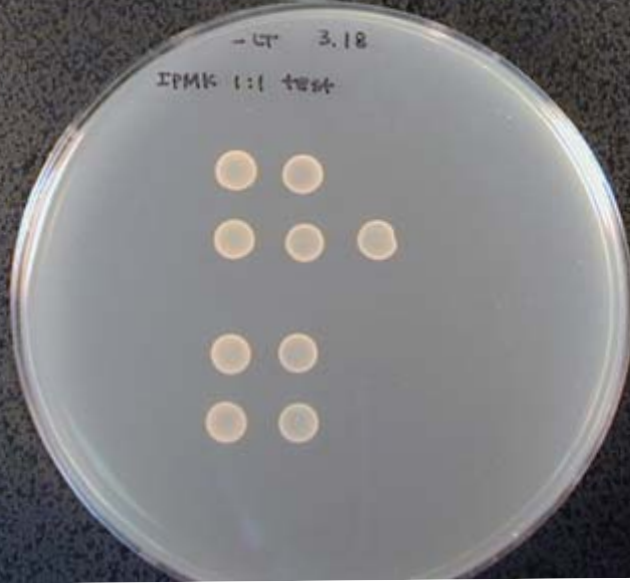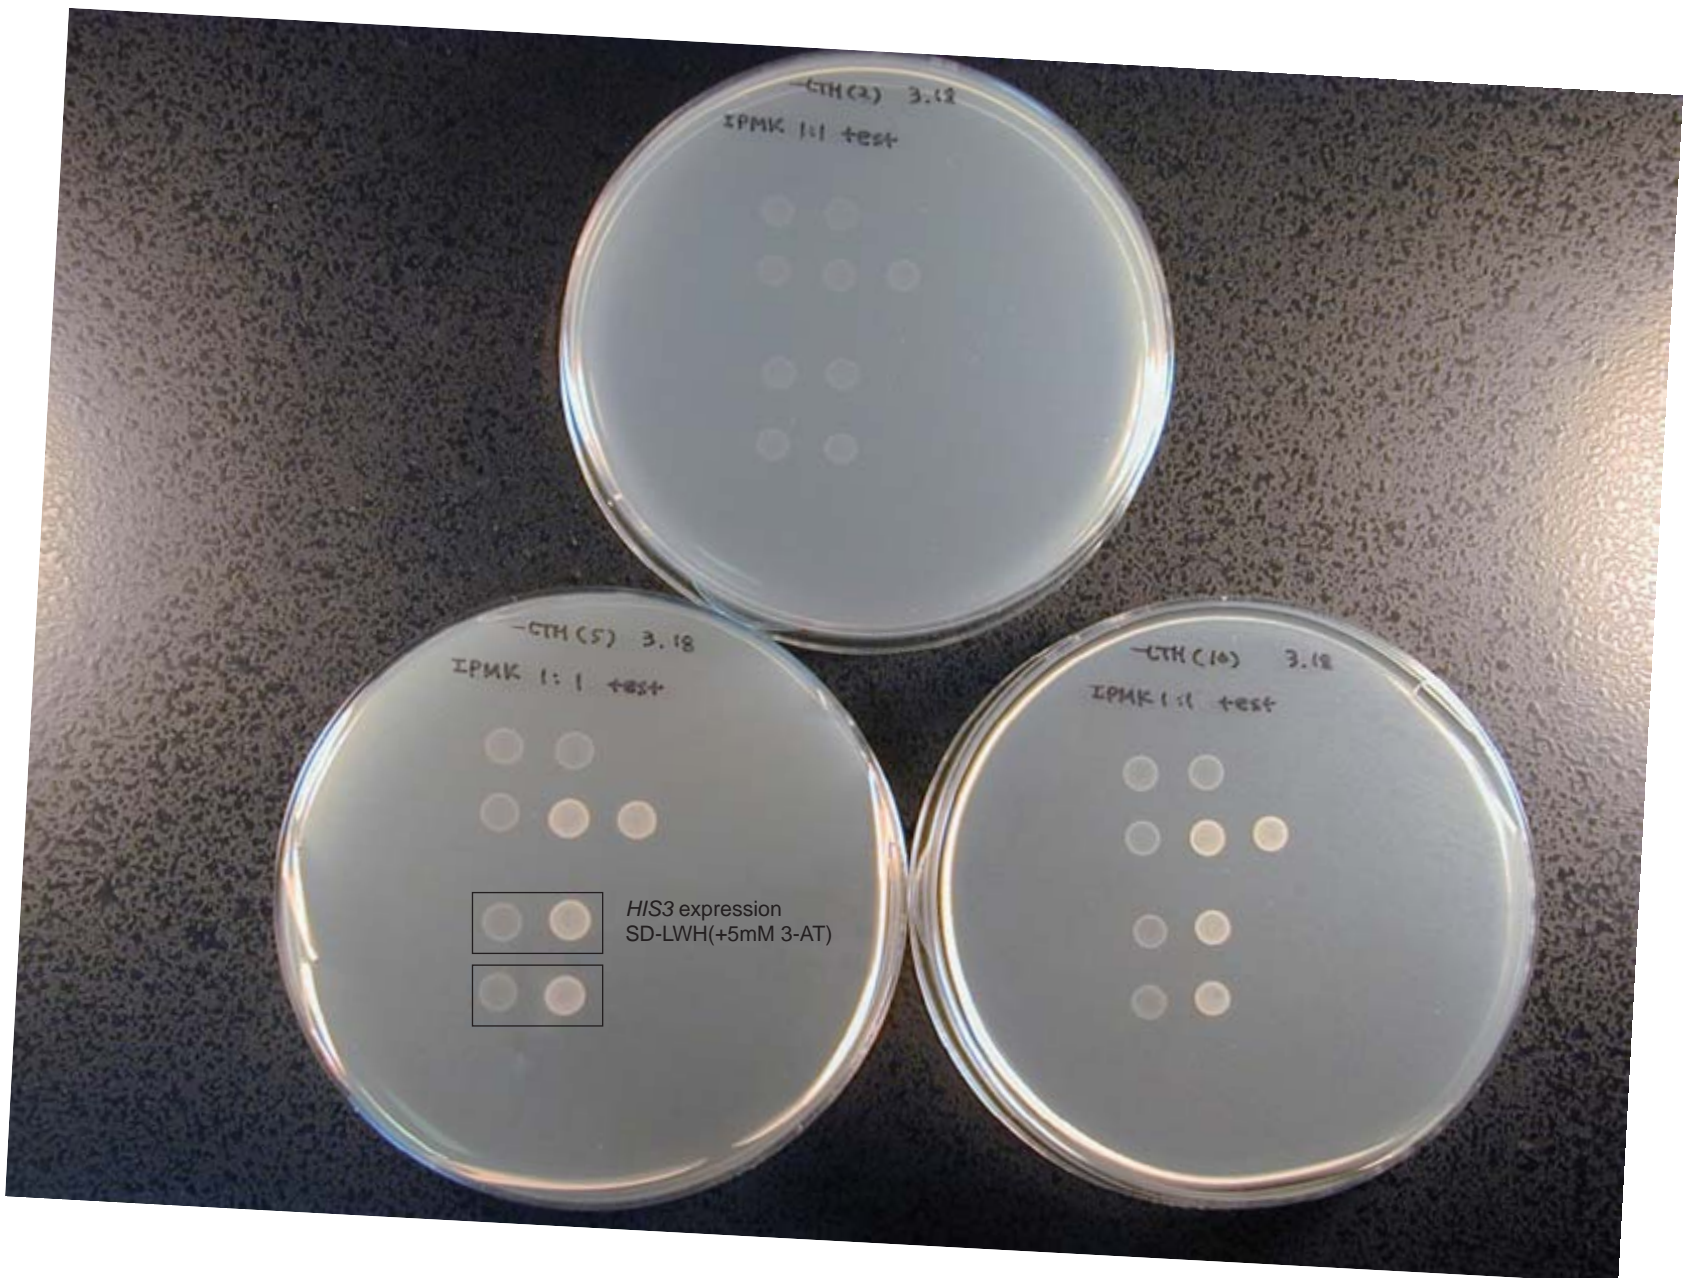

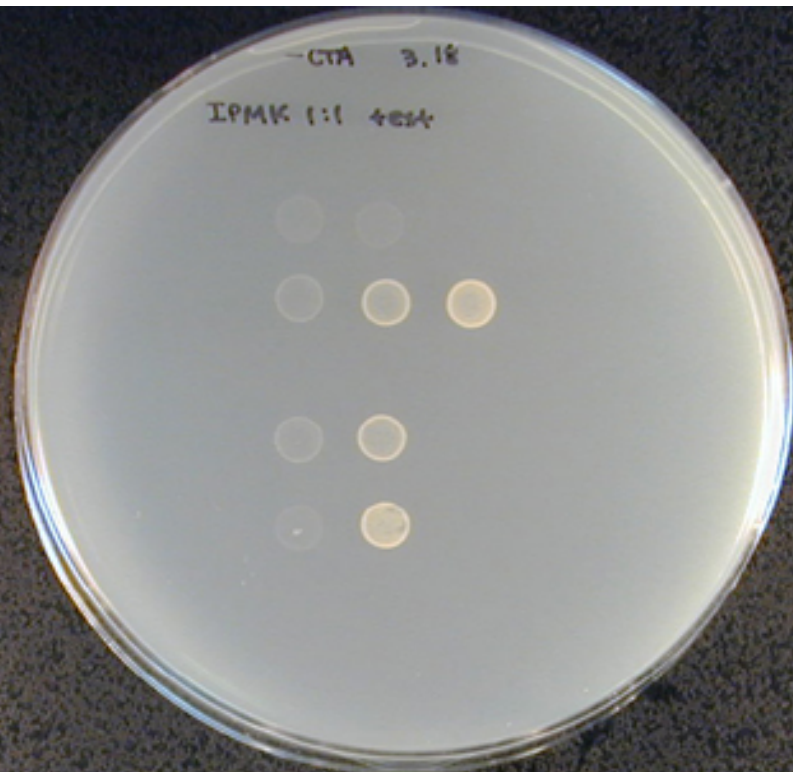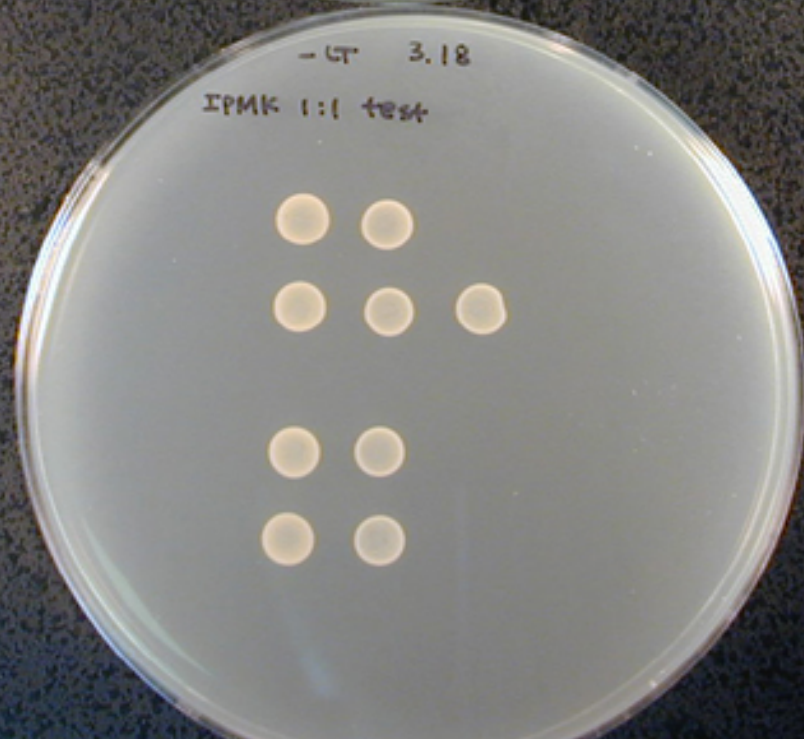

-CTH(2) 3.18  
IPMK 1:1 test

-CTH(5) 3.18  
IPMK 1:1 test

-CTH(10) 3.18  
IPMK 1:1 test

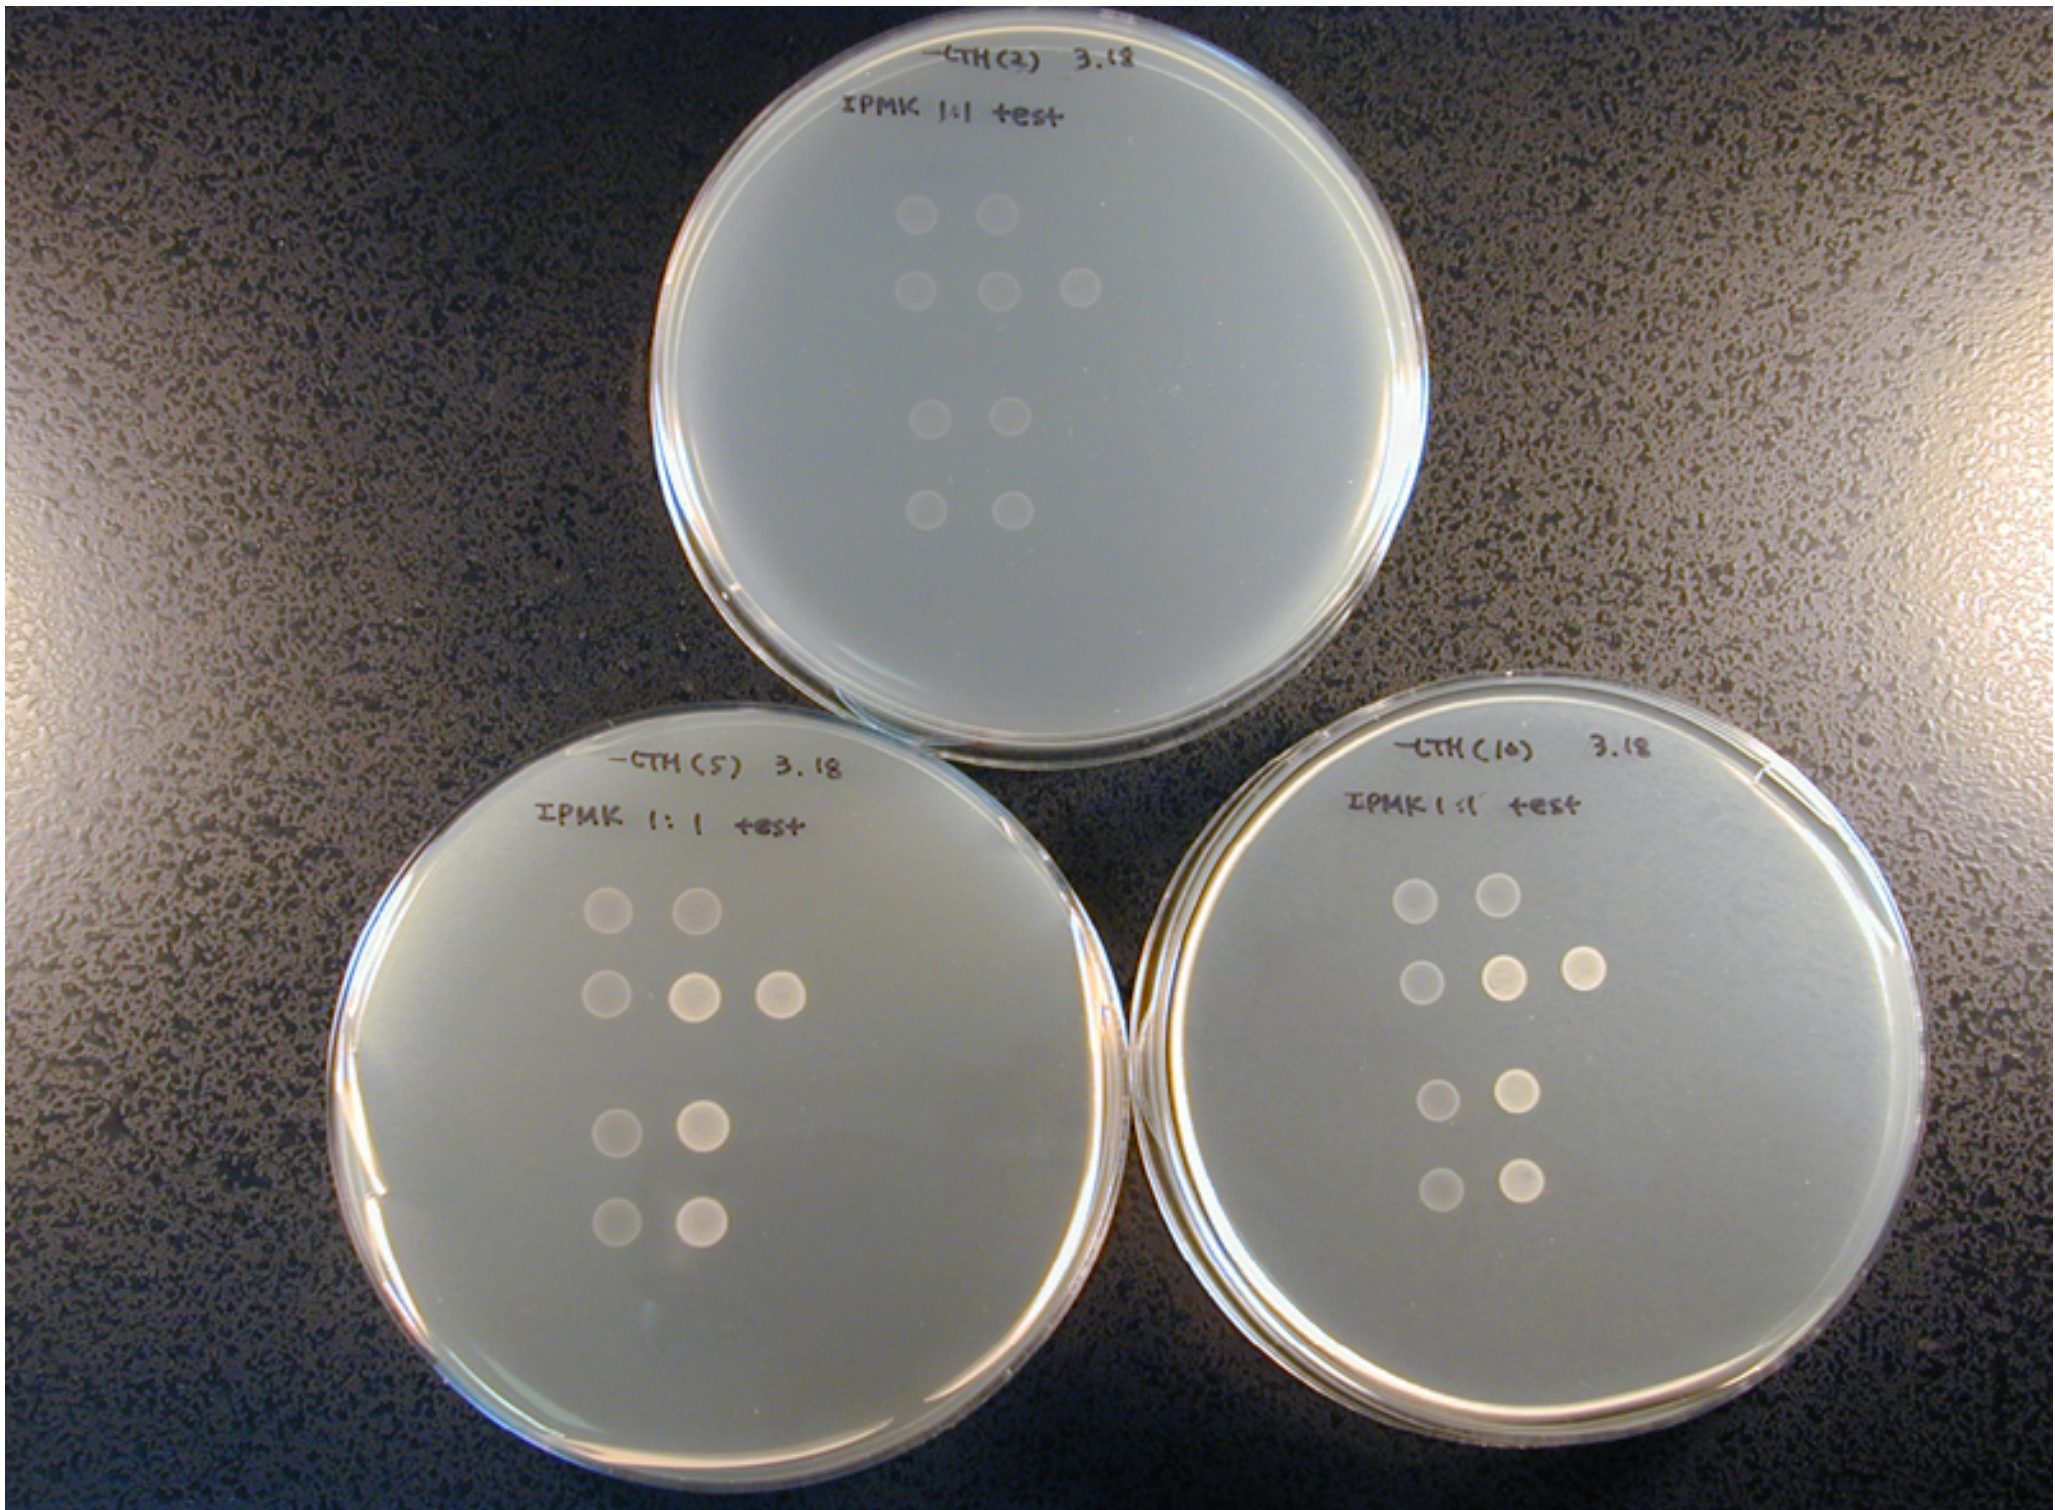

Supplement: fig1-data1 [file elife-73523-fig1-data1-v2.pdf]
