# Supplementary material for: Inositol polyphosphate multikinase physically binds to the SWI/SNF complex and modulates BRG1 occupancy in mouse embryonic stem cells
Source: eLife journal article supplement (doi:10.7554/elife.73523), 2022-04-27
Supplement: fig3-data2 [file elife-73523-fig3-data2-v1.zip]

C

FLAG-IPMK

GST GST-105-244 GST-259-378 GST-186-378 GST-1-385

IP :  
FLAG

GST

IP :  
FLAG

FLAG

Input

GST
