# Supplementary material for: Inositol polyphosphate multikinase physically binds to the SWI/SNF complex and modulates BRG1 occupancy in mouse embryonic stem cells
Source: eLife journal article supplement (doi:10.7554/elife.73523), 2022-04-27
Supplement: fig3-figsupp1-data2 [file elife-73523-fig3-figsupp1-data2-v1.zip]

B

GST GST-186-210 GST-211-244 GST-186-244 GST-1-385

IP :  
FLAG

GST

IP :  
FLAG

FLAG

Input

GST
