# Supplementary material for: Inositol polyphosphate multikinase physically binds to the SWI/SNF complex and modulates BRG1 occupancy in mouse embryonic stem cells
Source: eLife journal article supplement (doi:10.7554/elife.73523), 2022-04-27
Supplement: fig4-figsupp1-data2 [file elife-73523-fig4-figsupp1-data2-v1.zip]

| Cytoplasm |        | Nucleoplasm |        | Chromatin |        |
|-----------|--------|-------------|--------|-----------|--------|
| siEgfp    | silpmk | siEgfp      | silpmk | siEgfp    | silpmk |

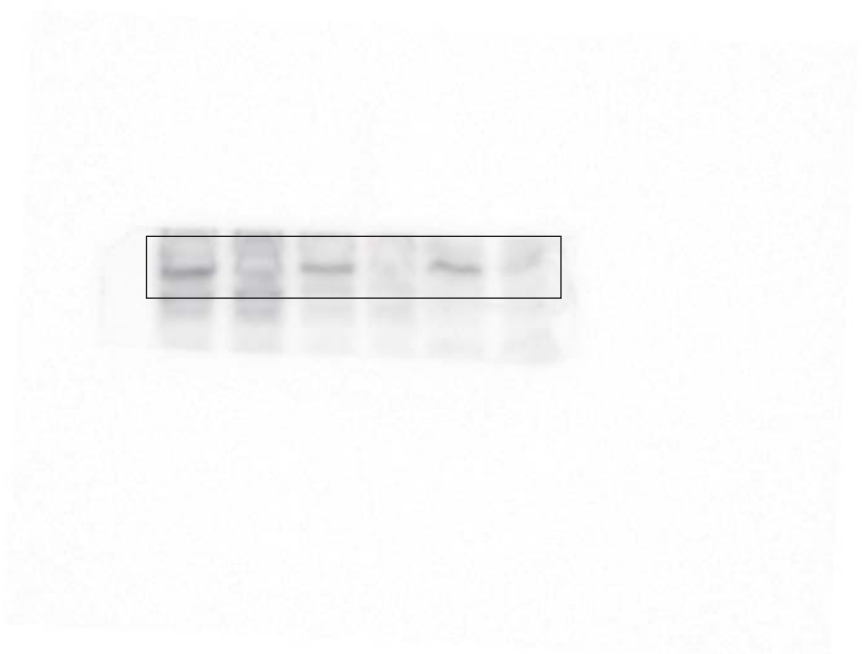

IPMK

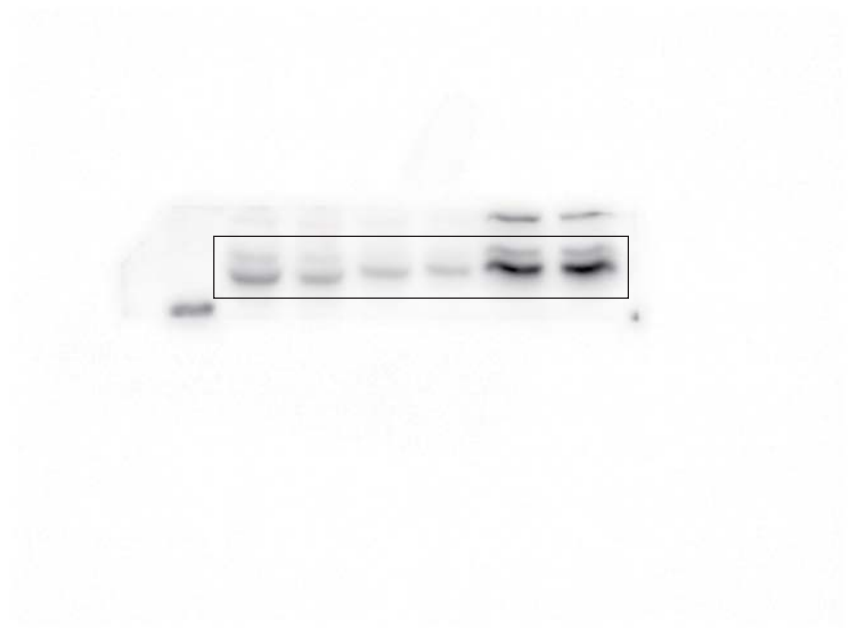

SMARCB1

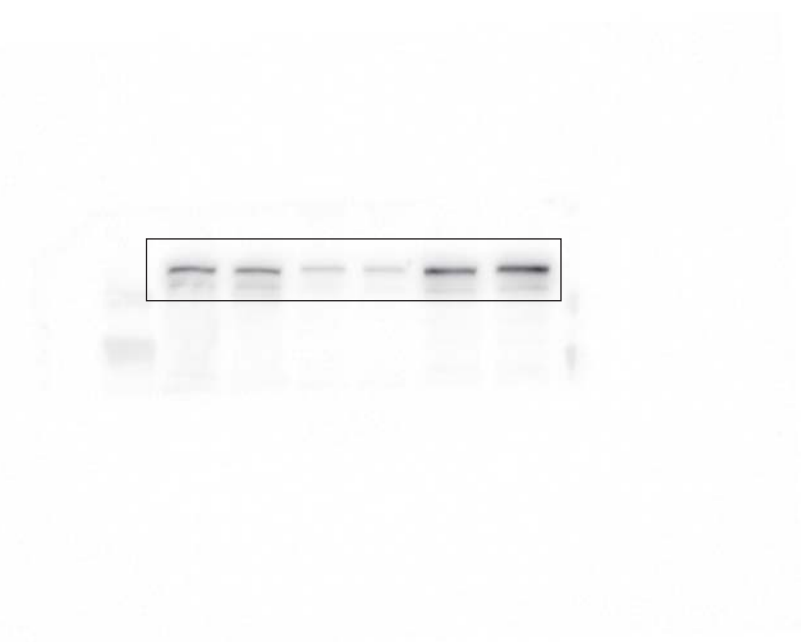

BRG1

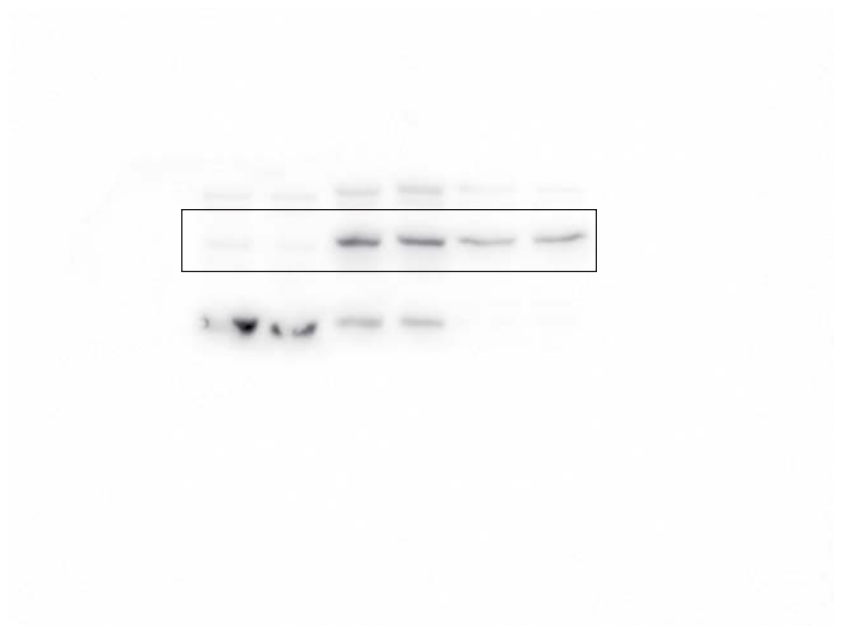

LaminB

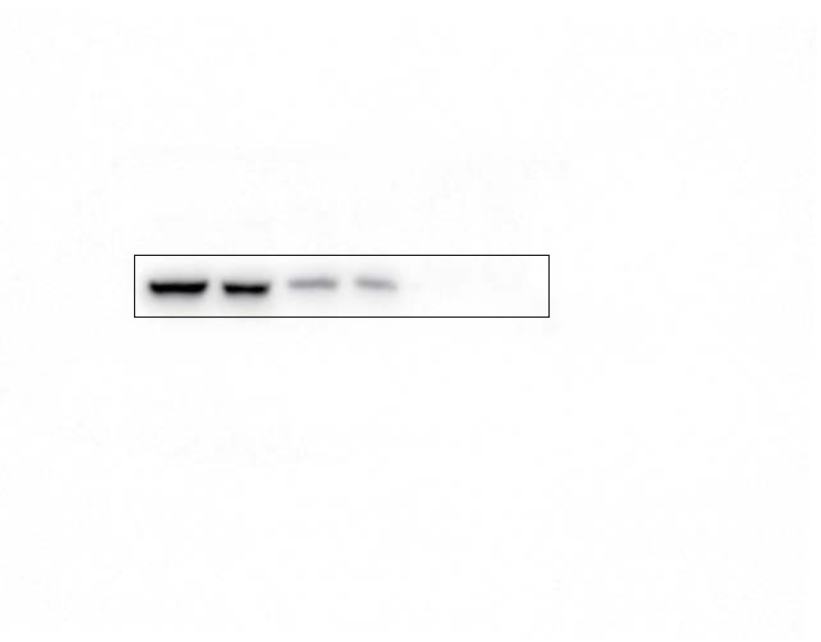

$\alpha$ -TUBULIN

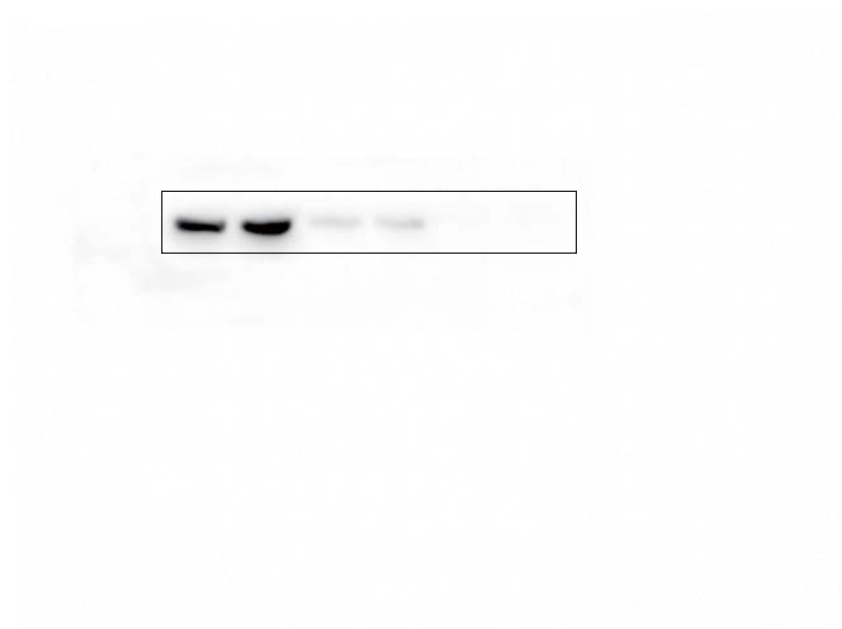

GAPDH

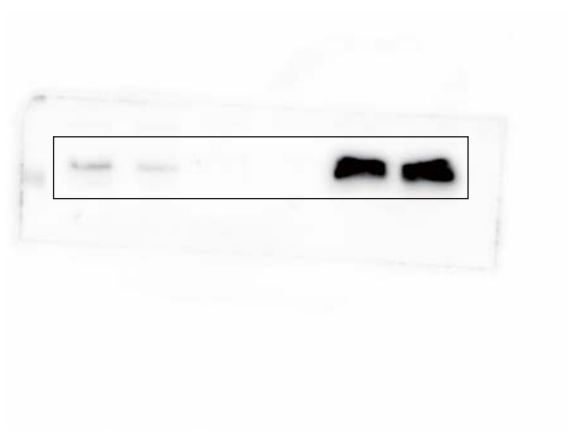

Histone H3
