# Supplementary material for: Inositol polyphosphate multikinase physically binds to the SWI/SNF complex and modulates BRG1 occupancy in mouse embryonic stem cells
Source: eLife journal article supplement (doi:10.7554/elife.73523), 2022-04-27

**B**

Mouse embryonic fibroblasts  
NIH3T3

Cytoplasm  
Nucleoplasm  
Chromatin

IPMK

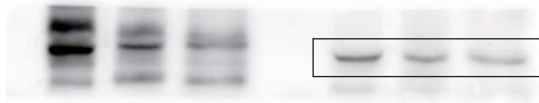

SMARCB1

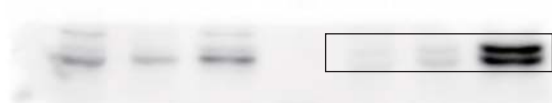

LaminB1

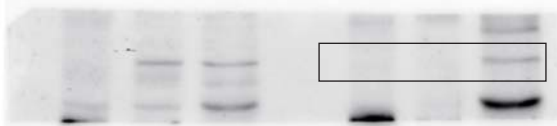

$\alpha$ -TUBULIN

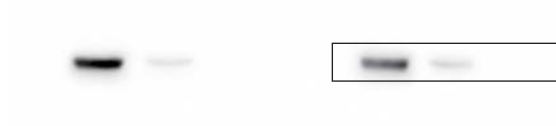

Histone H3

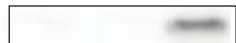

Supplement: fig4-figsupp1-data3 [file elife-73523-fig4-figsupp1-data3-v1.zip]
