# Supplementary material for: Inositol polyphosphate multikinase physically binds to the SWI/SNF complex and modulates BRG1 occupancy in mouse embryonic stem cells
Source: eLife. 2022 May 12;11:e73523. doi: 10.7554/eLife.73523 (PMC9098221; doi:10.7554/eLife.73523)
Supplement: Figure 1—source data 2. [file elife-73523-fig1-data2.xlsx]

## Sheet: Sheet1
							normalized value						average		log2(fold)	P-value
Proteins	C1	C2	C3	I1	I2	I3	ctrl1	ctrl2	ctrl3	Ipmk1	Ipmk2	Ipmk3	ctrl	Ipmk
ARID1A	309310	657550	402130	1995400	1308500	2293000	0.132172	0.310209	0.258971	2.7889	1.69975	8.4992	0.233784	4.32928	4.21088	0.12413
SMARCA4	895210	707790	1687400	2602200	1101700	1354800	0.382536	0.33391	1.08668	3.637	1.43111	5.02168	0.601043	3.36327	2.48432	0.0617642
SMARCB1	518640	312310	660960	1038600	490890	418450	0.221622	0.147337	0.425657	1.45161	0.637669	1.55102	0.264872	1.21343	2.19573	0.0344812
SMARCC1	1	1	1	1	291740	1	4.27314e-07	4.71765e-07	6.43998e-07	1.39766e-06	0.378972	3.70659e-06	5.14359e-07	0.126326	17.9059	0.373894
SMARCC2	593110	922980	644410	1101600	624700	956600	0.253444	0.43543	0.414999	1.53967	0.811488	3.54572	0.367957	1.96562	2.41738	0.123038
PRBM1	1	337490	417740	1347500	880700	1	4.27314e-07	0.159216	0.269024	1.88335	1.14403	3.70659e-06	0.142747	1.00913	2.82158	0.192496
HSP90α	35499000	46791000	41963000	10709000	8351700	10022000	15.1692	22.0744	27.0241	14.9676	10.8489	37.1474	21.4226	20.988	-0.0295682	0.963234
HSP90β	37634000	49032000	43812000	11168000	8770400	9658600	16.0815	23.1316	28.2148	15.6091	11.3928	35.8004	22.476	20.9341	-0.102528	0.861883
							* Error bar was automatically calculated by Prism program (SEM)
