# Supplementary material for: Inositol polyphosphate multikinase physically binds to the SWI/SNF complex and modulates BRG1 occupancy in mouse embryonic stem cells
Source: eLife. 2022 May 12;11:e73523. doi: 10.7554/eLife.73523 (PMC9098221; doi:10.7554/eLife.73523)
Supplement: Figure 4—source data 1. [file elife-73523-fig4-data1.xlsx]

## Sheet: 시트1
	Ipmk Ct	Bactin Ct	2^-ddCt		Ipmk knockdown
EgfpKD 1	28.9362	26.1783	1.25364			average	error bar	ttest
EgfpKD 2	29.3487	26.4379	1.12754		EgfpKD	1.01689	0.10634
EgfpKD 3	29.4571	26.2253	0.902659		IpmkKD	0.215362	0.0448595	0.000442053
EgfpKD 4	29.3426	25.907	0.783744
IpmkKD 1	32.2233	26.1103	0.122511
IpmkKD 2	31.5216	25.9422	0.177349
IpmkKD 3	30.7298	26.0607	0.333327
IpmkKD 4	31.4809	26.2656	0.228261
