# Supplementary material for: Inositol polyphosphate multikinase physically binds to the SWI/SNF complex and modulates BRG1 occupancy in mouse embryonic stem cells
Source: eLife. 2022 May 12;11:e73523. doi: 10.7554/eLife.73523 (PMC9098221; doi:10.7554/eLife.73523)
Supplement: Figure 4—source data 2. [file elife-73523-fig4-data2.xlsx]

## Sheet: 시트1
	Ipmk Ct	Bactin Ct	2^-ddCt		Ipmk knockdown
WT 1	23.5123	19.6149	1.05752			average	error bar	ttest
WT 2	23.4785	19.6378	1.09987		WT	1.05315	0.0283179
WT 3	23.3401	19.3651	1.00207		shNT	1.00425	0.0638746	0.522594
shNT 1	23.3328	19.4491	1.06763		shIpmk1	0.0532332	0.000984564	0.000118566
shNT 2	24.0935	19.9253	0.876505		shIpmk2	0.124233	0.00881398	0.000166914
shNT 3	23.3899	19.5076	1.06862
shIpmk1 1	27.6129	19.352	0.0513695
shIpmk1 2	27.6465	19.4766	0.0547156
shIpmk1 3	27.6859	19.4867	0.0536145
shIpmk2 1	26.4297	19.6031	0.138832
shIpmk2 2	26.5456	19.3617	0.108377
shIpmk2 3	26.5097	19.5373	0.12549
