# Supplementary material for: Inositol polyphosphate multikinase physically binds to the SWI/SNF complex and modulates BRG1 occupancy in mouse embryonic stem cells
Source: eLife. 2022 May 12;11:e73523. doi: 10.7554/eLife.73523 (PMC9098221; doi:10.7554/eLife.73523)
Supplement: Figure 6—figure supplement 1—source data 1. [file elife-73523-fig6-figsupp1-data1.xlsx]

## Sheet: 시트1
	Me2 Ct	Bactin Ct	2^-ddCt			Me2
EgfpKD 1	24.7948	22.9463	1.00606			average	error bar	ttest
EgfpKD 2	24.6182	22.8654	1.075		EgfpKD	1.00136	0.030115
EgfpKD 3	24.9039	22.9385	0.927766		IpmkKD	0.621198	0.0248674	6.75303e-05
EgfpKD 4	24.9208	23.0587	0.996626
IpmkKD 1	25.5125	22.9529	0.614552
IpmkKD 2	25.2001	22.5316	0.569835
IpmkKD 3	25.3904	22.8227	0.611114
IpmkKD 4	25.3398	22.9458	0.689291
	Sfrp2 Ct	Bactin Ct	2^-ddCt			Sfrp2
EgfpKD 1	27.4095	22.7995	1.00606			average	error bar	ttest
EgfpKD 2	27.281	22.9356	1.075		EgfpKD	1.00481	0.0579712
EgfpKD 3	27.2663	22.6728	0.927766		IpmkKD	0.45451	0.0446185	0.000285828
EgfpKD 4	27.4373	22.707	0.996626
IpmkKD 1	28.9189	22.9087	0.614552
IpmkKD 2	28.6981	22.8162	0.569835
IpmkKD 3	28.3505	22.9694	0.611114
IpmkKD 4	28.4414	22.8037	0.689291
