# Supplementary material for: Inositol polyphosphate multikinase physically binds to the SWI/SNF complex and modulates BRG1 occupancy in mouse embryonic stem cells
Source: eLife. 2022 May 12;11:e73523. doi: 10.7554/eLife.73523 (PMC9098221; doi:10.7554/eLife.73523)
Supplement: Figure 6—source data 1. [file elife-73523-fig6-data1.xlsx]

## Sheet: 시트1
	Rasl12 Ct	Bactin Ct	2^-ddCt			Rasl12
EgfpKD 1	33.1243	22.896	1.28078			average	error bar	ttest
EgfpKD 2	33.8594	22.8309	0.735498		EgfpKD	1.01923	0.111492
EgfpKD 3	33.5249	22.9853	1.03218		IpmkKD	0.526883	0.0728217	0.0101217
EgfpKD 4	33.4348	22.8901	1.02847
IpmkKD 1	33.8985	22.7769	0.689506
IpmkKD 2	34.7323	22.9324	0.430877
IpmkKD 3	34.9369	22.9561	0.380098
IpmkKD 4	34.1755	22.8702	0.607052
