# Supplementary material for: Inositol polyphosphate multikinase physically binds to the SWI/SNF complex and modulates BRG1 occupancy in mouse embryonic stem cells
Source: eLife. 2022 May 12;11:e73523. doi: 10.7554/eLife.73523 (PMC9098221; doi:10.7554/eLife.73523)
Supplement: Figure 6—source data 2. [file elife-73523-fig6-data2.xlsx]

## Sheet: 시트1
	Phactr3 Ct	Bactin Ct	2^-ddCt			Phactr3
EgfpKD 1	34.4621	26.1783	0.814928			average	error bar	ttest
EgfpKD 2	33.9234	26.4379	1.41711		EgfpKD	1.04236	0.170278
EgfpKD 3	33.9059	26.2253	1.23788		IpmkKD	0.348874	0.0468115	0.00773966
EgfpKD 4	34.4111	25.907	0.699515
IpmkKD 1	35.9429	26.1103	0.278527
IpmkKD 2	35.4905	25.9422	0.339219
IpmkKD 3	35.816	26.0607	0.293866
IpmkKD 4	35.3014	26.2656	0.483885
