# Supplementary material for: Inositol polyphosphate multikinase physically binds to the SWI/SNF complex and modulates BRG1 occupancy in mouse embryonic stem cells
Source: eLife. 2022 May 12;11:e73523. doi: 10.7554/eLife.73523 (PMC9098221; doi:10.7554/eLife.73523)
Supplement: Figure 6—source data 3. [file elife-73523-fig6-data3.xlsx]

## Sheet: Sheet1
		Actual Value	Relative Value	P-val
Phactr3	EgfpKD	1.11712	1
Phactr3	IpmkKD	0.304389	0.272477	0.00145
Lrrc61	EgfpKD	2.65416	1
Lrrc61	IpmkKD	1.30293	0.490901	0.00215
