# Supplementary material for: Inositol polyphosphate multikinase physically binds to the SWI/SNF complex and modulates BRG1 occupancy in mouse embryonic stem cells
Source: eLife. 2022 May 12;11:e73523. doi: 10.7554/eLife.73523 (PMC9098221; doi:10.7554/eLife.73523)
Supplement: Figure 6—source data 4. [file elife-73523-fig6-data4.xlsx]

## Sheet: Sheet1
		Actual Value	Relative Value	P-val
Arhgap44	EgfpKD	10.3095	1
Arhgap44	IpmkKD	6.20906	0.602266	0.03035
