# Supplementary material for: Inositol polyphosphate multikinase physically binds to the SWI/SNF complex and modulates BRG1 occupancy in mouse embryonic stem cells
Source: eLife. 2022 May 12;11:e73523. doi: 10.7554/eLife.73523 (PMC9098221; doi:10.7554/eLife.73523)
Supplement: Figure 7—figure supplement 1—source data 1. [file elife-73523-fig7-figsupp1-data1.xlsx]

## Sheet: Fgf5
	Fgf5 Ct	Arbp Ct	2^-ddCt		Fgf5
shNT Day 0 1	34.6488	22.6767	0.583282			average	error bar	ttest
shNT Day 0 2	33.0444	22.6277	1.71444		shNT Day 0	1.14886	0.565577
shNT Day 2 1	24.7504	22.2335	409.445		shNT Day 2	453.647	22.8975
shNT Day 2 2	24.8213	22.552	486.117		shNT Day 4	1731.02	20.9922
shNT Day 2 3	25.0558	22.7237	465.379		shNT Day 6	410.691	10.1969
shNT Day 4 1	22.8643	22.3761	1670.61		shNT Day 8	103.053	2.92923
shNT Day 4 2	23.0858	22.6532	1736.35		shIpmk Day 0	0.750576	0.0549334	0.420219
shNT Day 4 3	22.9534	22.5336	1751.71		shIpmk Day 2	479.862	58.2874	0.697
shNT Day 4 4	22.7672	22.3585	1765.4		shIpmk Day 4	734.477	269.349	0.00705145
shNT Day 6 1	24.1859	21.6371	400.494		shIpmk Day 6	138.694	29.4144	0.00364546
shNT Day 6 2	25.1099	22.6328	420.888		shIpmk Day 8	28.3273	7.76151	0.000841083
shNT Day 8 1	27.0645	22.5374	101.638
shNT Day 8 2	26.9925	22.4251	98.8378
shNT Day 8 3	26.5863	22.1559	108.684
shIpmk Day 0 1	34.533	22.8515	0.713451
shIpmk Day 0 2	34.4363	22.6846	0.679587
shIpmk Day 0 3	34.1297	22.7155	0.858689
shIpmk Day 2 1	24.8807	22.4013	420.237
shIpmk Day 2 2	24.931	22.4608	422.923
shIpmk Day 2 3	24.532	22.5578	596.426
shIpmk Day 4 1	23.8521	22.5515	951.322
shIpmk Day 4 2	25.9437	22.3859	198.995
shIpmk Day 4 3	23.5744	22.4205	1053.11
shIpmk Day 6 1	26.327	22.0311	119.304
shIpmk Day 6 2	27.3762	22.526	81.2408
shIpmk Day 6 3	26.9337	22.8032	133.796
shIpmk Day 6 4	25.6299	22.2198	220.436
shIpmk Day 8 1	29.0382	23.1241	38.863
shIpmk Day 8 2	29.2675	23.1145	32.9322
shIpmk Day 8 3	30.4201	22.9467	13.1866

## Sheet: Otx2
	Otx2 Ct	Arbp Ct	2^-ddCt		Otx2
shNT Day 0 1	26.9179	22.6767	1.02145			average	error bar	ttest
shNT Day 0 2	26.9302	22.6277	0.979002		shNT Day 0	1.00023	0.0212235
shNT Day 2 1	22.6072	22.2335	14.9098		shNT Day 2	17.1949	1.5022
shNT Day 2 2	22.5	22.552	20.0267		shNT Day 4	23.4073	1.65229
shNT Day 2 3	22.9382	22.7237	16.6483		shNT Day 6	6.8149	0.627064
shNT Day 4 1	22.0897	22.3761	23.56		shNT Day 8	3.39208	0.169863
shNT Day 4 2	22.3244	22.6532	24.2626		shIpmk Day 0	0.606531	0.139693	0.117936
shNT Day 4 3	22.0574	22.5336	26.8718		shIpmk Day 2	20.0779	2.40075	0.366242
shNT Day 4 4	22.3874	22.3585	18.9348		shIpmk Day 4	14.4554	4.8292	0.102672
shNT Day 6 1	23.2796	21.6371	6.18783		shIpmk Day 6	6.4	1.14077	0.824603
shNT Day 6 2	24.009	22.6328	7.44196		shIpmk Day 8	2.86666	0.547557	0.411275
shNT Day 8 1	25.1993	22.5374	3.0524
shNT Day 8 2	24.8622	22.4251	3.56712
shNT Day 8 3	24.5972	22.1559	3.55671
shIpmk Day 0 1	28.5932	22.8515	0.360995
shIpmk Day 0 2	27.6605	22.6846	0.613861
shIpmk Day 0 3	27.2308	22.7155	0.844738
shIpmk Day 2 1	22.6237	22.4013	16.5583
shIpmk Day 2 2	22.484	22.4608	19.0092
shIpmk Day 2 3	22.2052	22.5578	24.6661
shIpmk Day 4 1	22.5147	22.5515	19.8164
shIpmk Day 4 2	24.3895	22.3859	4.81731
shIpmk Day 4 3	22.4648	22.4205	18.7326
shIpmk Day 6 1	23.5242	22.0311	6.86271
shIpmk Day 6 2	24.9973	22.526	3.48338
shIpmk Day 6 3	24.4351	22.8032	6.23327
shIpmk Day 6 4	23.3184	22.2198	9.02065
shIpmk Day 8 1	25.4176	23.1241	3.94047
shIpmk Day 8 2	26.0552	23.1145	2.51595
shIpmk Day 8 3	26.1185	22.9467	2.14358

## Sheet: Zic1
	Zic1 Ct	Arbp Ct	2^-ddCt		Zic1
shNT Day 0 1	35.3291	22.6767	0.427422			average	error bar	ttest
shNT Day 0 2	32.8277	22.6277	2.33961		shNT Day 0	1.38351	0.956092
shNT Day 2 1	31.7146	22.2335	3.8508		shNT Day 2	2.51706	1.18218
shNT Day 2 2	36.6268	22.552	0.159479		shNT Day 4	53.6272	15.2607
shNT Day 2 3	32.3257	22.7237	3.54091		shNT Day 6	516.995	135.912
shNT Day 4 1	28.6172	22.3761	36.3803		shNT Day 8	360.858	37.5202
shNT Day 4 2	29.1965	22.6532	29.5066		shIpmk Day 0	0.768239	Undetermined	Undetermined
shNT Day 4 3	28.2792	22.5336	51.2914		shIpmk Day 2	1.92783	1.49426	0.772569
shNT Day 4 4	27.1799	22.3585	97.3303		shIpmk Day 4	108.688	11.2216	0.0425046
shNT Day 6 1	24.4894	21.6371	381.084		shIpmk Day 6	501.591	70.6247	0.914476
shNT Day 6 2	24.7083	22.6328	652.907		shIpmk Day 8	334.986	65.6035	0.749332
shNT Day 8 1	25.7988	22.5374	286.982
shNT Day 8 2	25.2574	22.4251	386.393
shNT Day 8 3	24.9054	22.1559	409.199
shIpmk Day 0 1	Undetermined	22.8515	Undetermined
shIpmk Day 0 2	Undetermined	22.6846	Undetermined
shIpmk Day 0 3	34.5221	22.7155	0.768239
shIpmk Day 2 1	37.1253	22.4013	0.101692
shIpmk Day 2 2	34.2232	22.4608	0.792157
shIpmk Day 2 3	31.6943	22.5578	4.88964
shIpmk Day 4 1	26.9448	22.5515	130.954
shIpmk Day 4 2	27.2404	22.3859	95.1188
shIpmk Day 4 3	27.2029	22.4205	99.992
shIpmk Day 6 1	24.2165	22.0311	605.009
shIpmk Day 6 2	25.6241	22.526	321.362
shIpmk Day 6 3	24.9467	22.8032	622.841
shIpmk Day 6 4	24.8094	22.2198	457.153
shIpmk Day 8 1	25.6869	23.1241	465.768
shIpmk Day 8 2	26.5158	23.1145	260.458
shIpmk Day 8 3	26.2501	22.9467	278.733
