# Supplementary material for: Inositol polyphosphate multikinase physically binds to the SWI/SNF complex and modulates BRG1 occupancy in mouse embryonic stem cells
Source: eLife. 2022 May 12;11:e73523. doi: 10.7554/eLife.73523 (PMC9098221; doi:10.7554/eLife.73523)
Supplement: Figure 7—figure supplement 1—source data 2. [file elife-73523-fig7-figsupp1-data2.xlsx]

## Sheet: Brachyury
	Brachyury Ct	Arbp Ct	2^-ddCt		Brachyury
shNT Day 0 1	27.5958	22.6767	1.05912			average	error bar	ttest
shNT Day 0 2	27.7126	22.6277	0.944182		shNT Day 0	1.04622	0.307531
shNT Day 2 1	29.9851	22.2335	0.14869		shNT Day 2	0.48121	0.0477605
shNT Day 2 2	29.1835	22.552	0.323198		shNT Day 4	0.377002	0.0297705
shNT Day 2 3	30.3273	22.7237	0.16475		shNT Day 6	0.294766	0.0153659
shNT Day 4 1	27.4066	22.3761	0.98046		shNT Day 8	0.657522	0.0530448
shNT Day 4 2	27.5115	22.6532	1.10474		shIpmk Day 0	0.331354	0.0382575	0.0519348
shNT Day 4 3	26.8626	22.5336	1.59434		shIpmk Day 2	0.27486	0.0205585	0.11432
shNT Day 4 4	27.2073	22.3585	1.1121		shIpmk Day 4	0.16769	0.0283087	0.377673
shNT Day 6 1	23.8725	21.6371	6.80529		shIpmk Day 6	0.15567	0.0120012	0.0840196
shNT Day 6 2	23.1485	22.6328	22.4136		shIpmk Day 8	0.559713	0.0803403	0.0171097
shNT Day 8 1	22.8918	22.5374	25.0644
shNT Day 8 2	22.7883	22.4251	24.9124
shNT Day 8 3	21.5261	22.1559	49.5823
shIpmk Day 0 1	29.217	22.8515	0.388632
shIpmk Day 0 2	28.555	22.6846	0.547764
shIpmk Day 0 3	28.138	22.7155	0.747154
shIpmk Day 2 1	30.9564	22.4013	0.0851937
shIpmk Day 2 2	31.5445	22.4608	0.0590598
shIpmk Day 2 3	30.4803	22.5578	0.132083
shIpmk Day 4 1	26.1418	22.5515	2.66046
shIpmk Day 4 2	28.2868	22.3859	0.536291
shIpmk Day 4 3	26.4304	22.4205	1.98907
shIpmk Day 6 1	24.9351	22.0311	4.28114
shIpmk Day 6 2	26.3007	22.526	2.34119
shIpmk Day 6 3	26.3855	22.8032	2.67529
shIpmk Day 6 4	24.9951	22.2198	4.68054
shIpmk Day 8 1	27.5452	23.1241	1.49578
shIpmk Day 8 2	28.2151	23.1145	0.933916
shIpmk Day 8 3	29.215	22.9467	0.415728

## Sheet: Cd34
	Cd34 Ct	Arbp Ct	2^-ddCt		Cd34
shNT Day 0 1	29.4726	22.6767	0.929299			average	error bar	ttest
shNT Day 0 2	29.2121	22.6277	1.07608		shNT Day 0	1.00269	0.0733906
shNT Day 2 1	28.5678	22.2335	1.27978		shNT Day 2	1.35332	0.0383026
shNT Day 2 2	28.7864	22.552	1.37152		shNT Day 4	1.02299	0.0755033
shNT Day 2 3	28.9195	22.7237	1.40867		shNT Day 6	0.200847	0.00882626
shNT Day 4 1	29.0413	22.3761	1.01748		shNT Day 8	0.101761	0.0134514
shNT Day 4 2	29.0751	22.6532	1.20442		shIpmk Day 0	0.468647	0.0890617	0.0247217
shNT Day 4 3	29.1741	22.5336	1.03502		shIpmk Day 2	1.20469	0.0906633	0.205521
shNT Day 4 4	29.3088	22.3585	0.835059		shIpmk Day 4	0.680425	0.297519	0.25179
shNT Day 6 1	30.708	21.6371	0.192021		shIpmk Day 6	0.152689	0.0264367	0.295208
shNT Day 6 2	31.5768	22.6328	0.209673		shIpmk Day 8	0.0815271	0.0476821	0.703888
shNT Day 8 1	32.9394	22.5374	0.076317
shNT Day 8 2	32.1497	22.4251	0.122051
shNT Day 8 3	32.0715	22.1559	0.106916
shIpmk Day 0 1	31.3202	22.8515	0.291475
shIpmk Day 0 2	30.1778	22.6846	0.573156
shIpmk Day 0 3	30.2912	22.7155	0.541309
shIpmk Day 2 1	28.9451	22.4013	1.10684
shIpmk Day 2 2	28.9857	22.4608	1.12141
shIpmk Day 2 3	28.7772	22.5578	1.38582
shIpmk Day 4 1	29.1236	22.5515	1.08533
shIpmk Day 4 2	32.3928	22.3859	0.10036
shIpmk Day 4 3	29.3357	22.4205	0.855581
shIpmk Day 6 1	31.1111	22.0311	0.19081
shIpmk Day 6 2	32.9601	22.526	0.0746359
shIpmk Day 6 3	31.9888	22.8032	0.177344
shIpmk Day 6 4	31.4837	22.2198	0.167967
shIpmk Day 8 1	32.3459	23.1241	0.17295
shIpmk Day 8 2	33.8802	23.1145	0.059312
shIpmk Day 8 3	35.9798	22.9467	0.012319

## Sheet: Gata2
	Gata2 Ct	Arbp Ct	2^-ddCt		Gata2
shNT Day 0 1	31.4962	22.6767	1.62512			average	error bar	ttest
shNT Day 0 2	32.8483	22.6277	0.615339		shNT Day 0	1.12023	0.504891
shNT Day 2 1	32.8511	22.2335	0.467309		shNT Day 2	0.207661	0.130093
shNT Day 2 2	36.0525	22.552	0.0633523		shNT Day 4	1.51108	0.270097
shNT Day 2 3	35.6809	22.7237	0.0923213		shNT Day 6	2.81195	0.817291
shNT Day 4 1	31.7699	22.3761	1.09143		shNT Day 8	25.9131	5.19723
shNT Day 4 2	31.5793	22.6532	1.50944		shIpmk Day 0	1.04802	0.7217	0.947233
shNT Day 4 3	31.8281	22.5336	1.1692		shIpmk Day 2	0.221784	0.142574	0.945181
shNT Day 4 4	30.6932	22.3585	2.27426		shIpmk Day 4	1.85472	0.576855	0.578576
shNT Day 6 1	30.161	21.6371	1.99465		shIpmk Day 6	3.0941	0.426194	0.745716
shNT Day 6 2	30.2932	22.6328	3.62924		shIpmk Day 8	47.9081	5.08591	0.0389816
shNT Day 8 1	26.8763	22.5374	36.2806
shNT Day 8 2	27.5271	22.4251	21.3778
shNT Day 8 3	27.3482	22.1559	20.0809
shIpmk Day 0 1	35.3945	22.8515	0.123025
shIpmk Day 0 2	33.0648	22.6846	0.550907
shIpmk Day 0 3	30.931	22.7155	2.47012
shIpmk Day 2 1	36.9761	22.4013	0.030086
shIpmk Day 2 2	34.8718	22.4608	0.134819
shIpmk Day 2 3	33.0766	22.5578	0.500446
shIpmk Day 4 1	30.6661	22.5515	2.64899
shIpmk Day 4 2	32.3542	22.3859	0.732926
shIpmk Day 4 3	30.8147	22.4205	2.18225
shIpmk Day 6 1	29.8834	22.0311	3.1773
shIpmk Day 6 2	30.5553	22.526	2.81031
shIpmk Day 6 3	31.2013	22.8032	2.17652
shIpmk Day 6 4	29.6652	22.2198	4.21226
shIpmk Day 8 1	27.2757	23.1241	41.3112
shIpmk Day 8 2	26.7788	23.1145	57.9118
shIpmk Day 8 3	26.9909	22.9467	44.5012

## Sheet: Runx1
	Runx1 Ct	Arbp Ct	2^-ddCt		Runx1
shNT Day 0 1	29.1903	22.6767	1.0987			average	error bar	ttest
shNT Day 0 2	29.4129	22.6277	0.91017		shNT Day 0	1.00443	0.0942627
shNT Day 2 1	26.8941	22.2335	3.96913		shNT Day 2	4.25657	0.264781
shNT Day 2 2	27.196	22.552	4.01512		shNT Day 4	2.46182	0.12122
shNT Day 2 3	27.1144	22.7237	4.78547		shNT Day 6	1.92748	0.113402
shNT Day 4 1	27.9133	22.3761	2.16174		shNT Day 8	2.83763	0.239491
shNT Day 4 2	27.856	22.6532	2.72572		shIpmk Day 0	0.295534	0.0362503	0.00354238
shNT Day 4 3	27.8216	22.5336	2.56931		shIpmk Day 2	0.53244	0.163186	0.00027882
shNT Day 4 4	27.7506	22.3585	2.39049		shIpmk Day 4	0.739822	0.20713	0.000605759
shNT Day 6 1	27.2574	21.6371	2.04088		shIpmk Day 6	1.07112	0.10477	0.00757477
shNT Day 6 2	28.423	22.6328	1.81407		shIpmk Day 8	1.49085	0.0869462	0.00614525
shNT Day 8 1	27.6453	22.5374	2.91099
shNT Day 8 2	27.3915	22.4251	3.21087
shNT Day 8 3	27.5476	22.1559	2.39103
shIpmk Day 0 1	31.663	22.8515	0.223423
shIpmk Day 0 2	30.9551	22.6846	0.325097
shIpmk Day 0 3	30.9295	22.7155	0.338084
shIpmk Day 2 1	31.246	22.4013	0.218359
shIpmk Day 2 2	29.8171	22.4608	0.612648
shIpmk Day 2 3	29.5912	22.5578	0.766314
shIpmk Day 4 1	29.0934	22.5515	1.07741
shIpmk Day 4 2	30.4969	22.3859	0.363102
shIpmk Day 4 3	29.4303	22.4205	0.778951
shIpmk Day 6 1	28.6536	22.0311	1.01882
shIpmk Day 6 2	29.2937	22.526	0.921221
shIpmk Day 6 3	28.9883	22.8032	1.37968
shIpmk Day 6 4	28.9209	22.2198	0.964781
shIpmk Day 8 1	29.234	23.1241	1.45354
shIpmk Day 8 2	29.0357	23.1145	1.65659
shIpmk Day 8 3	29.1499	22.9467	1.36241
