# Supplementary material for: Inositol polyphosphate multikinase physically binds to the SWI/SNF complex and modulates BRG1 occupancy in mouse embryonic stem cells
Source: eLife. 2022 May 12;11:e73523. doi: 10.7554/eLife.73523 (PMC9098221; doi:10.7554/eLife.73523)
Supplement: Figure 7—figure supplement 1—source data 3. [file elife-73523-fig7-figsupp1-data3.xlsx]

## Sheet: 시트1
Day 0	Raw Data				Normalize with "shNT"					Average
		shNT	shIpmk			shNT	shIpmk			shNT	shIpmk
	Endo_ Foxa1	1.04622	0.331354		Endo_ Foxa1	1	0.316715		Endoderm	1	0.171819
	Endo_ Foxa2	1.08574	0.0479283		Endo_ Foxa2	1	0.0441436		Mesoderm	1	0.564354
	Endo_ Gata6	1.01307	0.163816		Endo_ Gata6	1	0.161703		Ectoderm	1	0.605
	Endo_ Sox17	1.02718	0.169191		Endo_ Sox17	1	0.164714
	Meso_ Brachyury	1.00165	0.561183		Meso_ Brachyury	1	0.560259
	Meso_ Cd34	1.00269	0.468647		Meso_ Cd34	1	0.46739
	Maso_ Gata2	1.12023	1.04802		Maso_ Gata2	1	0.935538
	Meso_ Runx1	1.00443	0.295534		Meso_ Runx1	1	0.29423
	Ecto_ Fgf5	1.14886	0.750576		Ecto_ Fgf5	1	0.653323
	Ecto_ Otx2	1.00023	0.606531		Ecto_ Otx2	1	0.606395
	Ecto_ Zic1	1.38351	0.768239		Ecto_ Zic1	1	0.555281
Day 2	Raw Data				Normalize with "shNT"					Average
		shNT	shIpmk			shNT	shIpmk			shNT	shIpmk
	Endo_ Foxa1	0.48121	0.27486		Endo_ Foxa1	1	0.571185		Endoderm	1	0.222936
	Endo_ Foxa2	4.12407	0.404086		Endo_ Foxa2	1	0.0979822		Mesoderm	1	0.629331
	Endo_ Gata6	3.05187	0.326424		Endo_ Gata6	1	0.106959		Ectoderm	1	0.997119
	Endo_ Sox17	2.54038	0.293712		Endo_ Sox17	1	0.115617
	Meso_ Brachyury	0.212213	0.0921122		Meso_ Brachyury	1	0.434055
	Meso_ Cd34	1.35332	1.20469		Meso_ Cd34	1	0.890173
	Maso_ Gata2	0.207661	0.221784		Maso_ Gata2	1	1.06801
	Meso_ Runx1	4.25657	0.53244		Meso_ Runx1	1	0.125087
	Ecto_ Fgf5	453.647	479.862		Ecto_ Fgf5	1	1.05779
	Ecto_ Otx2	17.1949	20.0779		Ecto_ Otx2	1	1.16766
	Ecto_ Zic1	2.51706	1.92783		Ecto_ Zic1	1	0.765904
Day 4	Raw Data				Normalize with "shNT"					Average
		shNT	shIpmk			shNT	shIpmk			shNT	shIpmk
	Endo_ Foxa1	0.377002	0.16769		Endo_ Foxa1	1	0.444798		Endoderm	1	0.20843
	Endo_ Foxa2	8.98824	0.684027		Endo_ Foxa2	1	0.0761025		Mesoderm	1	0.90902
	Endo_ Gata6	2.0521	0.334278		Endo_ Gata6	1	0.162895		Ectoderm	1	1.02287
	Endo_ Sox17	2.69282	0.403714		Endo_ Sox17	1	0.149923
	Meso_ Brachyury	1.19791	1.7286		Meso_ Brachyury	1	1.44302
	Meso_ Cd34	1.02299	0.680425		Meso_ Cd34	1	0.665131
	Maso_ Gata2	1.51108	1.85472		Maso_ Gata2	1	1.22741
	Meso_ Runx1	2.46182	0.739822		Meso_ Runx1	1	0.300519
	Ecto_ Fgf5	1731.02	734.477		Ecto_ Fgf5	1	0.424304
	Ecto_ Otx2	23.4073	14.4554		Ecto_ Otx2	1	0.61756
	Ecto_ Zic1	53.6272	108.688		Ecto_ Zic1	1	2.02674
Day 6	Raw Data				Normalize with "shNT"					Average
		shNT	shIpmk			shNT	shIpmk			shNT	shIpmk
	Endo_ Foxa1	0.294766	0.15567		Endo_ Foxa1	1	0.528113		Endoderm	1	0.309854
	Endo_ Foxa2	11.5988	3.89745		Endo_ Foxa2	1	0.336022		Mesoderm	1	0.663869
	Endo_ Gata6	1.96831	0.407666		Endo_ Gata6	1	0.207115		Ectoderm	1	0.749011
	Endo_ Sox17	6.93507	1.16625		Endo_ Sox17	1	0.168167
	Meso_ Brachyury	14.6094	3.49454		Meso_ Brachyury	1	0.239198
	Meso_ Cd34	0.200847	0.152689		Meso_ Cd34	1	0.760226
	Maso_ Gata2	2.81195	3.0941		Maso_ Gata2	1	1.10034
	Meso_ Runx1	1.92748	1.07112		Meso_ Runx1	1	0.555713
	Ecto_ Fgf5	410.691	138.694		Ecto_ Fgf5	1	0.337709
	Ecto_ Otx2	6.8149	6.4		Ecto_ Otx2	1	0.939119
	Ecto_ Zic1	516.995	501.591		Ecto_ Zic1	1	0.970204
Day 8	Raw Data				Normalize with "shNT"					Average
		shNT	shIpmk			shNT	shIpmk			shNT	shIpmk
	Endo_ Foxa1	0.657522	0.559713		Endo_ Foxa1	1	0.851246		Endoderm	1	0.48641
	Endo_ Foxa2	25.8912	21.7471		Endo_ Foxa2	1	0.839942		Mesoderm	1	0.800981
	Endo_ Gata6	1.31201	0.195494		Endo_ Gata6	1	0.149003		Ectoderm	1	0.682763
	Endo_ Sox17	7.54131	0.795213		Endo_ Sox17	1	0.105448
	Meso_ Brachyury	33.1864	0.948473		Meso_ Brachyury	1	0.0285802
	Meso_ Cd34	0.101761	0.0815271		Meso_ Cd34	1	0.801161
	Maso_ Gata2	25.9131	47.9081		Maso_ Gata2	1	1.8488
	Meso_ Runx1	2.83763	1.49085		Meso_ Runx1	1	0.525384
	Ecto_ Fgf5	103.053	28.3273		Ecto_ Fgf5	1	0.274879
	Ecto_ Otx2	3.39208	2.86666		Ecto_ Otx2	1	0.845106
	Ecto_ Zic1	360.858	334.986		Ecto_ Zic1	1	0.928305
