# Supplementary material for: Inositol polyphosphate multikinase physically binds to the SWI/SNF complex and modulates BRG1 occupancy in mouse embryonic stem cells
Source: eLife. 2022 May 12;11:e73523. doi: 10.7554/eLife.73523 (PMC9098221; doi:10.7554/eLife.73523)
Supplement: Figure 7—source data 1. [file elife-73523-fig7-data1.xlsx]

## Sheet: Esrrb
	Esrrb Ct	Arbp Ct	2^-ddCt		Esrrb
shNT Day 0 1	22.9802	22.718	0.936166			average	error bar	ttest
shNT Day 0 2	22.9282	22.7054	0.962054		shNT Day 0	1.00285	0.0542535
shNT Day 0 3	22.6844	22.6683	1.11032		shNT Day 2	0.486662	0.0279904
shNT Day 2 1	23.6612	22.5754	0.528919		shNT Day 4	0.0650594	0.00435892
shNT Day 2 2	23.742	22.5673	0.497334		shNT Day 6	0.0515317	0.0029491
shNT Day 2 3	23.985	22.6129	0.433735		shNT Day 8	0.0217211	0.0100059
shNT Day 4 1	26.2181	22.2736	0.0729206		shIpmk Day 0	1.49245	0.378636	0.269734
shNT Day 4 2	26.3536	22.2297	0.0643925		shIpmk Day 2	0.457366	0.0105934	0.383053
shNT Day 4 3	26.5286	22.2504	0.057865		shIpmk Day 4	0.136979	0.00788048	0.00133275
shNT Day 6 1	26.7929	22.449	0.0552912		shIpmk Day 6	0.221183	0.0239725	0.00216419
shNT Day 6 2	26.8794	22.4904	0.0535878		shIpmk Day 8	0.107825	0.0178504	0.0136115
shNT Day 6 3	27.2269	22.6087	0.0457161
shNT Day 8 1	32.5639	23.3551	0.00189733
shNT Day 8 2	27.8255	22.7803	0.0340029
shNT Day 8 3	28.0944	22.8326	0.0292632
shIpmk Day 0 1	22.2615	23.2457	2.22098
shIpmk Day 0 2	22.7885	23.0079	1.30717
shIpmk Day 0 3	22.9198	22.6776	0.949217
shIpmk Day 2 1	24.1534	22.8347	0.450108
shIpmk Day 2 2	24.1638	22.9325	0.478233
shIpmk Day 2 3	24.0108	22.6717	0.443757
shIpmk Day 4 1	25.2722	22.138	0.127871
shIpmk Day 4 2	25.6088	22.5028	0.130393
shIpmk Day 4 3	25.5864	22.7079	0.152672
shIpmk Day 6 1	25.2835	23.0825	0.244186
shIpmk Day 6 2	25.1066	22.9169	0.246113
shIpmk Day 6 3	25.3964	22.7003	0.173251
shIpmk Day 8 1	25.9562	22.9085	0.13578
shIpmk Day 8 2	26.8615	22.9502	0.0746174
shIpmk Day 8 3	26.3928	23.0812	0.113077

## Sheet: Nanog
	Nanog Ct	Arbp Ct	2^-ddCt		Nanog
shNT Day 0 1	19.1726	22.718	1.09887			average	error bar	ttest
shNT Day 0 2	19.301	22.7054	0.996481		shNT Day 0	1.00286	0.0536813
shNT Day 0 3	19.3898	22.6683	0.913241		shNT Day 2	0.185259	0.0039503
shNT Day 2 1	21.6273	22.5754	0.181575		shNT Day 4	0.124083	0.0010888
shNT Day 2 2	21.53	22.5673	0.193153		shNT Day 6	0.0927173	0.0082042
shNT Day 2 3	21.669	22.6129	0.181048		shNT Day 8	0.0279864	0.0125644
shNT Day 4 1	21.8969	22.2736	0.122193		shIpmk Day 0	1.04249	0.208559	0.862976
shNT Day 4 2	21.8308	22.2297	0.12409		shIpmk Day 2	0.268473	0.0253032	0.031396
shNT Day 4 3	21.8299	22.2504	0.125965		shIpmk Day 4	0.213285	0.0176765	0.00729837
shNT Day 6 1	22.6041	22.449	0.0845253		shIpmk Day 6	0.178214	0.0176455	0.0117498
shNT Day 6 2	22.6459	22.4904	0.0845009		shIpmk Day 8	0.100491	0.0150969	0.0209926
shNT Day 6 3	22.3952	22.6087	0.109126
shNT Day 8 1	27.9684	23.3551	0.00384527
shNT Day 8 2	23.8101	22.7803	0.046098
shNT Day 8 3	24.3008	22.8326	0.034016
shIpmk Day 0 1	19.2964	23.2457	1.45384
shIpmk Day 0 2	19.9626	23.0079	0.776975
shIpmk Day 0 3	19.4255	22.6776	0.89664
shIpmk Day 2 1	21.209	22.8347	0.290429
shIpmk Day 2 2	21.2747	22.9325	0.296981
shIpmk Day 2 3	21.4598	22.6717	0.218008
shIpmk Day 4 1	21.1453	22.138	0.187274
shIpmk Day 4 2	21.3757	22.5028	0.205556
shIpmk Day 4 3	21.3157	22.7079	0.247025
shIpmk Day 6 1	22.4465	23.0825	0.146258
shIpmk Day 6 2	21.7787	22.9169	0.207162
shIpmk Day 6 3	21.7551	22.7003	0.181222
shIpmk Day 8 1	22.4911	22.9085	0.12569
shIpmk Day 8 2	23.3071	22.9502	0.0734867
shIpmk Day 8 3	22.961	23.0812	0.102294

## Sheet: Oct4
	Oct4 Ct	Arbp Ct	2^-ddCt		2022-10-04
shNT Day 0 1	20.2449	22.718	1.33108			average	error bar	ttest
shNT Day 0 2	20.7871	22.7054	0.9061		shNT Day 0	1.0221	0.156081
shNT Day 0 3	20.8782	22.6683	0.829123		shNT Day 2	0.836126	0.0340877
shNT Day 2 1	20.7462	22.5754	0.851833		shNT Day 4	0.689036	0.0432
shNT Day 2 2	20.6818	22.5673	0.885727		shNT Day 6	0.157237	0.0157687
shNT Day 2 3	20.9279	22.6129	0.77082		shNT Day 8	0.0360416	0.0170573
shNT Day 4 1	20.8306	22.2736	0.651792		shIpmk Day 0	1.1075	0.108689	0.676673
shNT Day 4 2	20.8127	22.2297	0.640143		shIpmk Day 2	1.03256	0.0245359	0.00946911
shNT Day 4 3	20.5573	22.2504	0.775174		shIpmk Day 4	0.545579	0.0521313	0.10147
shNT Day 6 1	23.0936	22.449	0.153355		shIpmk Day 6	0.211614	0.021751	0.112976
shNT Day 6 2	23.3505	22.4904	0.132073		shIpmk Day 8	0.081274	0.0143049	0.111977
shNT Day 6 3	22.9726	22.6087	0.186282
shNT Day 8 1	29.0725	23.3551	0.00455646
shNT Day 8 2	24.7047	22.7803	0.0631584
shNT Day 8 3	25.4012	22.8326	0.04041
shIpmk Day 0 1	20.8223	23.2457	1.28606
shIpmk Day 0 2	20.7768	23.0079	1.12559
shIpmk Day 0 3	20.7518	22.6776	0.910858
shIpmk Day 2 1	20.6693	22.8347	1.07545
shIpmk Day 2 2	20.8859	22.9325	0.990463
shIpmk Day 2 3	20.566	22.6717	1.03176
shIpmk Day 4 1	21.2515	22.138	0.443175
shIpmk Day 4 2	21.2286	22.5028	0.579803
shIpmk Day 4 3	21.3516	22.7079	0.613757
shIpmk Day 6 1	23.4367	23.0825	0.187544
shIpmk Day 6 2	22.8277	22.9169	0.25503
shIpmk Day 6 3	23.0186	22.7003	0.192267
shIpmk Day 8 1	24.1416	22.9085	0.101982
shIpmk Day 8 2	25.1053	22.9502	0.0538238
shIpmk Day 8 3	24.5268	23.0812	0.0880168

## Sheet: Zfp42
	Zfp42 Ct	Arbp Ct	2^-ddCt		Zfp42
shNT Day 0 1	27.3555	22.718	1.30579			average	error bar	ttest
shNT Day 0 2	27.9058	22.7054	0.883893		shNT Day 0	1.0187	0.143634
shNT Day 0 3	27.8976	22.6683	0.866416		shNT Day 2	0.242271	0.0165691
shNT Day 2 1	29.7006	22.5754	0.232794		shNT Day 4	0.040497	0.00161066
shNT Day 2 2	29.7773	22.5673	0.21951		shNT Day 6	0.0281511	0.00201382
shNT Day 2 3	29.5003	22.6129	0.27451		shNT Day 8	0.0299731	0.0131123
shNT Day 4 1	31.8119	22.2736	0.0437094		shIpmk Day 0	1.17757	0.178416	0.526097
shNT Day 4 2	31.9442	22.2297	0.0386833		shIpmk Day 2	0.269261	0.0407912	0.573006
shNT Day 4 3	31.9495	22.2504	0.0390983		shIpmk Day 4	0.103974	0.00745563	0.00113905
shNT Day 6 1	32.7059	22.449	0.0265617		shIpmk Day 6	0.122456	0.00556713	9.07871e-05
shNT Day 6 2	32.7926	22.4904	0.0257408		shIpmk Day 8	0.0747247	0.0146649	0.085267
shNT Day 6 3	32.5901	22.6087	0.0321508
shNT Day 8 1	35.3028	23.3551	0.00822731
shNT Day 8 2	32.026	22.7803	0.0535401
shNT Day 8 3	33.0056	22.8326	0.0281518
shIpmk Day 0 1	27.651	23.2457	1.53379
shIpmk Day 0 2	28.0575	23.0079	0.981367
shIpmk Day 0 3	27.6748	22.6776	1.01756
shIpmk Day 2 1	29.8222	22.8347	0.256117
shIpmk Day 2 2	29.4879	22.9325	0.345563
shIpmk Day 2 3	29.9726	22.6717	0.206104
shIpmk Day 4 1	30.412	22.138	0.104995
shIpmk Day 4 2	30.9898	22.5028	0.0905808
shIpmk Day 4 3	30.8338	22.7079	0.116347
shIpmk Day 6 1	31.1913	23.0825	0.117732
shIpmk Day 6 2	31.0461	22.9169	0.116087
shIpmk Day 6 3	30.6272	22.7003	0.13355
shIpmk Day 8 1	31.503	22.9085	0.0840826
shIpmk Day 8 2	32.4156	22.9502	0.045973
shIpmk Day 8 3	31.513	23.0812	0.0941187
