# Supplementary material for: Inositol polyphosphate multikinase physically binds to the SWI/SNF complex and modulates BRG1 occupancy in mouse embryonic stem cells
Source: eLife. 2022 May 12;11:e73523. doi: 10.7554/eLife.73523 (PMC9098221; doi:10.7554/eLife.73523)
Supplement: Figure 7—source data 2. [file elife-73523-fig7-data2.xlsx]

## Sheet: Foxa1
	Foxa1 Ct	Arbp Ct	2^-ddCt		Foxa1
shNT Day 0 1	27.9876	22.6767	0.738688			average	error bar	ttest
shNT Day 0 2	27.0648	22.6277	1.35375		shNT Day 0	1.04622	0.307531
shNT Day 2 1	28.4783	22.2335	0.386684		shNT Day 2	0.48121	0.0477605
shNT Day 2 2	28.314	22.552	0.540382		shNT Day 4	0.377002	0.0297705
shNT Day 2 3	28.5506	22.7237	0.516564		shNT Day 6	0.294766	0.0153659
shNT Day 4 1	28.8576	22.3761	0.328175		shNT Day 8	0.657522	0.0530448
shNT Day 4 2	28.9951	22.6532	0.361503		shIpmk Day 0	0.331354	0.0382575	0.0554842
shNT Day 4 3	28.5164	22.5336	0.463673		shIpmk Day 2	0.27486	0.0205585	0.0165598
shNT Day 4 4	28.728	22.3585	0.354657		shIpmk Day 4	0.16769	0.0283087	0.00435541
shNT Day 6 1	28.2002	21.6371	0.310132		shIpmk Day 6	0.15567	0.0120012	0.00238014
shNT Day 6 2	29.3464	22.6328	0.2794		shIpmk Day 8	0.559713	0.0803403	0.367103
shNT Day 8 1	28.2026	22.5374	0.577842
shNT Day 8 2	27.9504	22.4251	0.636702
shNT Day 8 3	27.4296	22.1559	0.758022
shIpmk Day 0 1	29.5855	22.8515	0.27547
shIpmk Day 0 2	29.2296	22.6846	0.314034
shIpmk Day 0 3	28.8951	22.7155	0.404558
shIpmk Day 2 1	29.3499	22.4013	0.237402
shIpmk Day 2 2	29.0325	22.4608	0.308274
shIpmk Day 2 3	29.274	22.5578	0.278904
shIpmk Day 4 1	29.6006	22.5515	0.221423
shIpmk Day 4 2	30.2556	22.3859	0.125373
shIpmk Day 4 3	29.9723	22.4205	0.156273
shIpmk Day 6 1	29.7329	22.0311	0.140843
shIpmk Day 6 2	30.0895	22.526	0.155013
shIpmk Day 6 3	30.075	22.8032	0.189758
shIpmk Day 6 4	29.9608	22.2198	0.137067
shIpmk Day 8 1	29.3101	23.1241	0.402774
shIpmk Day 8 2	28.5705	23.1145	0.668036
shIpmk Day 8 3	28.5377	22.9467	0.60833

## Sheet: Foxa2
	Foxa2 Ct	Arbp Ct	2^-ddCt		Foxa2
shNT Day 0 1	31.7552	22.6767	0.662861			average	error bar	ttest
shNT Day 0 2	30.5198	22.6277	1.50861		shNT Day 0	1.08574	0.422876
shNT Day 2 1	29.2546	22.2335	2.75916		shNT Day 2	4.12407	0.683857
shNT Day 2 2	28.7498	22.552	4.88226		shNT Day 4	8.98824	0.539987
shNT Day 2 3	28.9668	22.7237	4.7308		shNT Day 6	11.5988	1.06964
shNT Day 4 1	27.7122	22.3761	8.87171		shNT Day 8	25.8912	1.99813
shNT Day 4 2	27.7959	22.6532	10.144		shIpmk Day 0	0.0479283	0.0213305	0.0464218
shNT Day 4 3	27.7915	22.5336	9.36575		shIpmk Day 2	0.404086	0.0349345	0.00557013
shNT Day 4 4	27.9232	22.3585	7.57149		shIpmk Day 4	0.684027	0.177019	5.4611e-05
shNT Day 6 1	26.7261	21.6371	10.5291		shIpmk Day 6	3.89745	0.252887	0.00052559
shNT Day 6 2	27.4549	22.6328	12.6684		shIpmk Day 8	21.7471	4.37283	0.437314
shNT Day 8 1	26.4215	22.5374	24.2708
shNT Day 8 2	26.3534	22.4251	23.5379
shNT Day 8 3	25.7408	22.1559	29.865
shIpmk Day 0 1	37.0347	22.8515	0.0192634
shIpmk Day 0 2	36.0106	22.6846	0.0348983
shIpmk Day 0 3	34.6808	22.7155	0.0896234
shIpmk Day 2 1	32.4653	22.4013	0.334793
shIpmk Day 2 2	32.1604	22.4608	0.43098
shIpmk Day 2 3	32.2064	22.5578	0.446485
shIpmk Day 4 1	31.265	22.5515	0.853721
shIpmk Day 4 2	32.4702	22.3859	0.330089
shIpmk Day 4 3	31.1095	22.4205	0.868271
shIpmk Day 6 1	28.4205	22.0311	4.27496
shIpmk Day 6 2	29.2102	22.526	3.48463
shIpmk Day 6 3	29.1538	22.8032	4.39147
shIpmk Day 6 4	28.9232	22.2198	3.43872
shIpmk Day 8 1	27.4975	23.1241	17.2905
shIpmk Day 8 2	26.6694	23.1145	30.4923
shIpmk Day 8 3	27.3061	22.9467	17.4586

## Sheet: Gata6
	Gata6 Ct	Arbp Ct	2^-ddCt		Gata6
shNT Day 0 1	28.7169	22.6767	0.85088			average	error bar	ttest
shNT Day 0 2	28.202	22.6277	1.17525		shNT Day 0	1.01307	0.162187
shNT Day 2 1	26.49	22.2335	2.92966		shNT Day 2	3.05187	0.302661
shNT Day 2 2	26.5008	22.552	3.62641		shNT Day 4	2.0521	0.123139
shNT Day 2 3	27.1527	22.7237	2.59955		shNT Day 6	1.96831	0.105057
shNT Day 4 1	27.2822	22.3761	1.86762		shNT Day 8	1.31201	0.188591
shNT Day 4 2	27.6019	22.6532	1.8133		shIpmk Day 0	0.163816	0.0205623	0.00633776
shNT Day 4 3	27.1786	22.5336	2.23812		shIpmk Day 2	0.326424	0.0892674	0.000988158
shNT Day 4 4	26.9709	22.3585	2.28937		shIpmk Day 4	0.334278	0.121293	0.000200283
shNT Day 6 1	26.5466	21.6371	1.86325		shIpmk Day 6	0.407666	0.0854258	0.000404449
shNT Day 6 2	27.3881	22.6328	2.07337		shIpmk Day 8	0.195494	0.0230959	0.00418978
shNT Day 8 1	28.2565	22.5374	1.06299
shNT Day 8 2	27.98	22.4251	1.19117
shNT Day 8 3	27.2131	22.1559	1.68186
shIpmk Day 0 1	31.6837	22.8515	0.12285
shIpmk Day 0 2	30.9564	22.6846	0.18118
shIpmk Day 0 3	30.9384	22.7155	0.187419
shIpmk Day 2 1	30.5126	22.4013	0.202494
shIpmk Day 2 2	30.1196	22.4608	0.277093
shIpmk Day 2 3	29.366	22.5578	0.499686
shIpmk Day 4 1	29.7325	22.5515	0.385889
shIpmk Day 4 2	31.4697	22.3859	0.103197
shIpmk Day 4 3	29.1886	22.4205	0.513747
shIpmk Day 6 1	29.0278	22.0311	0.438472
shIpmk Day 6 2	30.3172	22.526	0.252795
shIpmk Day 6 3	29.2647	22.8032	0.635441
shIpmk Day 6 4	29.7451	22.2198	0.303956
shIpmk Day 8 1	31.3667	23.1241	0.184888
shIpmk Day 8 2	30.9823	23.1145	0.239731
shIpmk Day 8 3	31.3811	22.9467	0.161862

## Sheet: Sox17
	Sox17 Ct	Arbp Ct	2^-ddCt		Sox17
shNT Day 0 1	32.02	22.6767	0.792433			average	error bar	ttest
shNT Day 0 2	31.2998	22.6277	1.26194		shNT Day 0	1.02718	0.234752
shNT Day 2 1	30.0474	22.2335	2.2876		shNT Day 2	2.54038	0.282516
shNT Day 2 2	29.9254	22.552	3.10441		shNT Day 4	2.69282	0.190849
shNT Day 2 3	30.5749	22.7237	2.22914		shNT Day 6	6.93507	0.222177
shNT Day 4 1	30.279	22.3761	2.15076		shNT Day 8	7.54131	0.34881
shNT Day 4 2	30.2258	22.6532	2.70409		shIpmk Day 0	0.169191	0.0200553	0.0167223
shNT Day 4 3	29.9603	22.5336	2.99178		shIpmk Day 2	0.293712	0.0377456	0.00140059
shNT Day 4 4	29.818	22.3585	2.92465		shIpmk Day 4	0.403714	0.0523435	0.000174968
shNT Day 6 1	27.8054	21.6371	7.15725		shIpmk Day 6	1.16625	0.292096	0.000230217
shNT Day 6 2	28.8936	22.6328	6.71289		shIpmk Day 8	0.795213	0.135559	5.56694e-05
shNT Day 8 1	28.5561	22.5374	7.93917
shNT Day 8 2	28.4622	22.4251	7.83864
shNT Day 8 3	28.3883	22.1559	6.84611
shIpmk Day 0 1	34.7758	22.8515	0.132439
shIpmk Day 0 2	34.218	22.6846	0.173654
shIpmk Day 0 3	34.0345	22.7155	0.201481
shIpmk Day 2 1	33.6038	22.4013	0.21843
shIpmk Day 2 2	33.0834	22.4608	0.326499
shIpmk Day 2 3	33.1381	22.5578	0.336209
shIpmk Day 4 1	32.8471	22.5515	0.409562
shIpmk Day 4 2	33.082	22.3859	0.310271
shIpmk Day 4 3	32.4535	22.4205	0.491311
shIpmk Day 6 1	30.714	22.0311	1.25254
shIpmk Day 6 2	31.958	22.526	0.745171
shIpmk Day 6 3	30.8406	22.8032	1.95936
shIpmk Day 6 4	31.7258	22.2198	0.707927
shIpmk Day 8 1	32.9137	23.1241	0.581627
shIpmk Day 8 2	32.5231	23.1145	0.757388
shIpmk Day 8 3	31.8886	22.9467	1.04662
