# Supplementary material for: Inositol polyphosphate multikinase physically binds to the SWI/SNF complex and modulates BRG1 occupancy in mouse embryonic stem cells
Source: eLife. 2022 May 12;11:e73523. doi: 10.7554/eLife.73523 (PMC9098221; doi:10.7554/eLife.73523)
Supplement: Figure 7—source data 3. [file elife-73523-fig7-data3.xlsx]

## Sheet: 시트1
	Brg1 Ct	Bactin Ct	2^-ddCt		Brg1
EgfpKD 1	27.9169	22.6869	1.15081			average	error bar	ttest
EgfpKD 2	27.8649	22.5066	1.05299		EgfpKD	1.00967	0.0964489
EgfpKD 3	28.1921	22.4823	0.825229		Brg1KD 1	0.174664	0.00961139	0.000997971
Brg1KD1 1	29.9367	22.0748	0.185665		Brg1KD 2	0.350931	0.0533199	0.00393665
Brg1KD1 2	30.0495	21.9319	0.155512
Brg1KD1 3	30.1666	22.2824	0.182816
Brg1KD2 1	29.3695	22.5424	0.380388
Brg1KD2 2	29.8043	22.3568	0.247442
Brg1KD2 3	29.0915	22.4242	0.424961
	Phactr3 Ct	Bactin Ct	2^-ddCt		Phactr3
EgfpKD 1	30.135	22.6869	1.25075			average	error bar	ttest
EgfpKD 2	30.1901	22.5066	1.06248		EgfpKD	1.02191	0.145254
EgfpKD 3	30.6634	22.4823	0.752504		Brg1KD 1	0.265489	0.0186391	0.00667392
Brg1KD1 1	31.9714	22.0748	0.22913		Brg1KD 2	0.478362	0.106182	0.0391263
Brg1KD1 2	31.4847	21.9319	0.290792
Brg1KD1 3	31.9076	22.2824	0.276545
Brg1KD2 1	30.8471	22.5424	0.690702
Brg1KD2 2	31.5642	22.3568	0.369439
Brg1KD2 3	31.6103	22.4242	0.374944
	Foxa2 Ct	Bactin Ct	2^-ddCt		Foxa2
EgfpKD 1	33.2147	22.6869	1.3425			average	error bar	ttest
EgfpKD 2	33.3673	22.5066	1.06588		EgfpKD	1.03574	0.186419
EgfpKD 3	33.952	22.4823	0.69884		Brg1KD 1	0.397464	0.0994785	0.0391363
Brg1KD1 1	33.9028	22.0748	0.54514		Brg1KD 2	0.446601	0.174336	0.0821929
Brg1KD1 2	35.1488	21.9319	0.208163
Brg1KD1 3	34.4225	22.2824	0.439091
Brg1KD2 1	35.8288	22.5424	0.198366
Brg1KD2 2	34.7887	22.3568	0.358673
Brg1KD2 3	33.7302	22.4242	0.782765
	Gata6 Ct	Bactin Ct	2^-ddCt		Gata6
EgfpKD 1	30.0212	22.3679	0.923116			average	error bar	ttest
EgfpKD 2	29.5533	22.0719	1.04002		EgfpKD	1.00158	0.0392347
EgfpKD 3	29.7997	22.3206	1.04161		Brg1KD 1	0.419511	0.0238082	0.000222568
Brg1KD1 1	30.9328	22.179	0.4305		Brg1KD 2	0.404249	0.0126729	0.000131978
Brg1KD1 2	30.7025	22.0258	0.45414
Brg1KD1 3	30.891	21.9338	0.373893
Brg1KD2 1	31.1594	22.2256	0.380026
Brg1KD2 2	30.9348	22.1102	0.409899
Brg1KD2 3	30.9152	22.1354	0.422822
	Sox17 Ct	Bactin Ct	2^-ddCt		Sox17
EgfpKD 1	35.9798	22.3679	0.981531			average	error bar	ttest
EgfpKD 2	35.7602	22.0719	0.930947		EgfpKD	1.00229	0.0483093
EgfpKD 3	35.7755	22.3206	1.09439		Brg1KD 1	0.527812	0.0386939	0.00155664
Brg1KD1 1	36.6144	22.179	0.55462		Brg1KD 2	0.502102	0.0784497	0.00558329
Brg1KD1 2	36.4034	22.0258	0.577278
Brg1KD1 3	36.6659	21.9338	0.451537
Brg1KD2 1	36.4142	22.2256	0.658122
Brg1KD2 2	36.9825	22.1102	0.409724
Brg1KD2 3	36.9099	22.1354	0.438459
