# Supplementary material for: Inositol polyphosphate multikinase physically binds to the SWI/SNF complex and modulates BRG1 occupancy in mouse embryonic stem cells
Source: eLife. 2022 May 12;11:e73523. doi: 10.7554/eLife.73523 (PMC9098221; doi:10.7554/eLife.73523)
Supplement: Supplementary file 1. [file elife-73523-supp1.xlsx]

## Sheet: sheet1
Supplementary file 1. Yeast two-hybrid screening assay using IPMK as bait
Screening 1	No.	Gene Symbol	Description	GenBank
	1	CLU	Clusterin	NM_001831
	2	HSPD1	Heat Shock 60kDa Protein 1 (Chaperonin)	NM_199440
	3	PSMD2	Proteasome (Prosome, Macropain) 26S Subunit, non-ATPase, 2	NM_002808
	4	PCDHGC4	Protocadherin Gamma Subfamily C, 4	NM_018928
	5	KHDRBS1	KH Domain Containing, RNA Binding, Signal Transduction Associated 1	NM_006559
	6	SMARCB1	SWI/SNF Related, Matrix Associated, Actin Dependent Regulator of Chromatin, Subfamily b, Member 1	NM_001007468
	7	CTSD	Cathepsin D	NM_001909
	8	CYP46A1	Cytochrome P450, Family 46, Subfamily A, Polypeptide 1	NM_006668
	9	RNF208	Ring Finger Protein 208	NM_031297
	10	SPARCL1	SPARC-like 1 (hevin)	NM_004684
	11	COL11A2	Collagen, Type XI, Alpha 2	NM_080681
	12	TNRC6B	Trinucleotide Repeat Containing 6B	NM_001162501
	13	DLG4	Discs, Large Homolog 4	NM_001128827
	14	RBM5	RNA Binding Motif Protein 5	NM_005778
	15	ATRX	Alpha Thalassemia/Mental Retardation Syndrome X-linked	NM_138270
	16	GAPDH	Glyceraldehyde-3-phosphate Dehydrogenase	NM_001256799
	17	B4GALNT1	Beta-1,4-N-acetyl-galactosaminyl Transferase 1	NM_001478
	18	DRG2	Developmentally Regulated GTP Binding Protein 2	NM_001388
	19	PLD3	Phospholipase D Family, Member 3	NM_012268
	20	GLUL	Glutamate-ammonia Ligase	NM_001033056
	21	APLP1	Amyloid Beta (A4) Precursor-like Protein 1	NM_005166
	22	SEPT4	Septin 4	NM_004574
	23	PSMF1	Proteasome (Prosome, Macropain) Inhibitor Subunit 1 (PI31)	NM_178578
Screening 2	No.	Gene Symbol	Description	GenBank
	1	ENO2	Enolase 2 (Gamma, Neuronal)	NM_001975
	2	MAP1A	Microtubule-associated Protein 1A	NM_002373
	3	WSCD2	WSC Domain Containing 2	NM_014653
	4	MIF4GD	MIF4G Domain Containing	NM_001242501
	5	HTRA2	HtrA Serine Peptidase 2	NM_013247
	6	ATP5D	ATP Synthase, H+ Transporting, Mitochondrial F1 Complex, Delta Subunit	NM_001001975
	7	ACTB	Actin, Beta	NM_001101
	8	NEURL	Neuralized Homolog (Drosophila)	NM_004210
	9	SWI5	SWI5 Recombination Repair Homolog (yeast)	NM_001040011
	10	GPANK1	G Patch Domain and Ankyrin Repeats 1	NM_001199240
	11	SLIT3	Slit Homolog 3 (Drosophila)	NM_003062
	12	BAI2	Brain-specific Angiogenesis Inhibitor 2	NM_001703
	13	TNNI3K	TNNI3 Interacting Kinase	NM_015978
	14	SMARCB1	SWI/SNF Related, Matrix Associated, Actin Dependent Regulator of Chromatin, Subfamily b, Member 1	NM_001007468
	15	YBX2	Y box binding protein 2	NM_015982
	16	PSMD8	Proteasome (Prosome, Macropain) 26S Subunit, non-ATPase, 8	NM_002812
	17	MDH1	Malate Dehydrogenase 1, NAD (soluble)	NM_001199112
	18	SEPT8	Septin 8	NM_001098812
	19	RPLP0	Ribosomal Protein, Large, P0	NM_001002
	20	YWHAH	Tyrosine 3-Monooxygenase/Tryptophan 5-Monooxygenase Activation Protein, Eta Polypeptide	NM_003405
	21	FEZ2	Fasciculation And Elongation Protein Zeta 2 (Zygin II)	NM_001042548
	22	EHMT2	Euchromatic Histone-Lysine N-Methyltransferase 2	NM_025256
	23	ACTA2	Actin, Alpha 2, Smooth Muscle, Aorta	NM_001613
	24	PGLS	6-Phosphogluconolactonase	NM_012088
	25	FAM3A	Family With Sequence Similarity 3, Member A	NM_001171132
	26	NFS1	NFS1 Nitrogen Fixation 1 Homolog (S. cerevisiae)	NM_001198989
	27	MPP1	Membrane Protein, Palmitoylated 1, 55kD	NM_001166462
	28	SGSH	N-Sulfoglucosamine Sulfohydrolase	NM_000199
	29	FAM3C	Family With Sequence Similarity 3, Member C	NM_001040020
	30	TNC	Tenascin C	NM_002160
	31	COASY	CoA Synthase	NM_001042532
	32	GFAP	Glial Fibrillary Acidic Protein	NM_001242376
	33	HNRNPH1	Heterogeneous Nuclear Ribonucleoprotein H1 (H)	NM_001257293
	34	NEUROD2	Neuronal Differentiation 2	NM_006160
	35	TARS2	Sapiens Threonyl-tRNA Synthetase 2	NM_025150
	36	BAI3	Brain-specific Angiogenesis Inhibitor 3	NM_001704
