# Supplementary material for: Inositol polyphosphate multikinase physically binds to the SWI/SNF complex and modulates BRG1 occupancy in mouse embryonic stem cells
Source: eLife. 2022 May 12;11:e73523. doi: 10.7554/eLife.73523 (PMC9098221; doi:10.7554/eLife.73523)
Supplement: Supplementary file 2. [file elife-73523-supp2.xlsx]

## Sheet: Supplementary Table 3
Supplementary file 2. Enriched protein complex-based sets from APEX2-mediated proximity labeling
Complex name	Set size	Candiates contained	q-value
BRG1-SIN3A-HDAC containing SWI/SNF remodeling complex I	11	7 (63.6%)	4.83e-07
BRG1-SIN3A complex	14	7 (50.0%)	4e-06
Brg1-associated complex II	7	5 (71.4%)	1.6e-05
BRG1-associated complex	9	5 (55.6%)	6.98e-05
BAF complex	9	5 (55.6%)	6.98e-05
PBAF complex (Polybromo- and BAF containing complex)	9	5 (55.6%)	6.98e-05
BRM-SIN3A complex	15	6 (40.0%)	8.1e-05
EBAFa complex	10	5 (50.0%)	0.000104312
BAF complex	13	5 (38.5%)	0.000329586
Brg1-based SWI/SNF complex	4	3 (75.0%)	0.000720336
EBAFb complex	10	4 (40.0%)	0.00111022
BRM-associated complex	10	4 (40.0%)	0.00111022
