# Supplementary material for: Inositol polyphosphate multikinase physically binds to the SWI/SNF complex and modulates BRG1 occupancy in mouse embryonic stem cells
Source: eLife. 2022 May 12;11:e73523. doi: 10.7554/eLife.73523 (PMC9098221; doi:10.7554/eLife.73523)
Supplement: Supplementary file 3. [file elife-73523-supp3.xlsx]

## Sheet: RT-GeneqPCR primers
Supplementary file 3. Appendix_ Sequence-based reagents
Gene	Orientation	Sequence (5'->3')
Bactin	F	GACAGGATGCAGAAAGGAGATTAC
	R	GCTGATCCACATCTGCTGGAA
Arbp	F	TCACTGTGCCAGCTCAGAAC
	R	AATTTCAATGGTGCCTGTGG
Ipmk	F	CCAAAATATTATGGCATCTG
	R	TATCTTTACATCCATTATAC
Rasl12	F	CATCACCTGGTGGTAGAAAGAG
	R	TCCAAGTGTCTTTGCCCTATC
Phactr3	F	TGGAGGAACTGGAGAGAAGAA
	R	CAACAGTGGGTCTCTGGTTAAG
Foxa1	F	CGCTGCAGTACTCTCCTTATG
	R	TTTAGCACGGGTCTGGAATAC
Foxa2	F	GGAGCCGTGAAGATGGAAG
	R	TGTGTTCATGCCATTCATCC
Gata6	F	CGGTCTCTACAGCAAGATGAAT
	R	GCTCACCCTCAGCATTTCTA
Sox17	F	CCGAGATGGGTCTTCCCTAC
	R	CGTCAAATGTCGGGGTAGTT
Me2	F	TGCGGCCCAAAGAGTTATT
	R	GAGACCACTTTCCACCATTGA
Sfrp2	F	GAGACAAAGAGCAAGACCATTTAC
	R	CTTCTGTCCCATGACCAGATAC
Esrrb	F	GGCGTTCTTCAAGAGAACCA
	R	TCCGTTTGGTGATCTCACAT
Nanog	F	CTCCATTCTGAACCTGAGCTATAA
	R	GCAATGGATGCTGGGATACT
Pou5f1	F	GAAAGCGAACTAGCATTGAGAAC
	R	GCCGGTTACAGAACCATACT
Zfp42	F	ATCTTACCTGCCTCTGCCTCCTG
	R	GCTTCCTTCTTGAACAATGCCTATG
Fgf5	F	GGATTGTAGGAATACGAGGAGTTT
	R	CGCGGACGCATAGGTATTATAG
Otx2	F	GCTCTGTTTGCCAAGACCCG
	R	TGGCGGCACTTAGCTCTTCG
Zic1	F	CGCGATCCGAGCACTATG
	R	CTCCGGCTCGATCCATTTAC
Brachyury	F	GAACCTCGGATTCACATCGT
	R	TTCTTTGGCATCAAGGAAGG
Cd34	F	AGGGTATCTGCCTGGAACTAA
	R	AACCTCAGACTGGGCTAGAA
Gata2	F	GACGACAACCACCACCTTAT
	R	TGCTGGACATCTTCCGATTC
Runx1	F	CGCCACAAGTTGCCACCTAC
	R	GCTCCAATTCACTGAGCCGC
