# Supplementary figures and images for: Inositol polyphosphate multikinase physically binds to the SWI/SNF complex and modulates BRG1 occupancy in mouse embryonic stem cells
Source: eLife journal article supplement (doi:10.7554/elife.73523), 2022-04-27

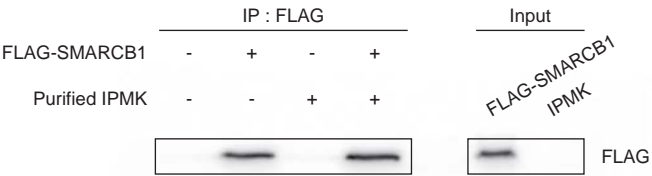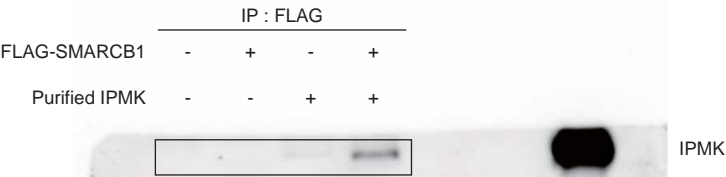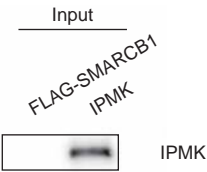

Supplement: fig2-data1 [file elife-73523-fig2-data1-v1.zip]

Figure 2B  
Top Left

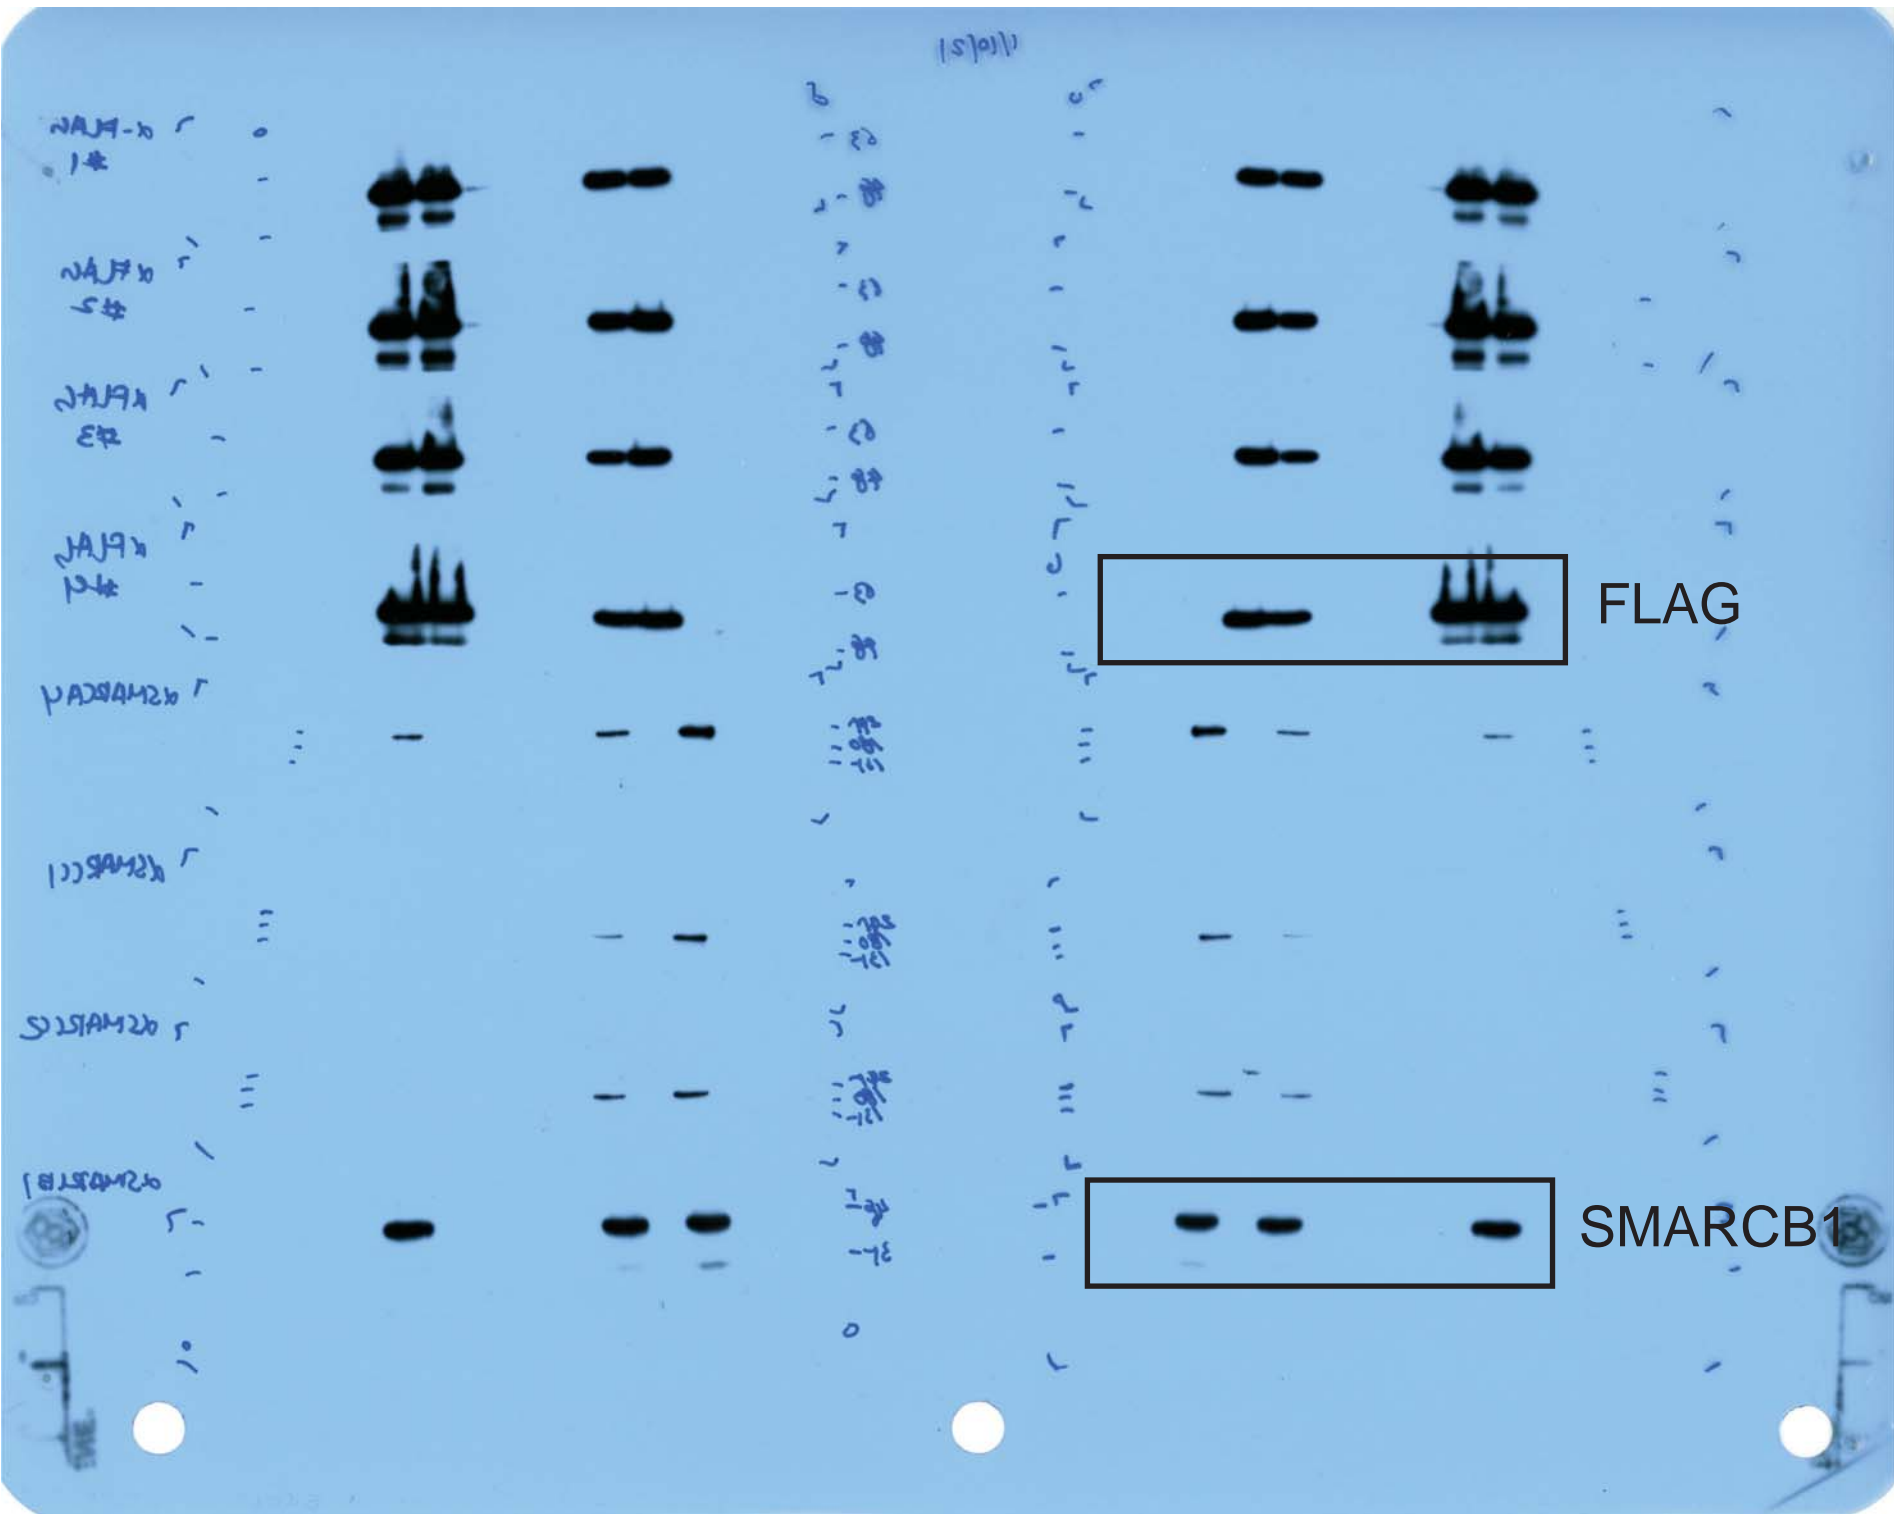

Figure 2B  
Top Right

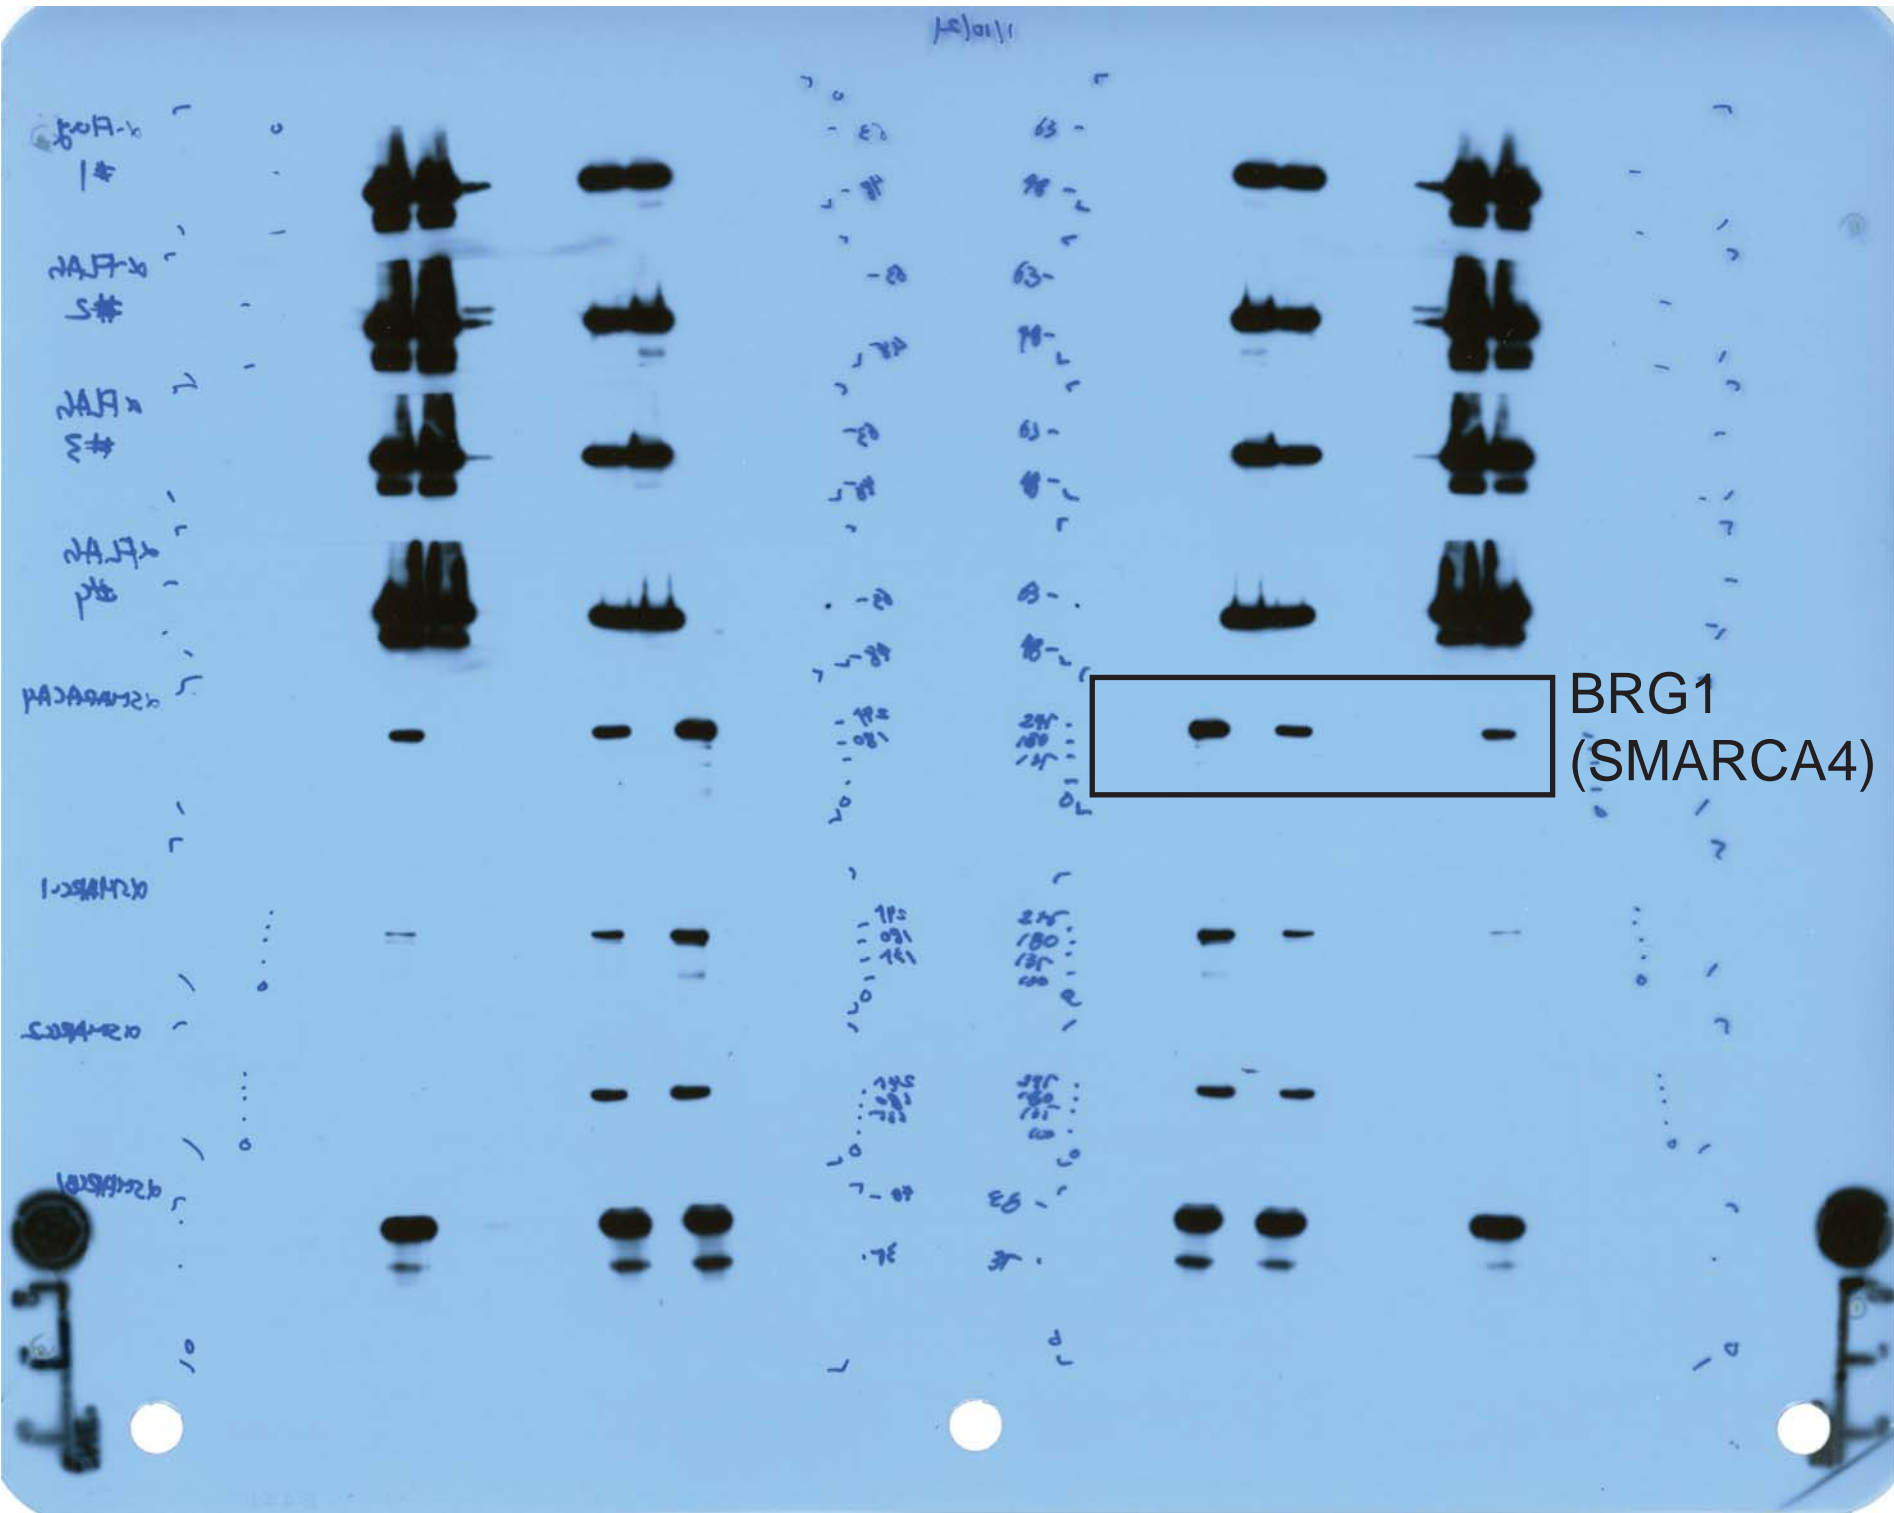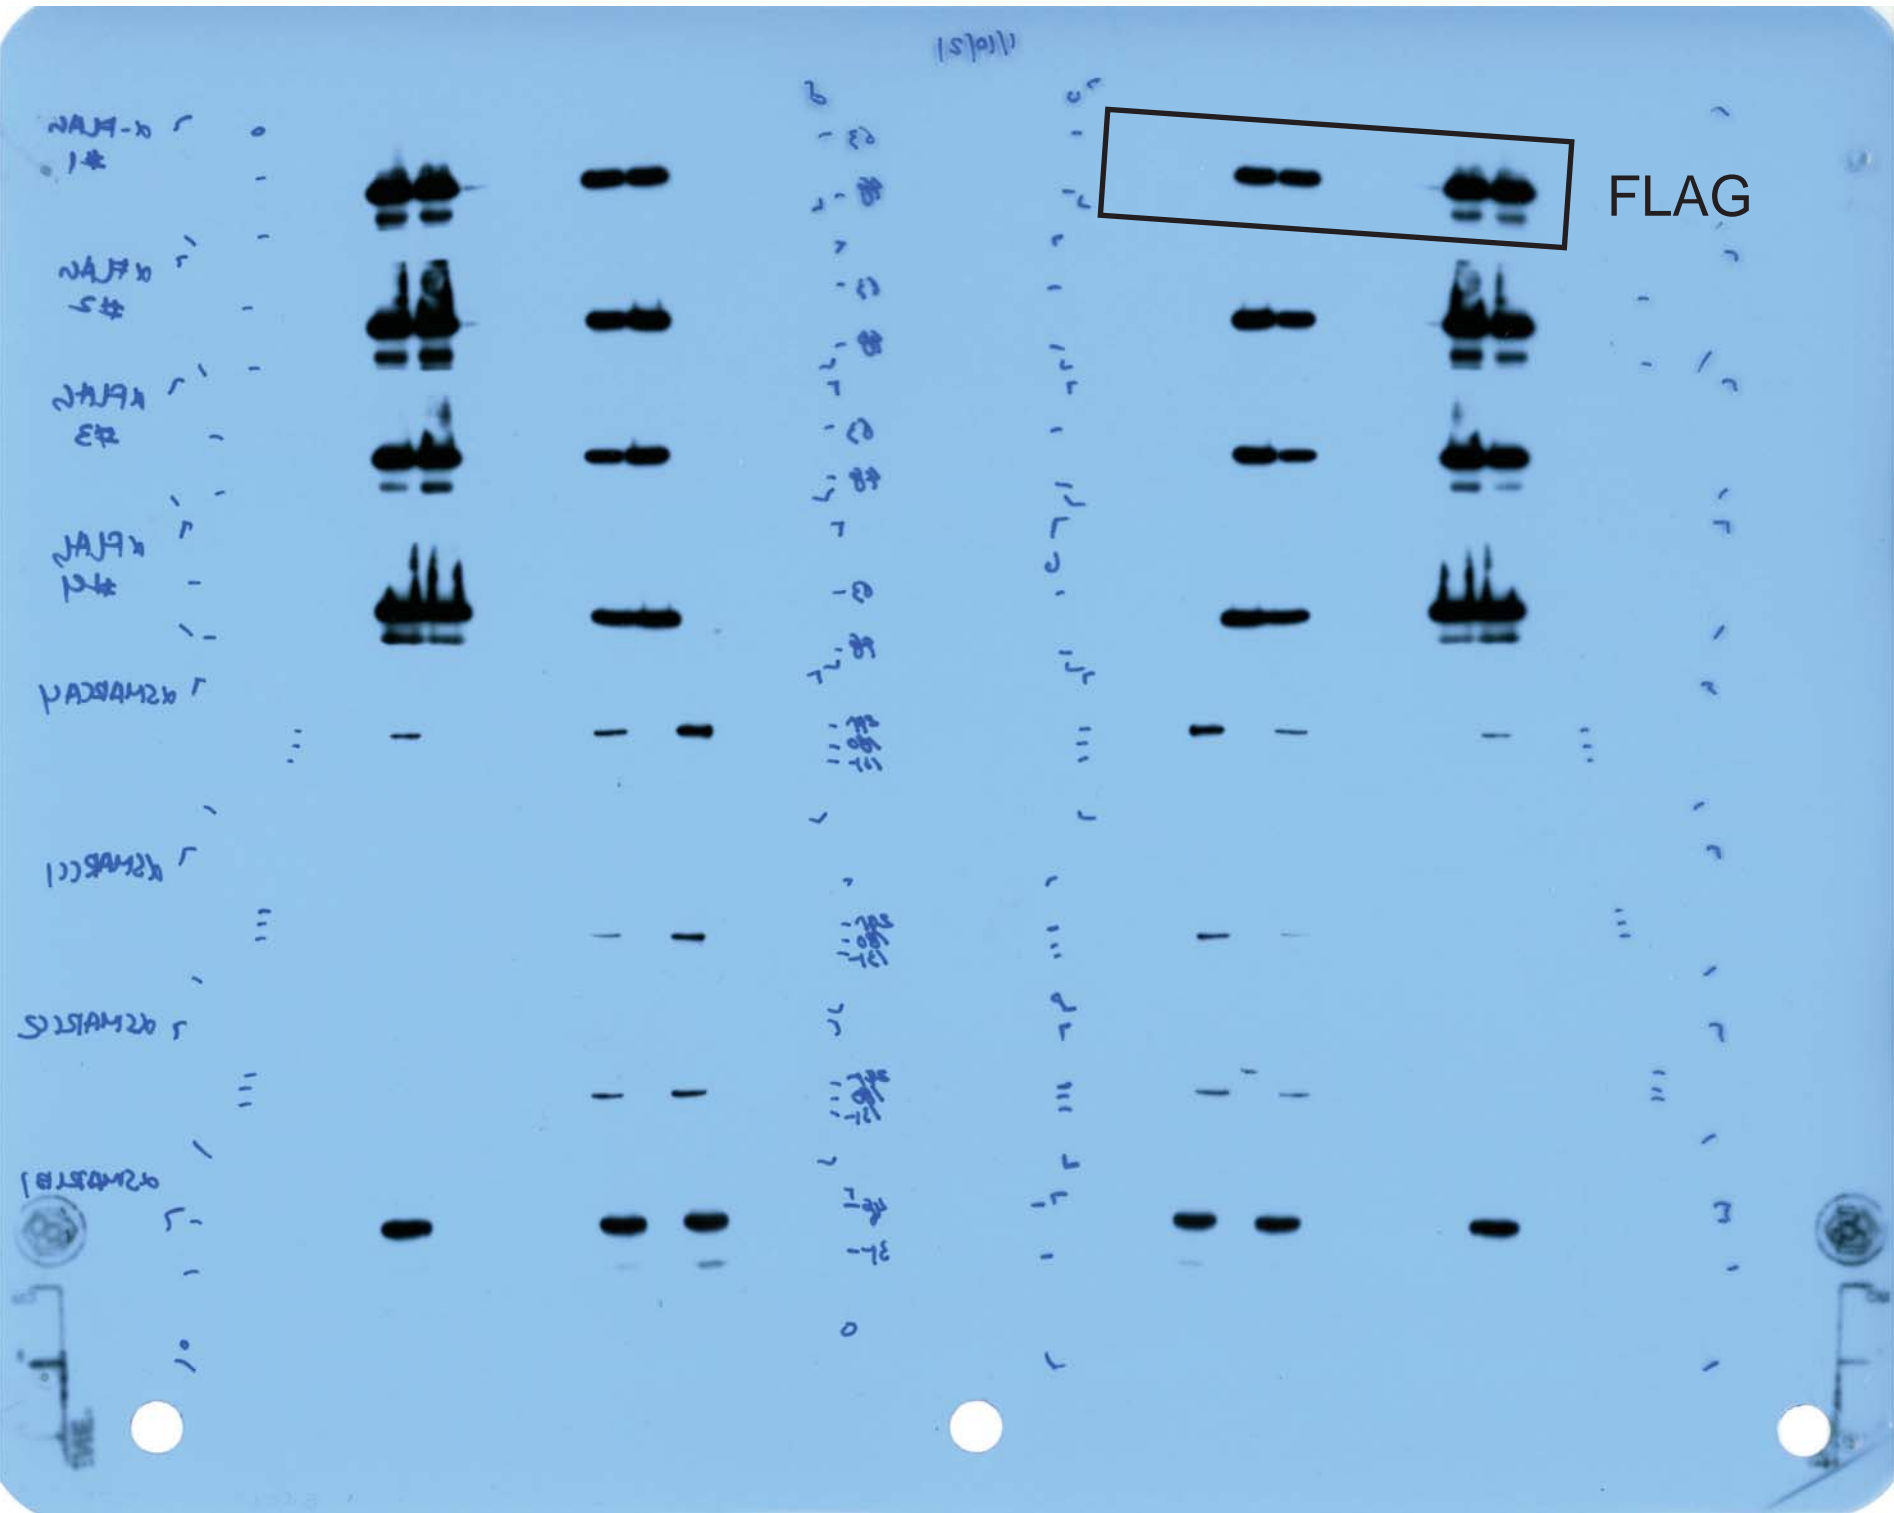

Figure 2B  
Bottom Left

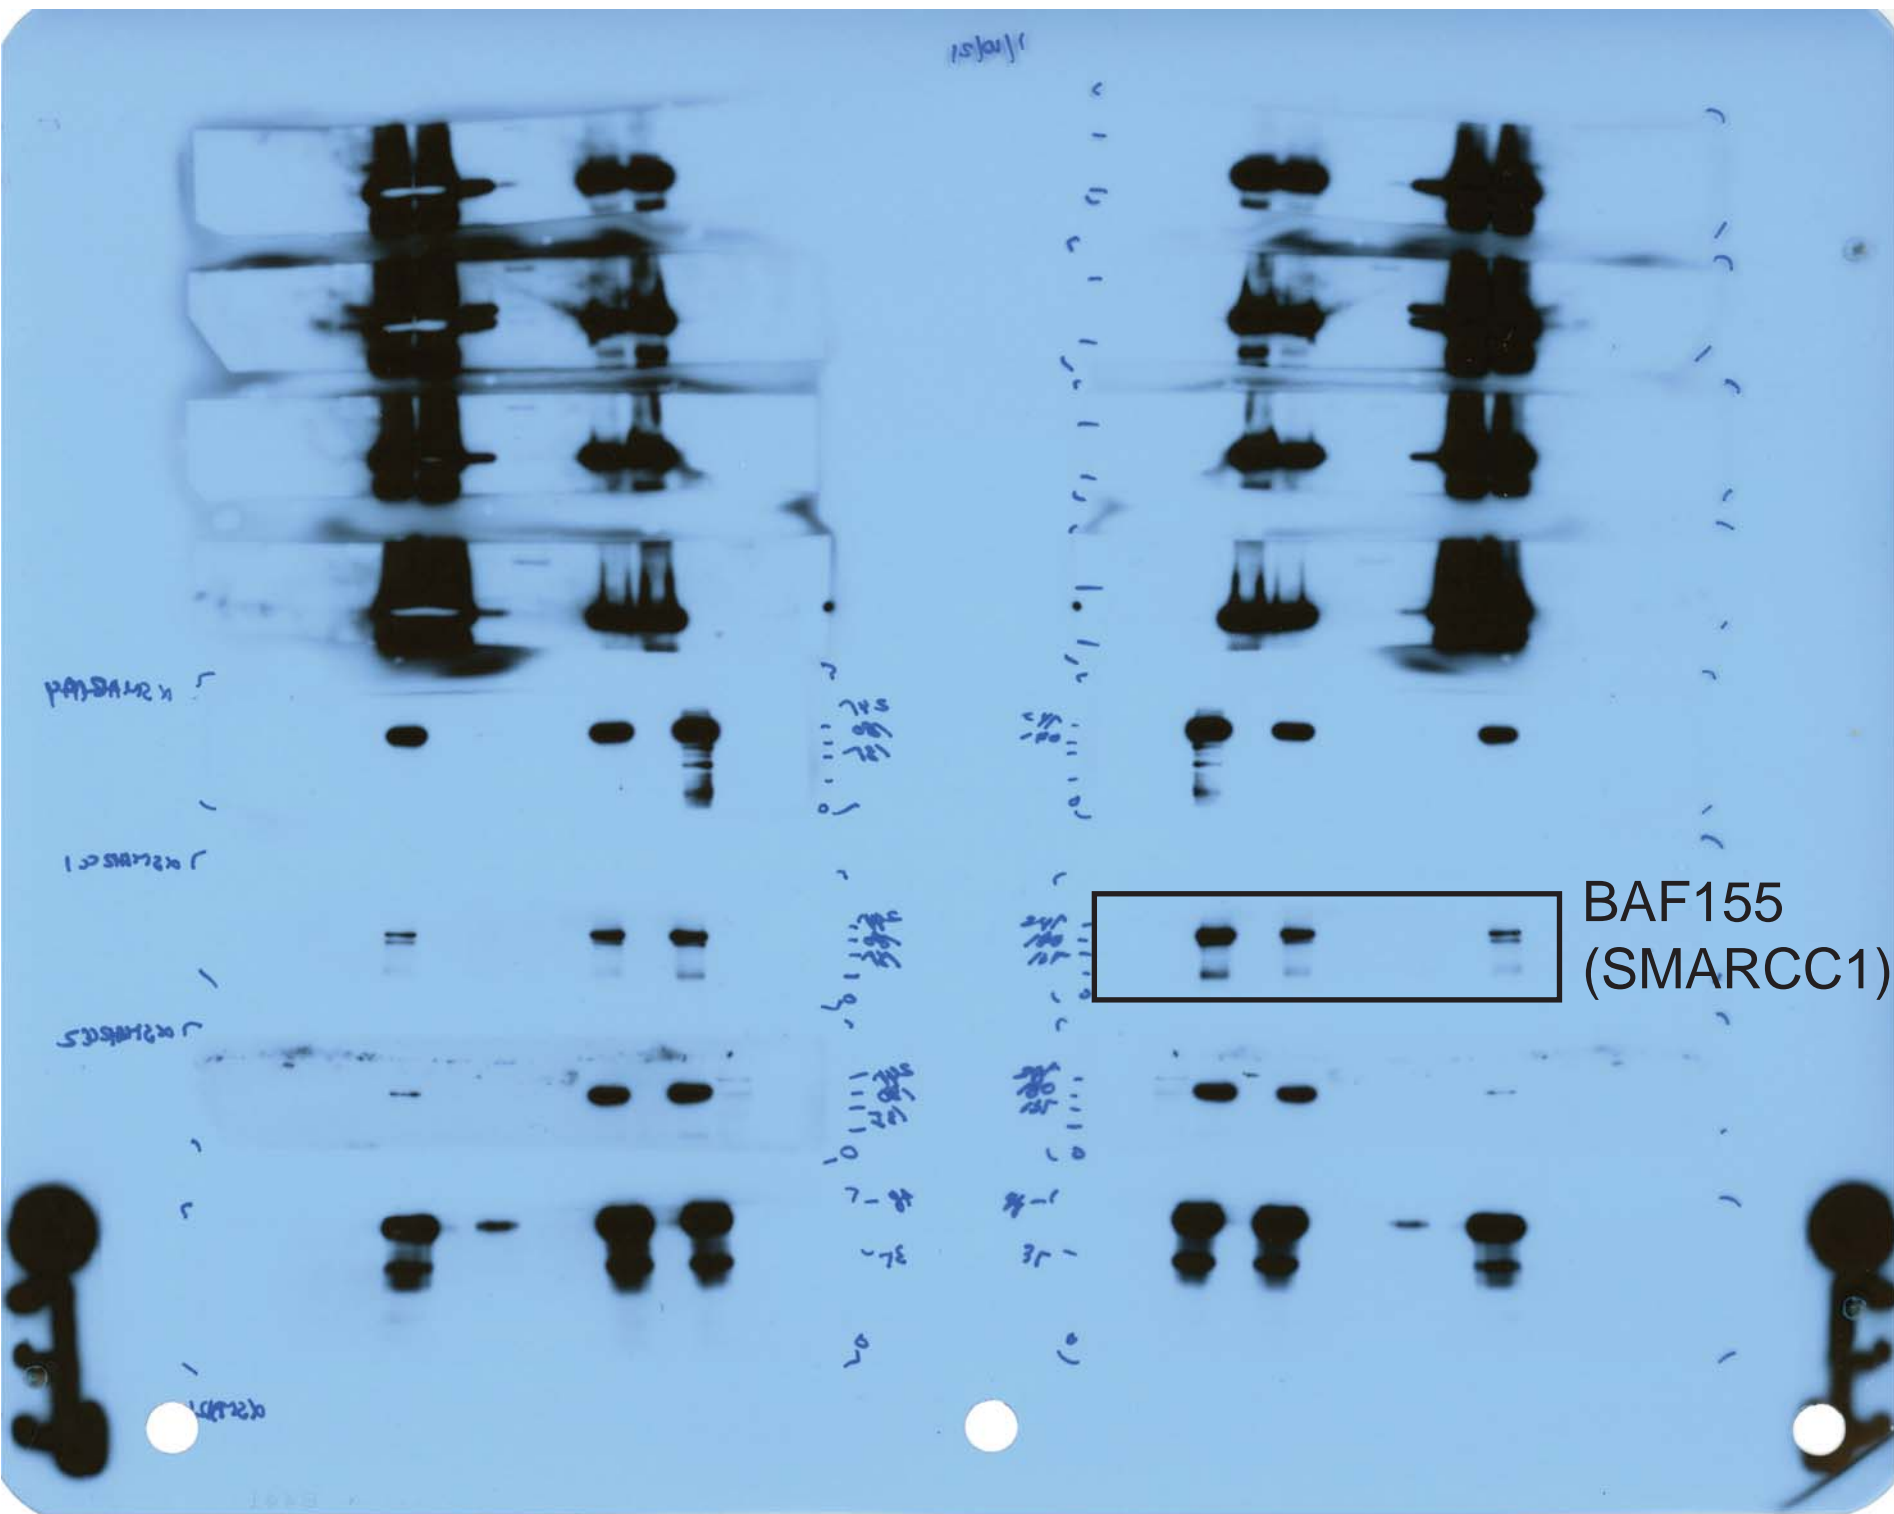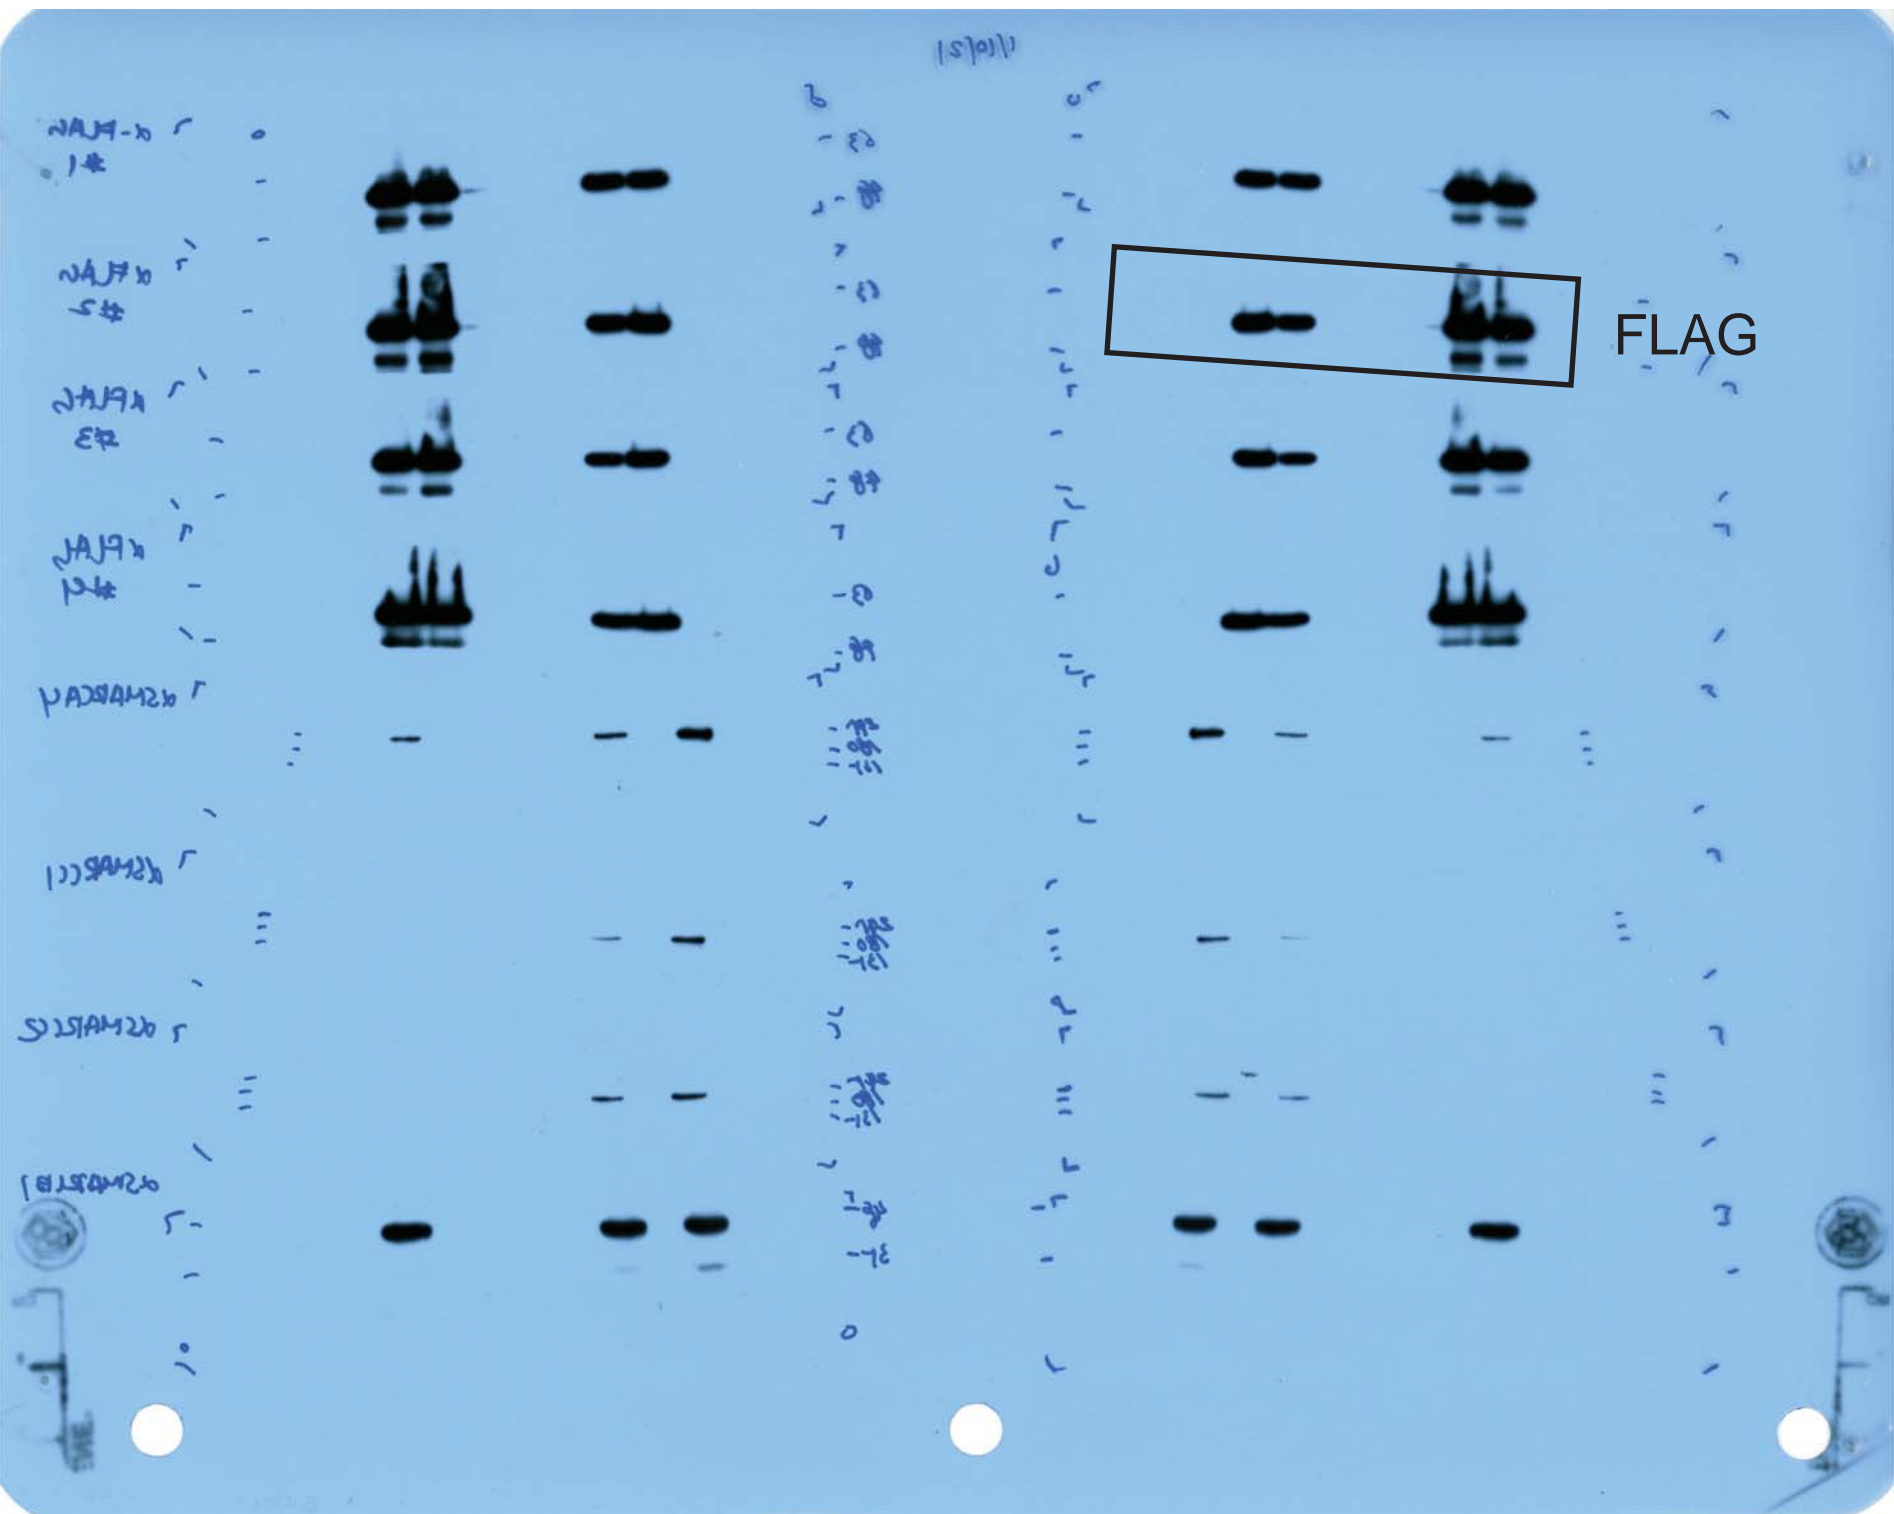

Figure 2B  
Bottom Right

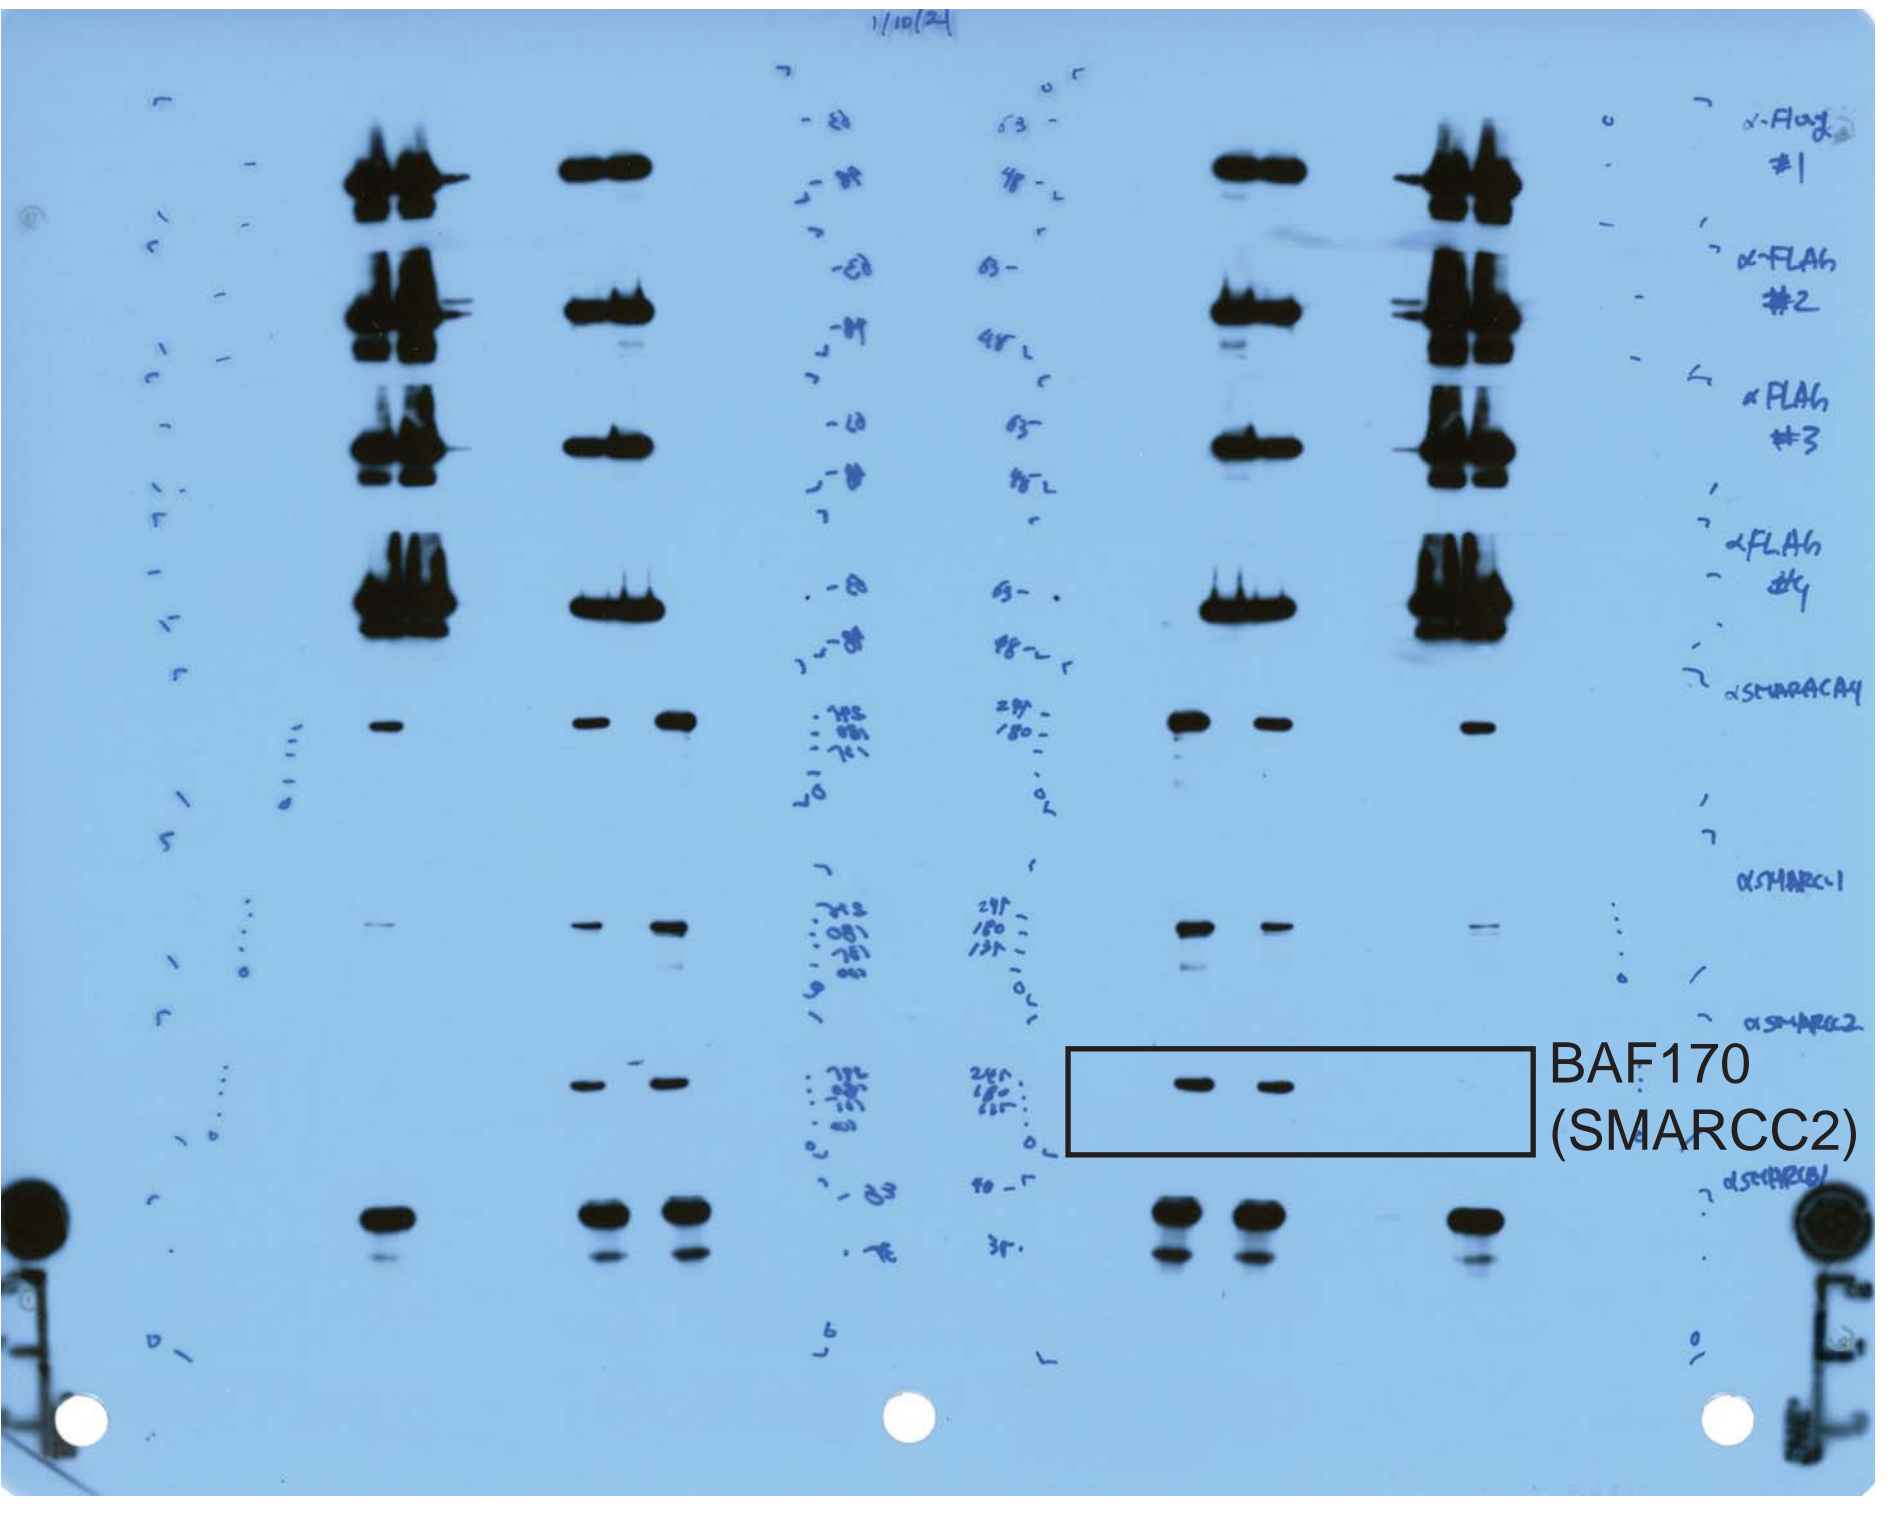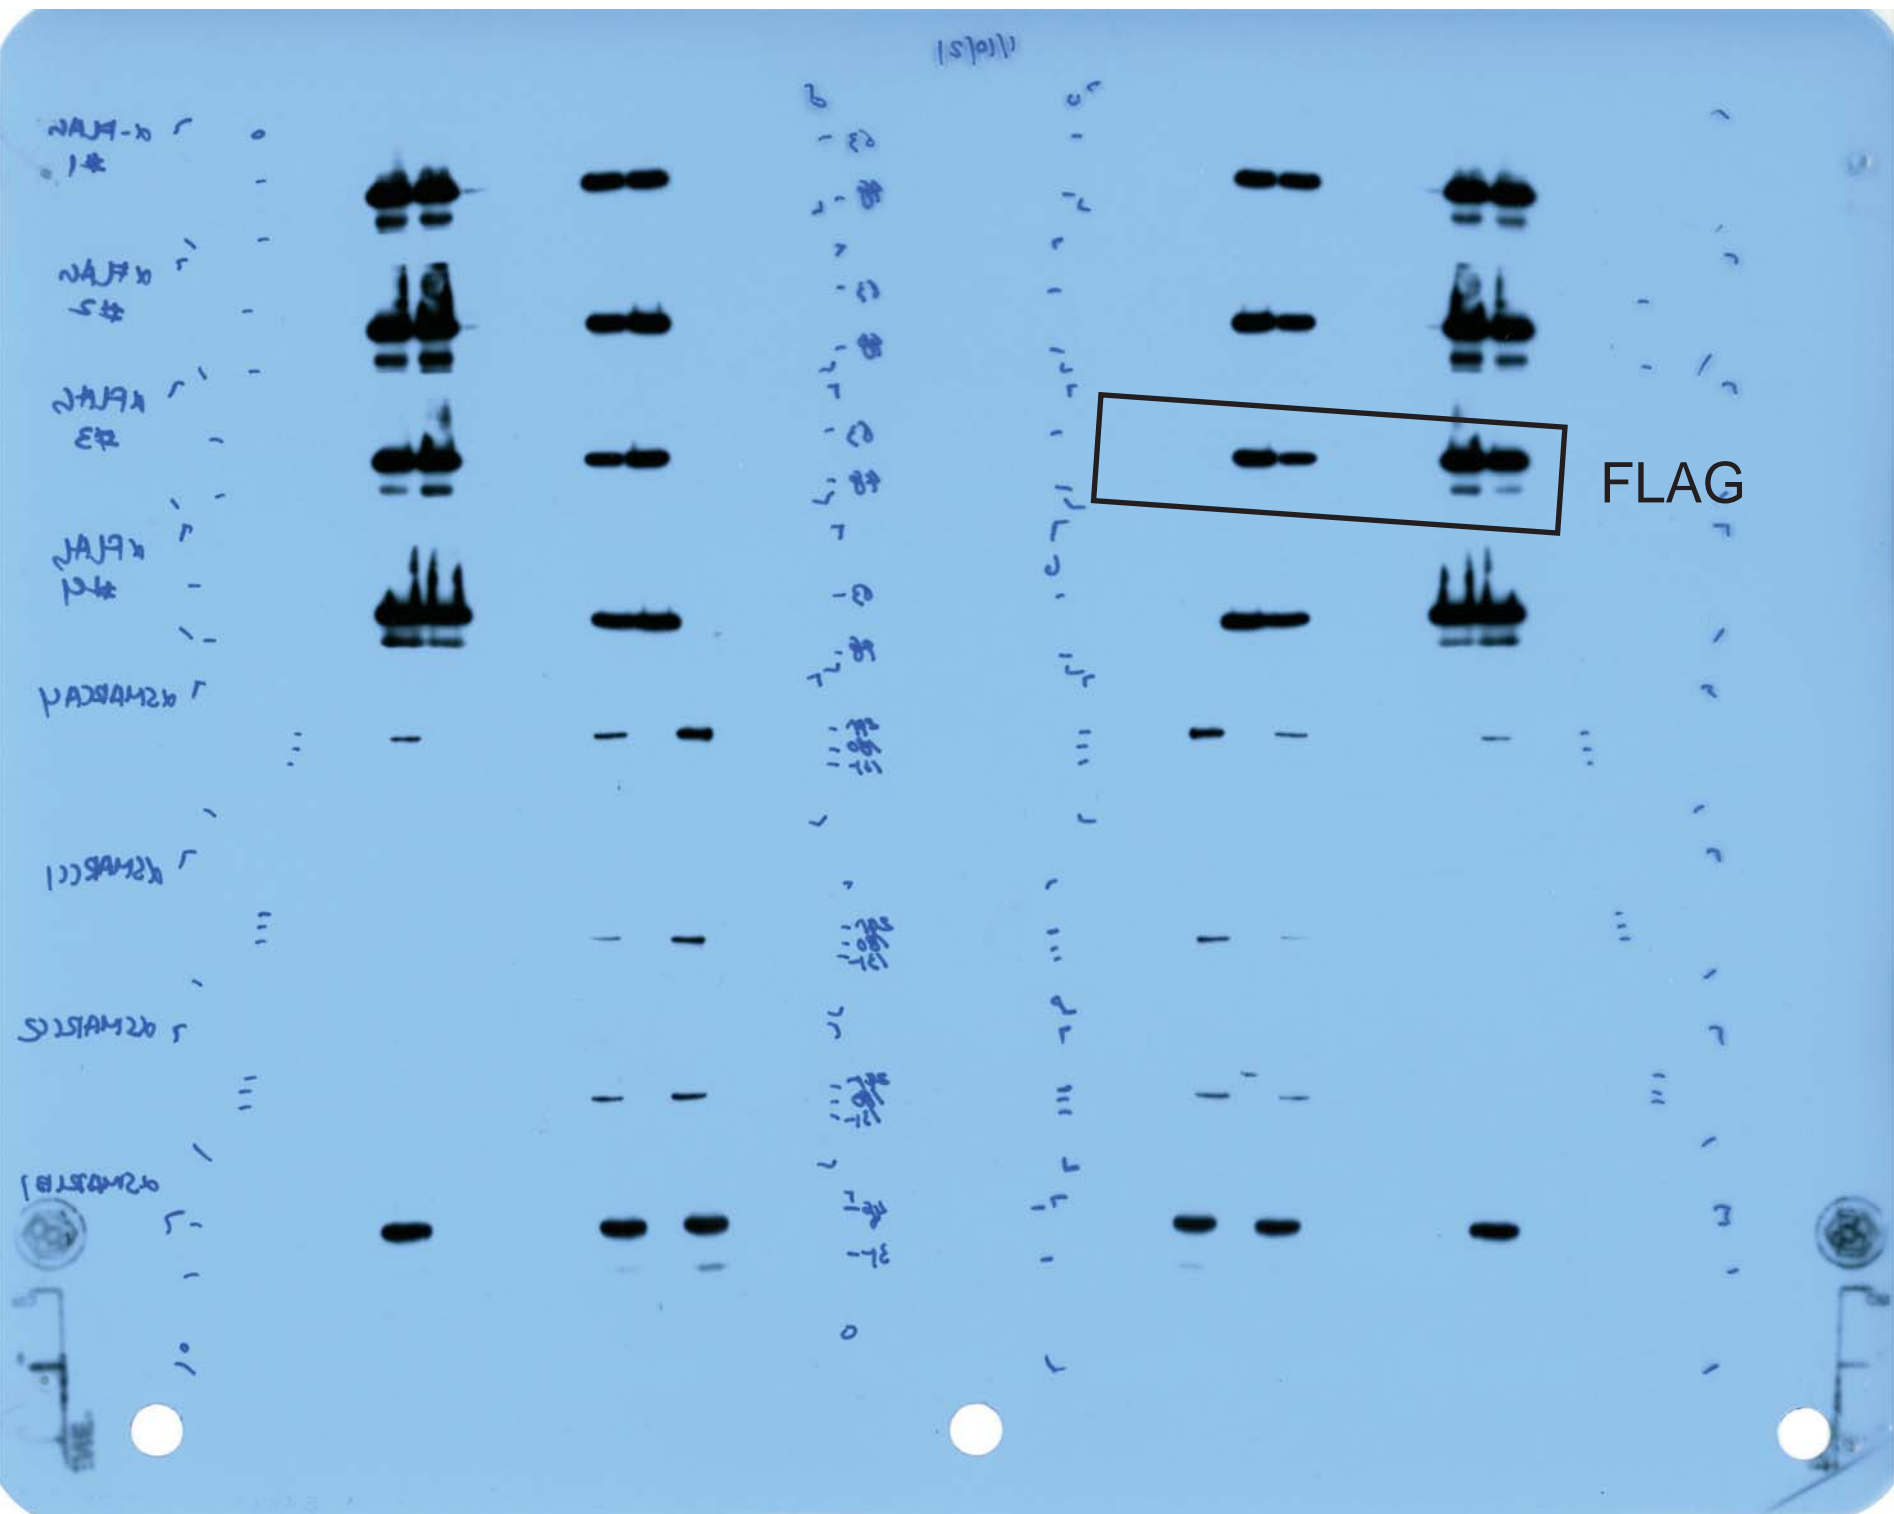

Supplement: fig2-data2 [file elife-73523-fig2-data2-v1.zip]

IP : IgG IPMK

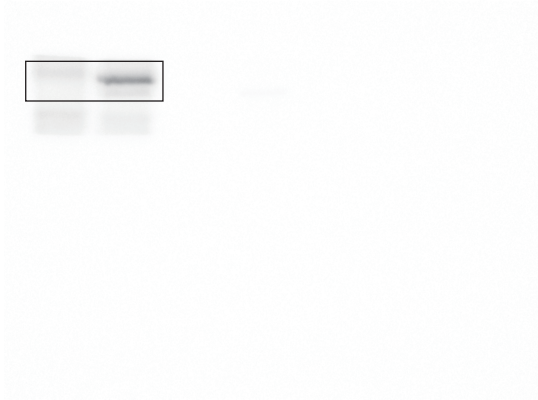

Input

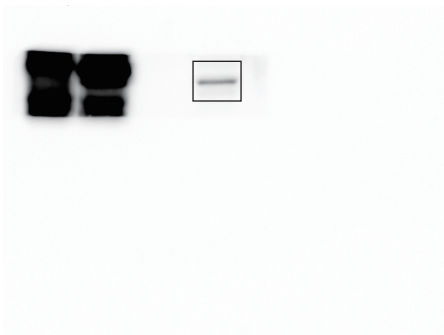

IPMK

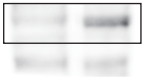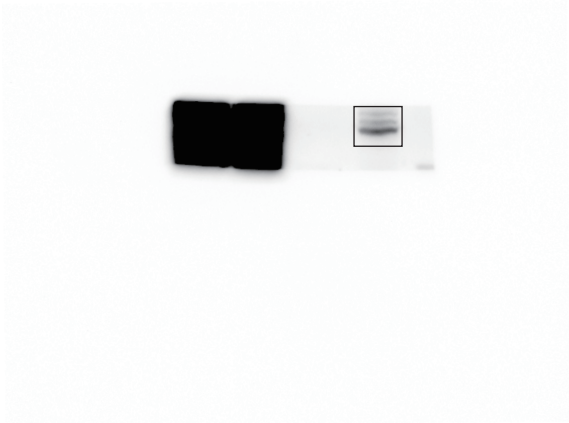

SMARCB1

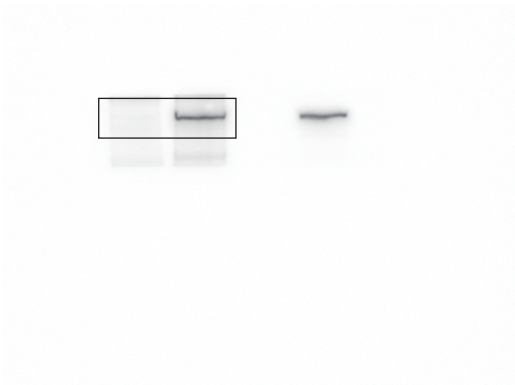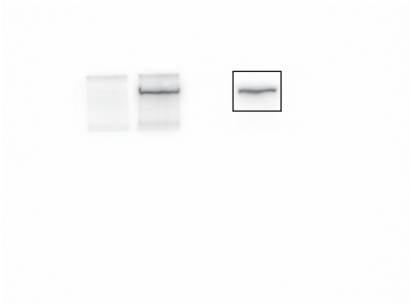

BRG1

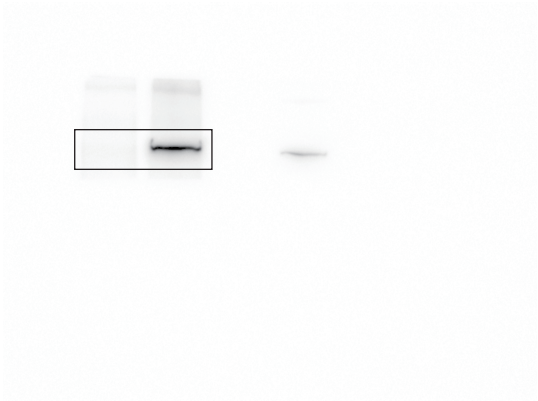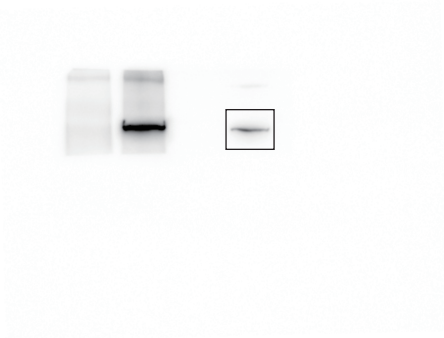

BAF155

Supplement: fig2-data3 [file elife-73523-fig2-data3-v1.zip]

D

IP : IgG SMARCB1

Input

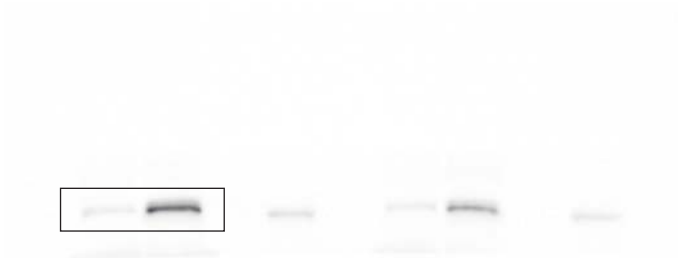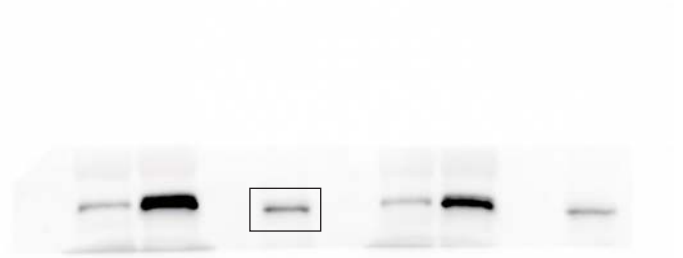

SMARCB1

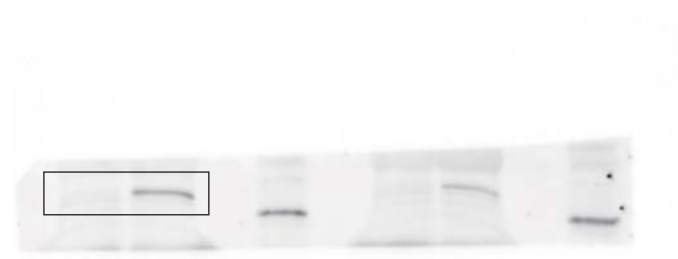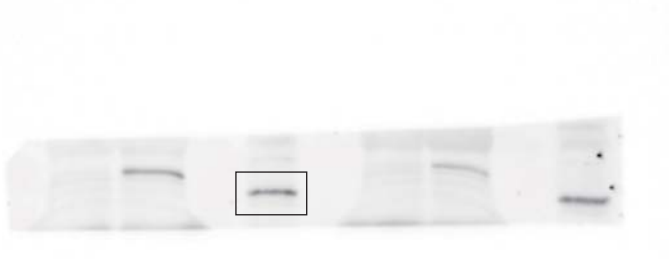

IPMK

Supplement: fig2-data4 [file elife-73523-fig2-data4-v1.zip]

**E**

IP : FLAG

FLAG

FLAG-IPMK

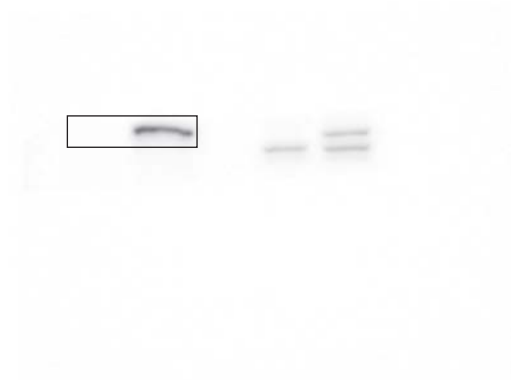

Input

FLAG

FLAG-IPMK

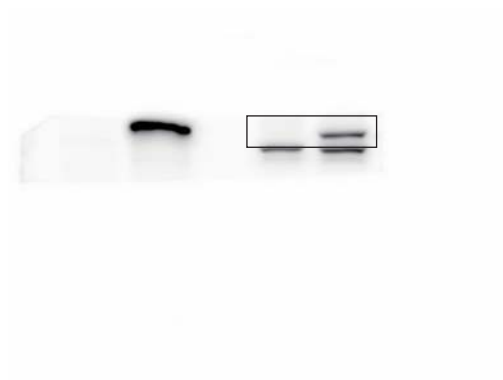

IPMK

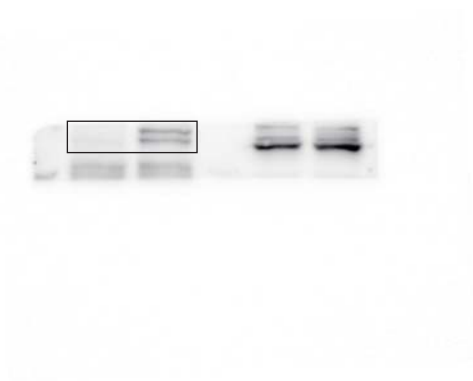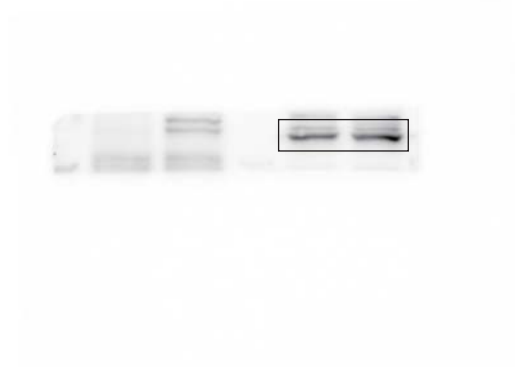

SMARCB1

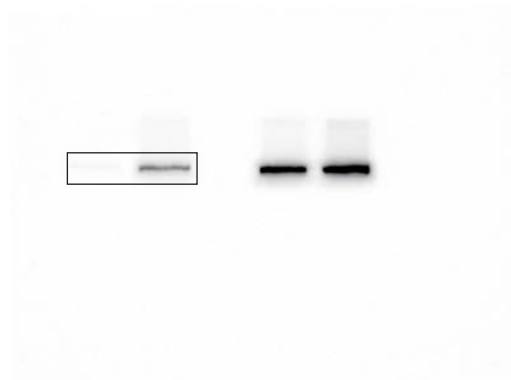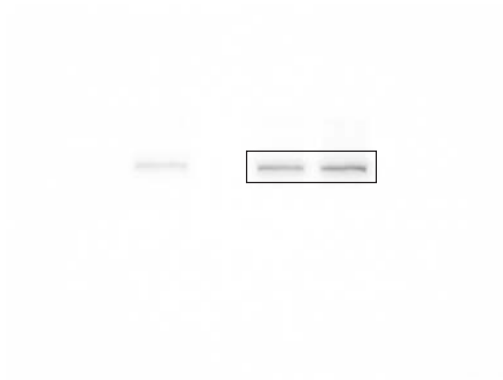

BRG1

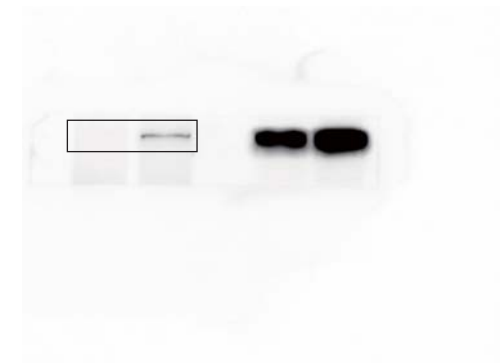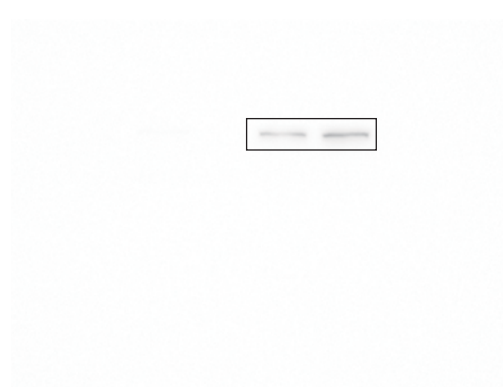

BAF155

Supplement: fig2-data5 [file elife-73523-fig2-data5-v1.zip]

**F**

IP :    IgG    IPMK    IgG    IPMK  
         Control   Control   *Ipmk*KD   *Ipmk*KD

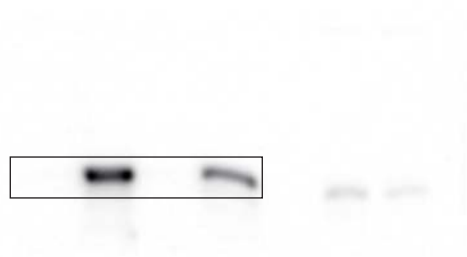

Input  
Control *Ipmk*KD

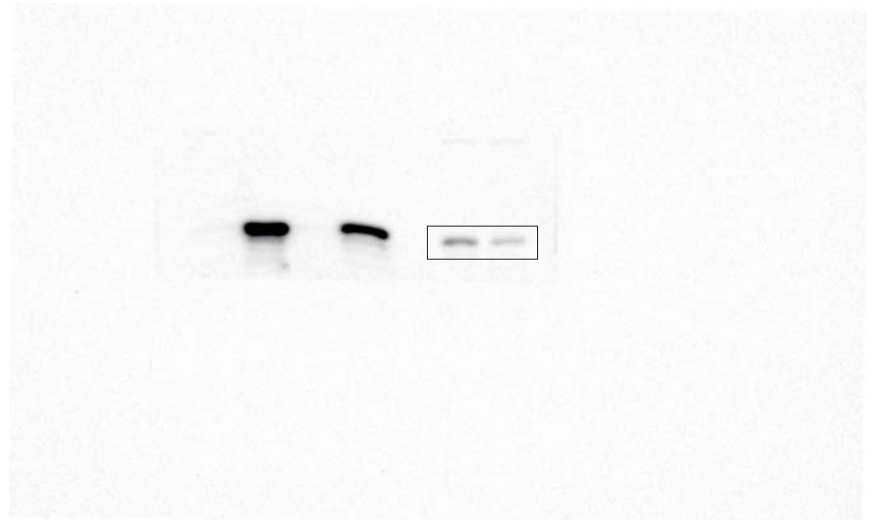

IPMK

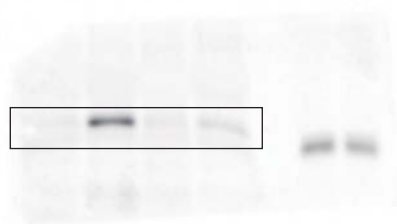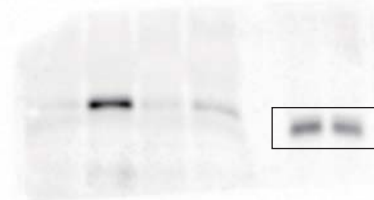

SMARCB1

Supplement: fig2-data6 [file elife-73523-fig2-data6-v1.zip]

**A**

IP  
IgG IPMK

Input

IPMK

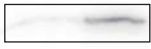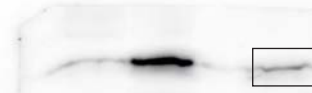

SMARCB1

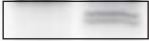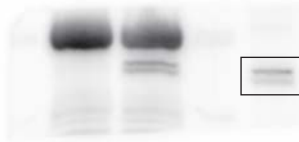

BRG1

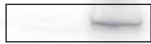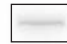

Supplement: fig2-figsupp1-data1 [file elife-73523-fig2-figsupp1-data1-v1.zip]

**B**

|  | IP  |      |
|--|-----|------|
|  | IgG | IPMK |

Input

IPMK

SMARCB1

BAF170

BRG1

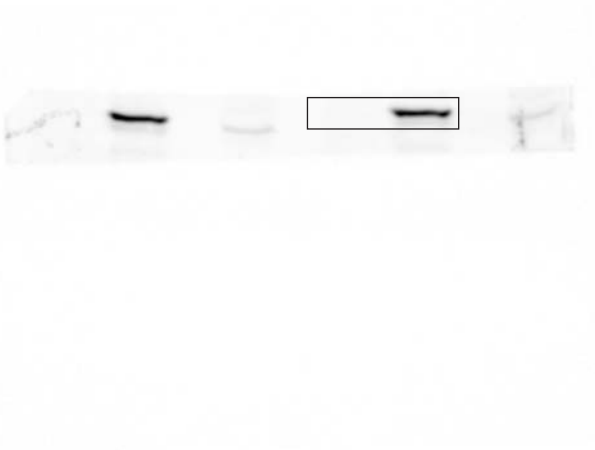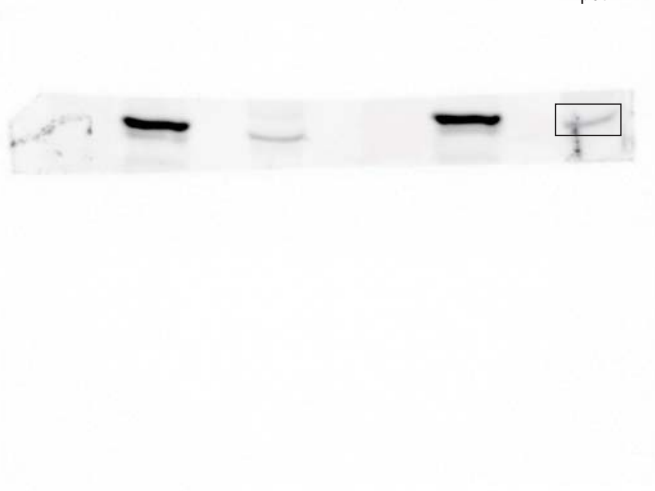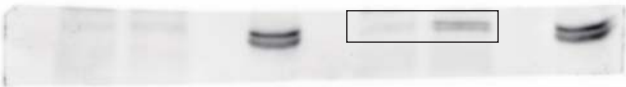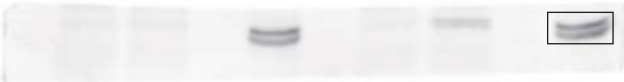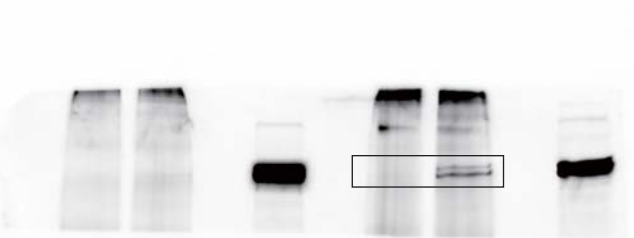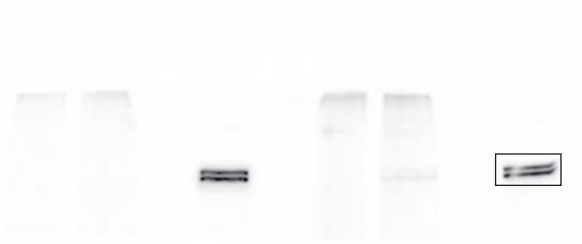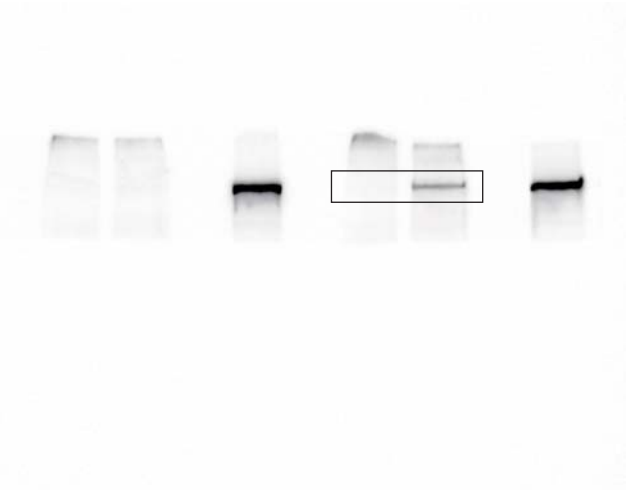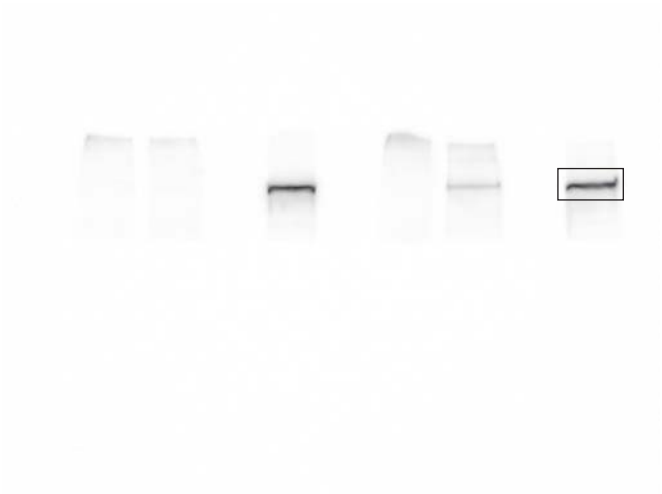

Supplement: fig2-figsupp1-data2 [file elife-73523-fig2-figsupp1-data2-v1.zip]

**C**

IP : IgG SMARCB1  
WT WT KO KO

Input  
WT KO

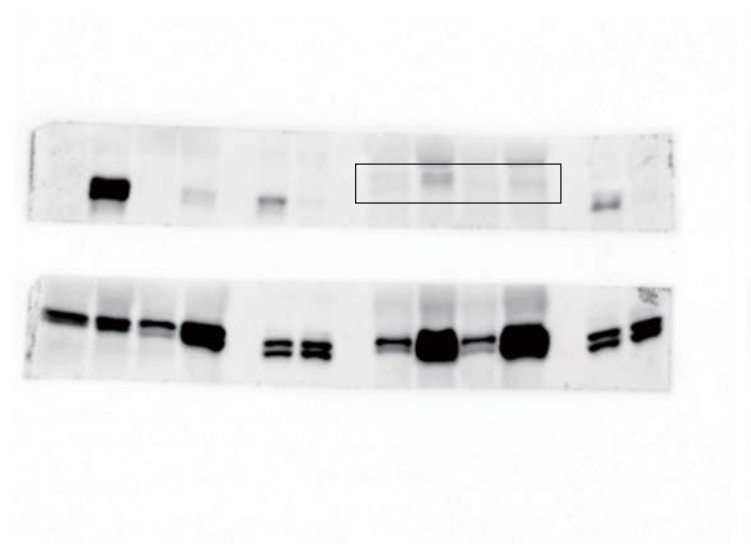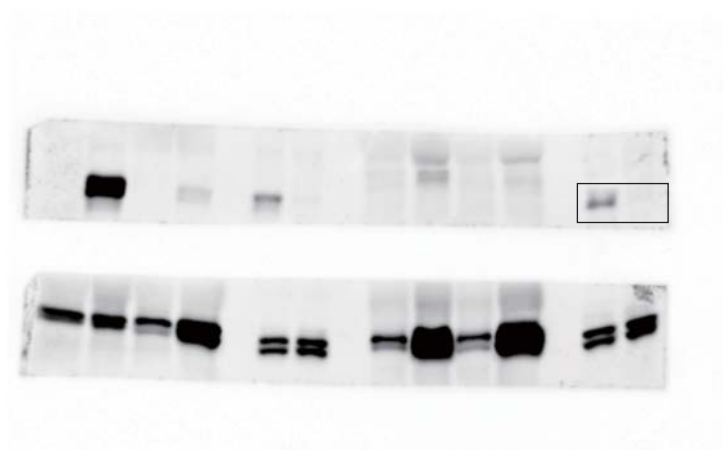

IPMK

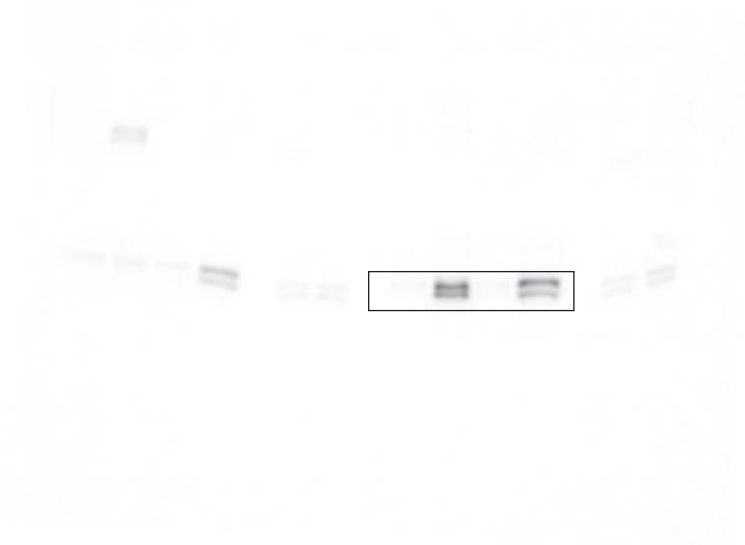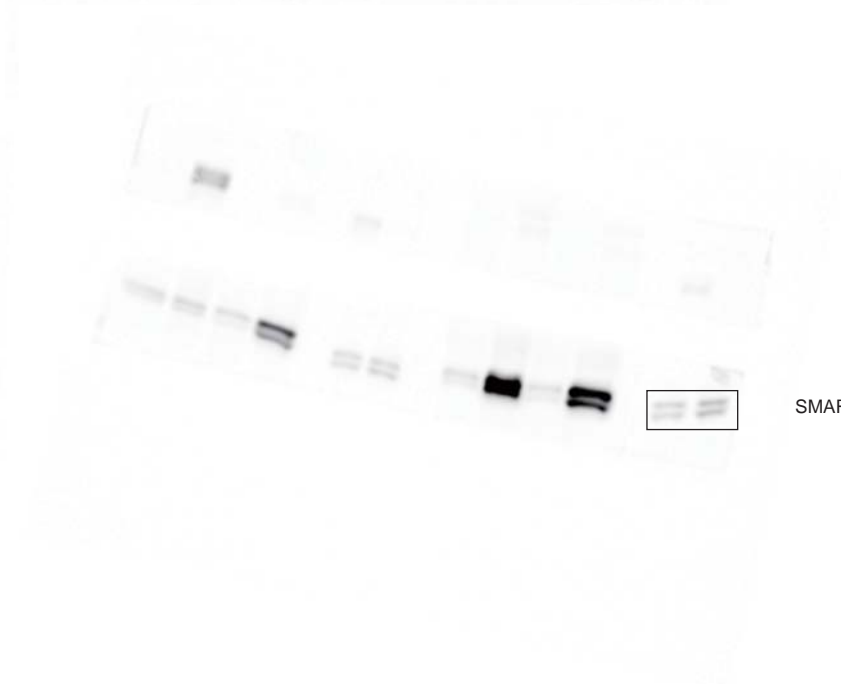

SMARCB1

Supplement: fig2-figsupp1-data3 [file elife-73523-fig2-figsupp1-data3-v1.zip]

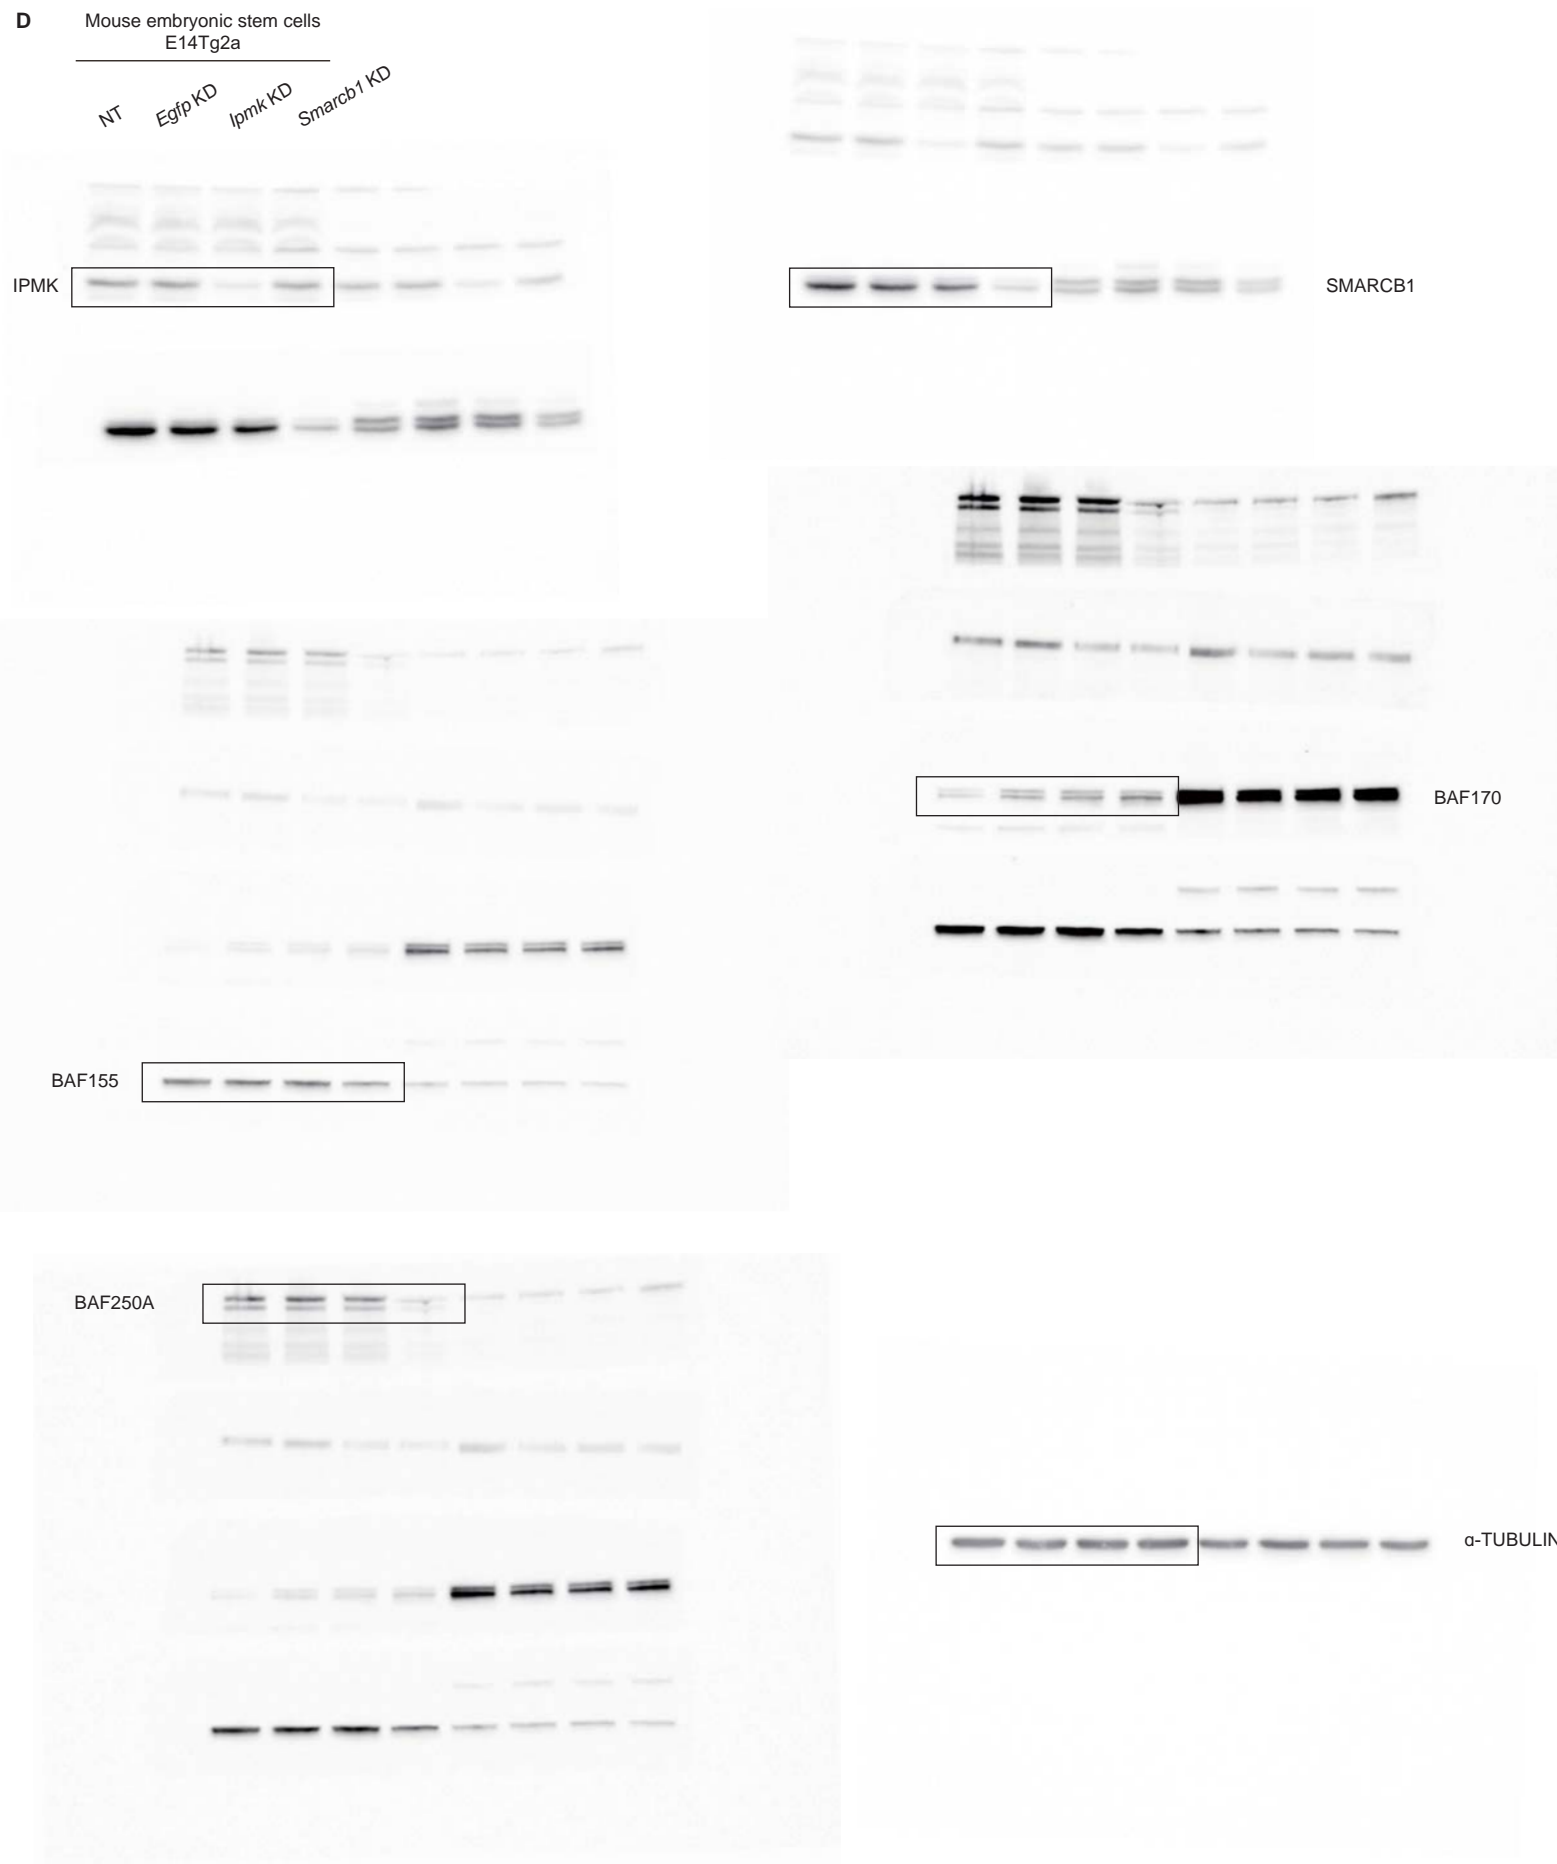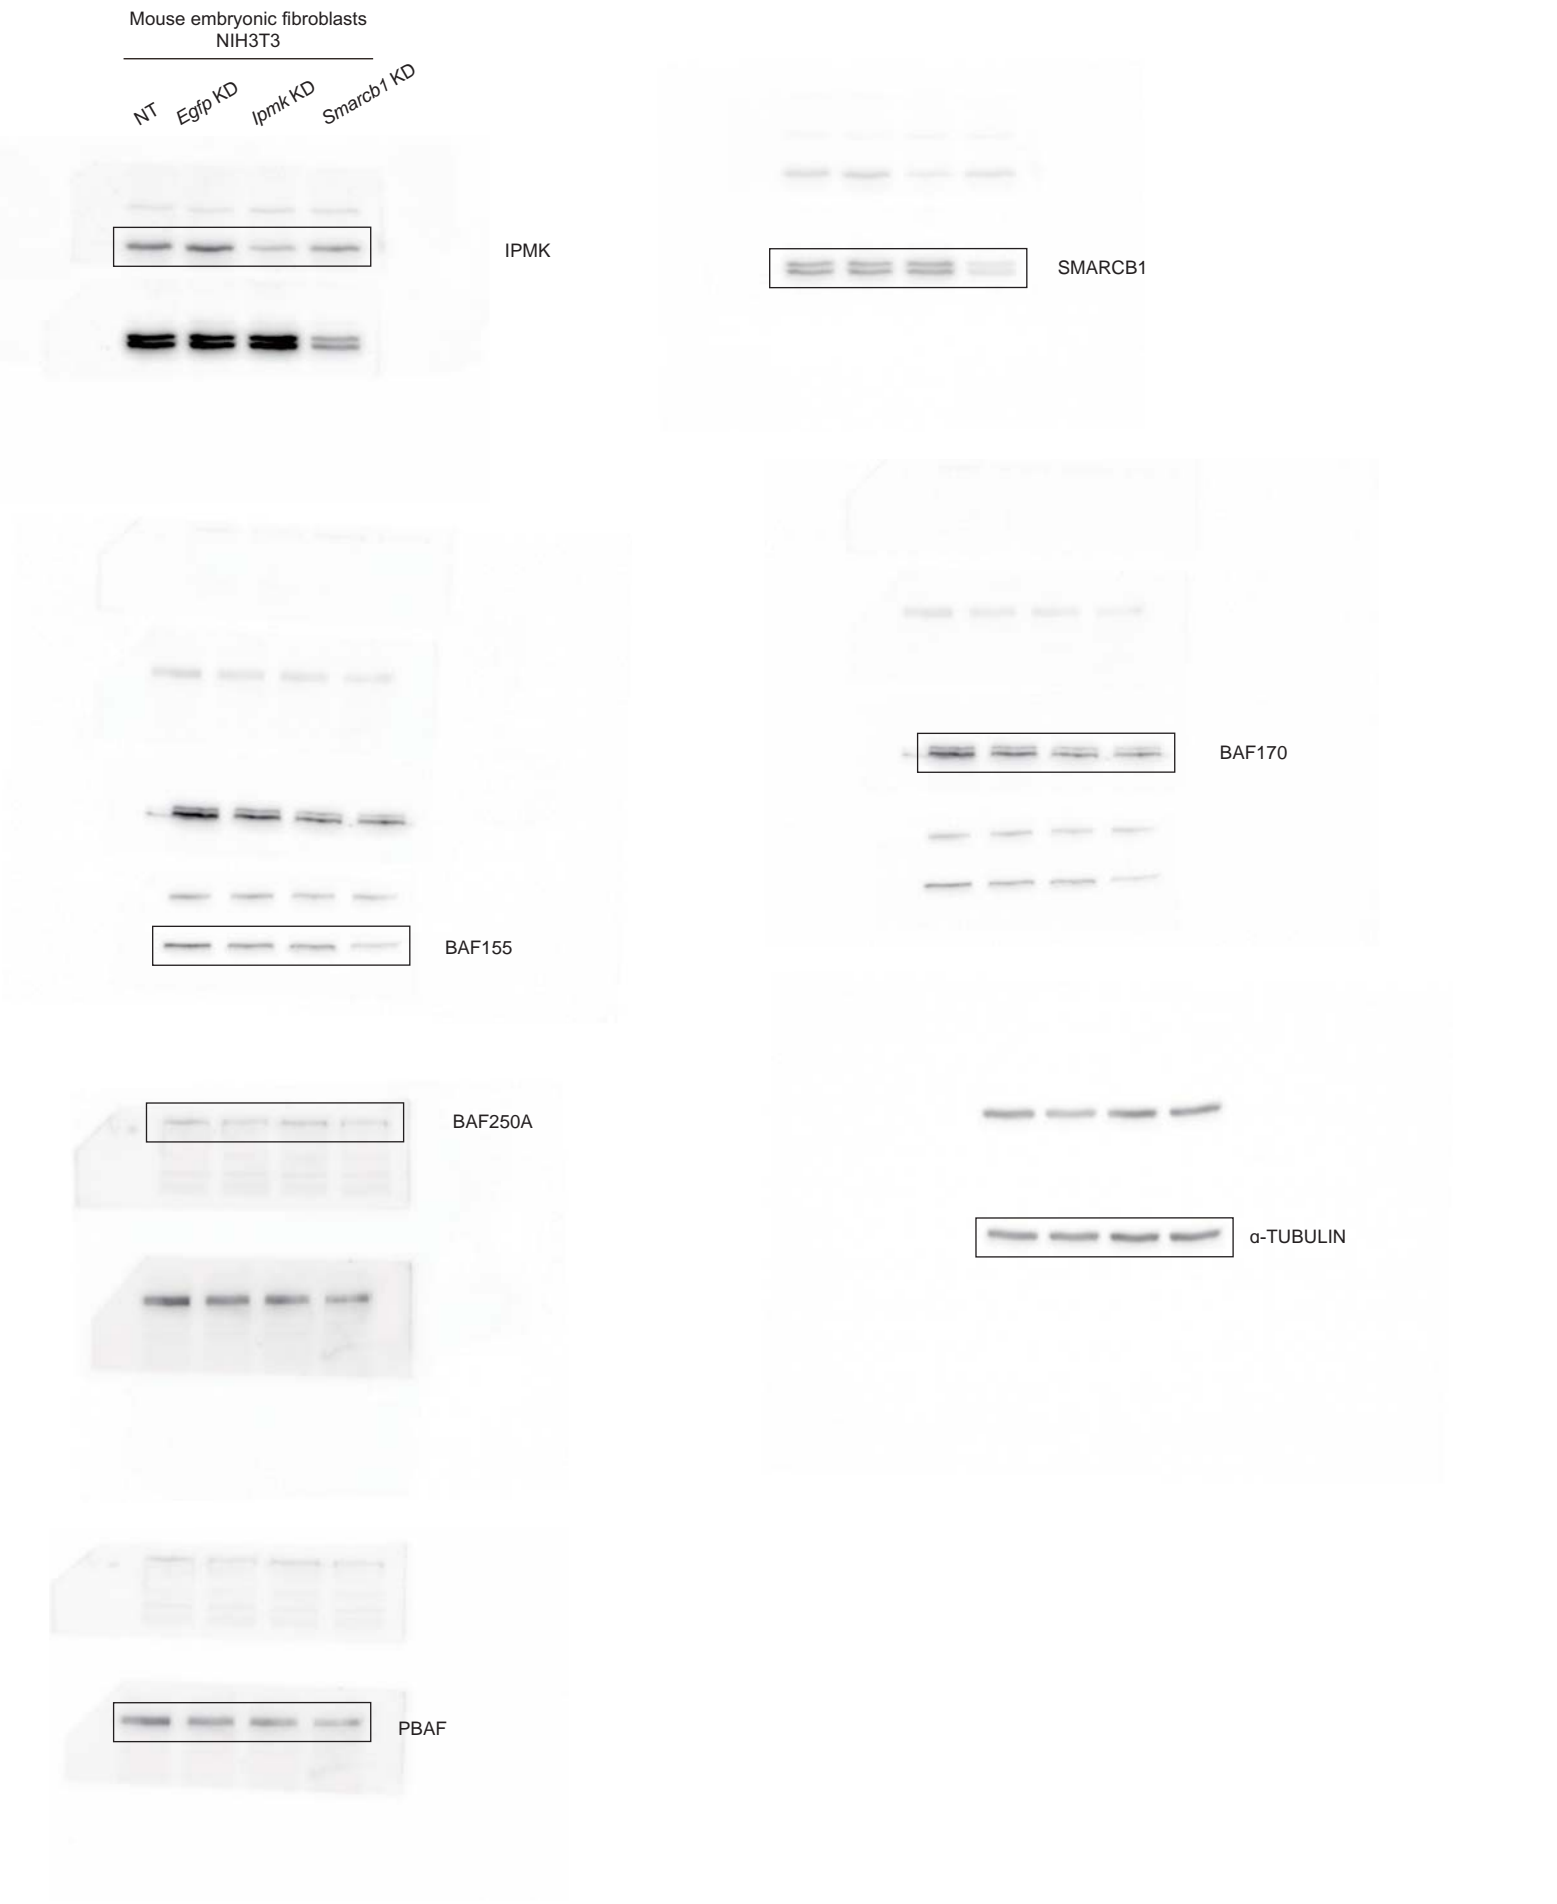

Supplement: fig2-figsupp1-data4 [file elife-73523-fig2-figsupp1-data4-v1.zip]

E

IP : IgG    IP : IPMK

Egfp KD    Smarcb1 KD    Egfp KD

IPMK

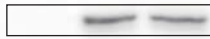

SMARCB1

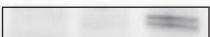

BRG1

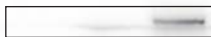

Input

Smarcb1 KD    Egfp KD

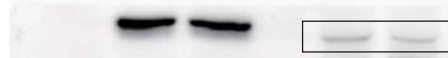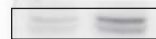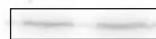

Supplement: fig2-figsupp1-data5 [file elife-73523-fig2-figsupp1-data5-v1.zip]

**F**

|                |   |   |
|----------------|---|---|
| FLAG :         | + | - |
| FLAG-SMARCB1 : | - | + |
| GST-IPMK :     | + | + |

IP :  
FLAG

GST

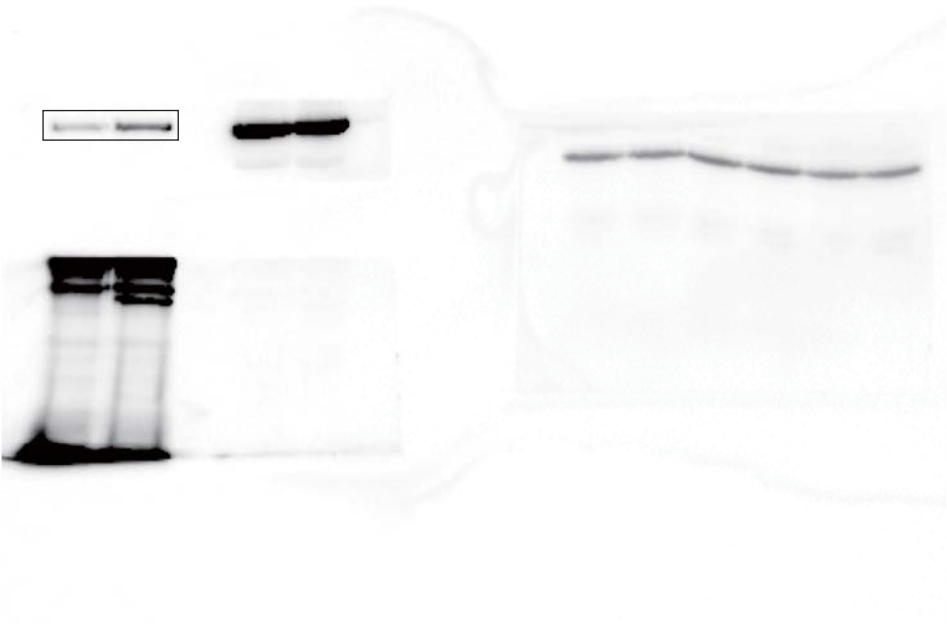

IP :  
FLAG

FLAG

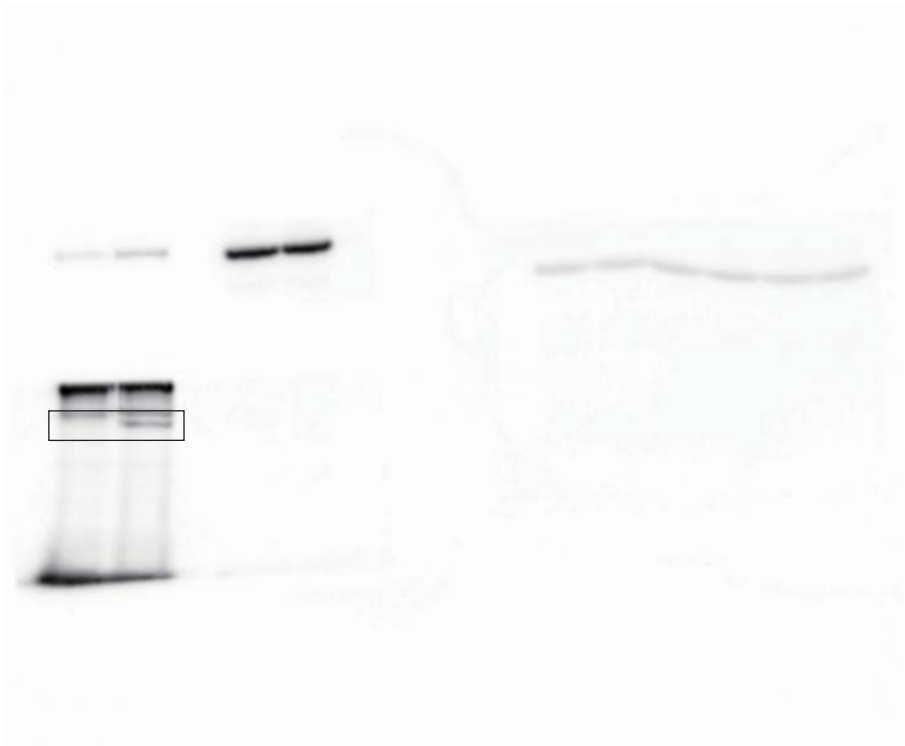

Input

GST

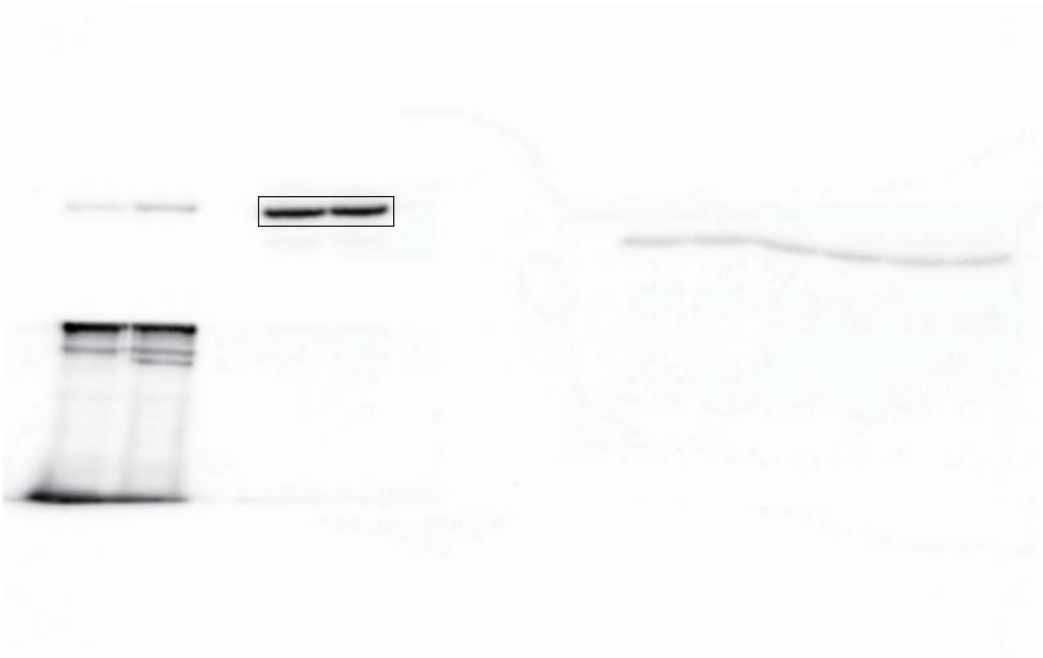

Input

FLAG

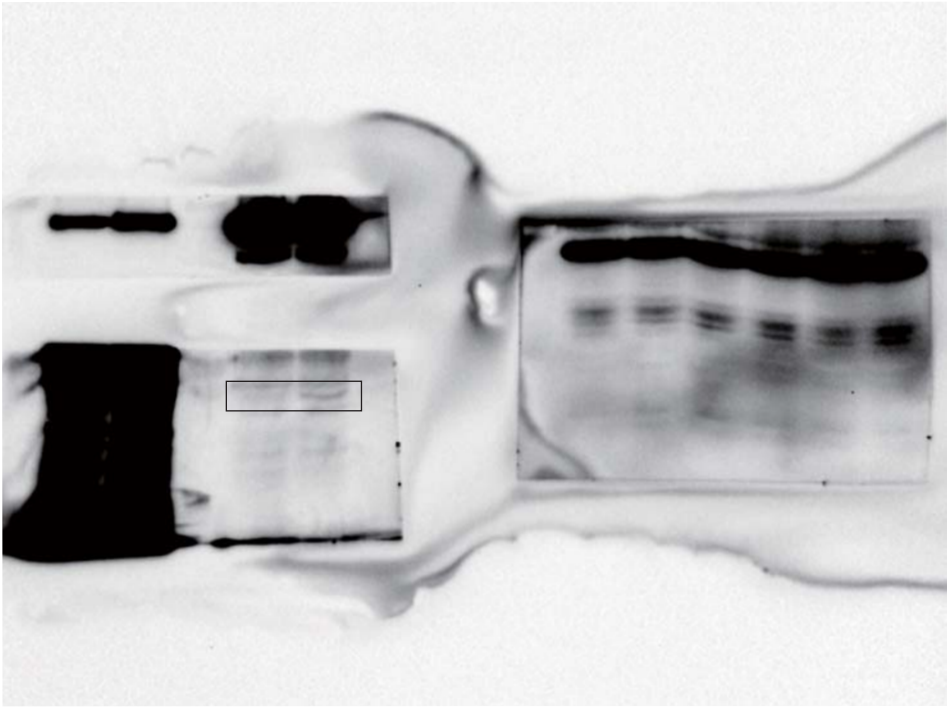

Supplement: fig2-figsupp1-data6 [file elife-73523-fig2-figsupp1-data6-v1.zip]

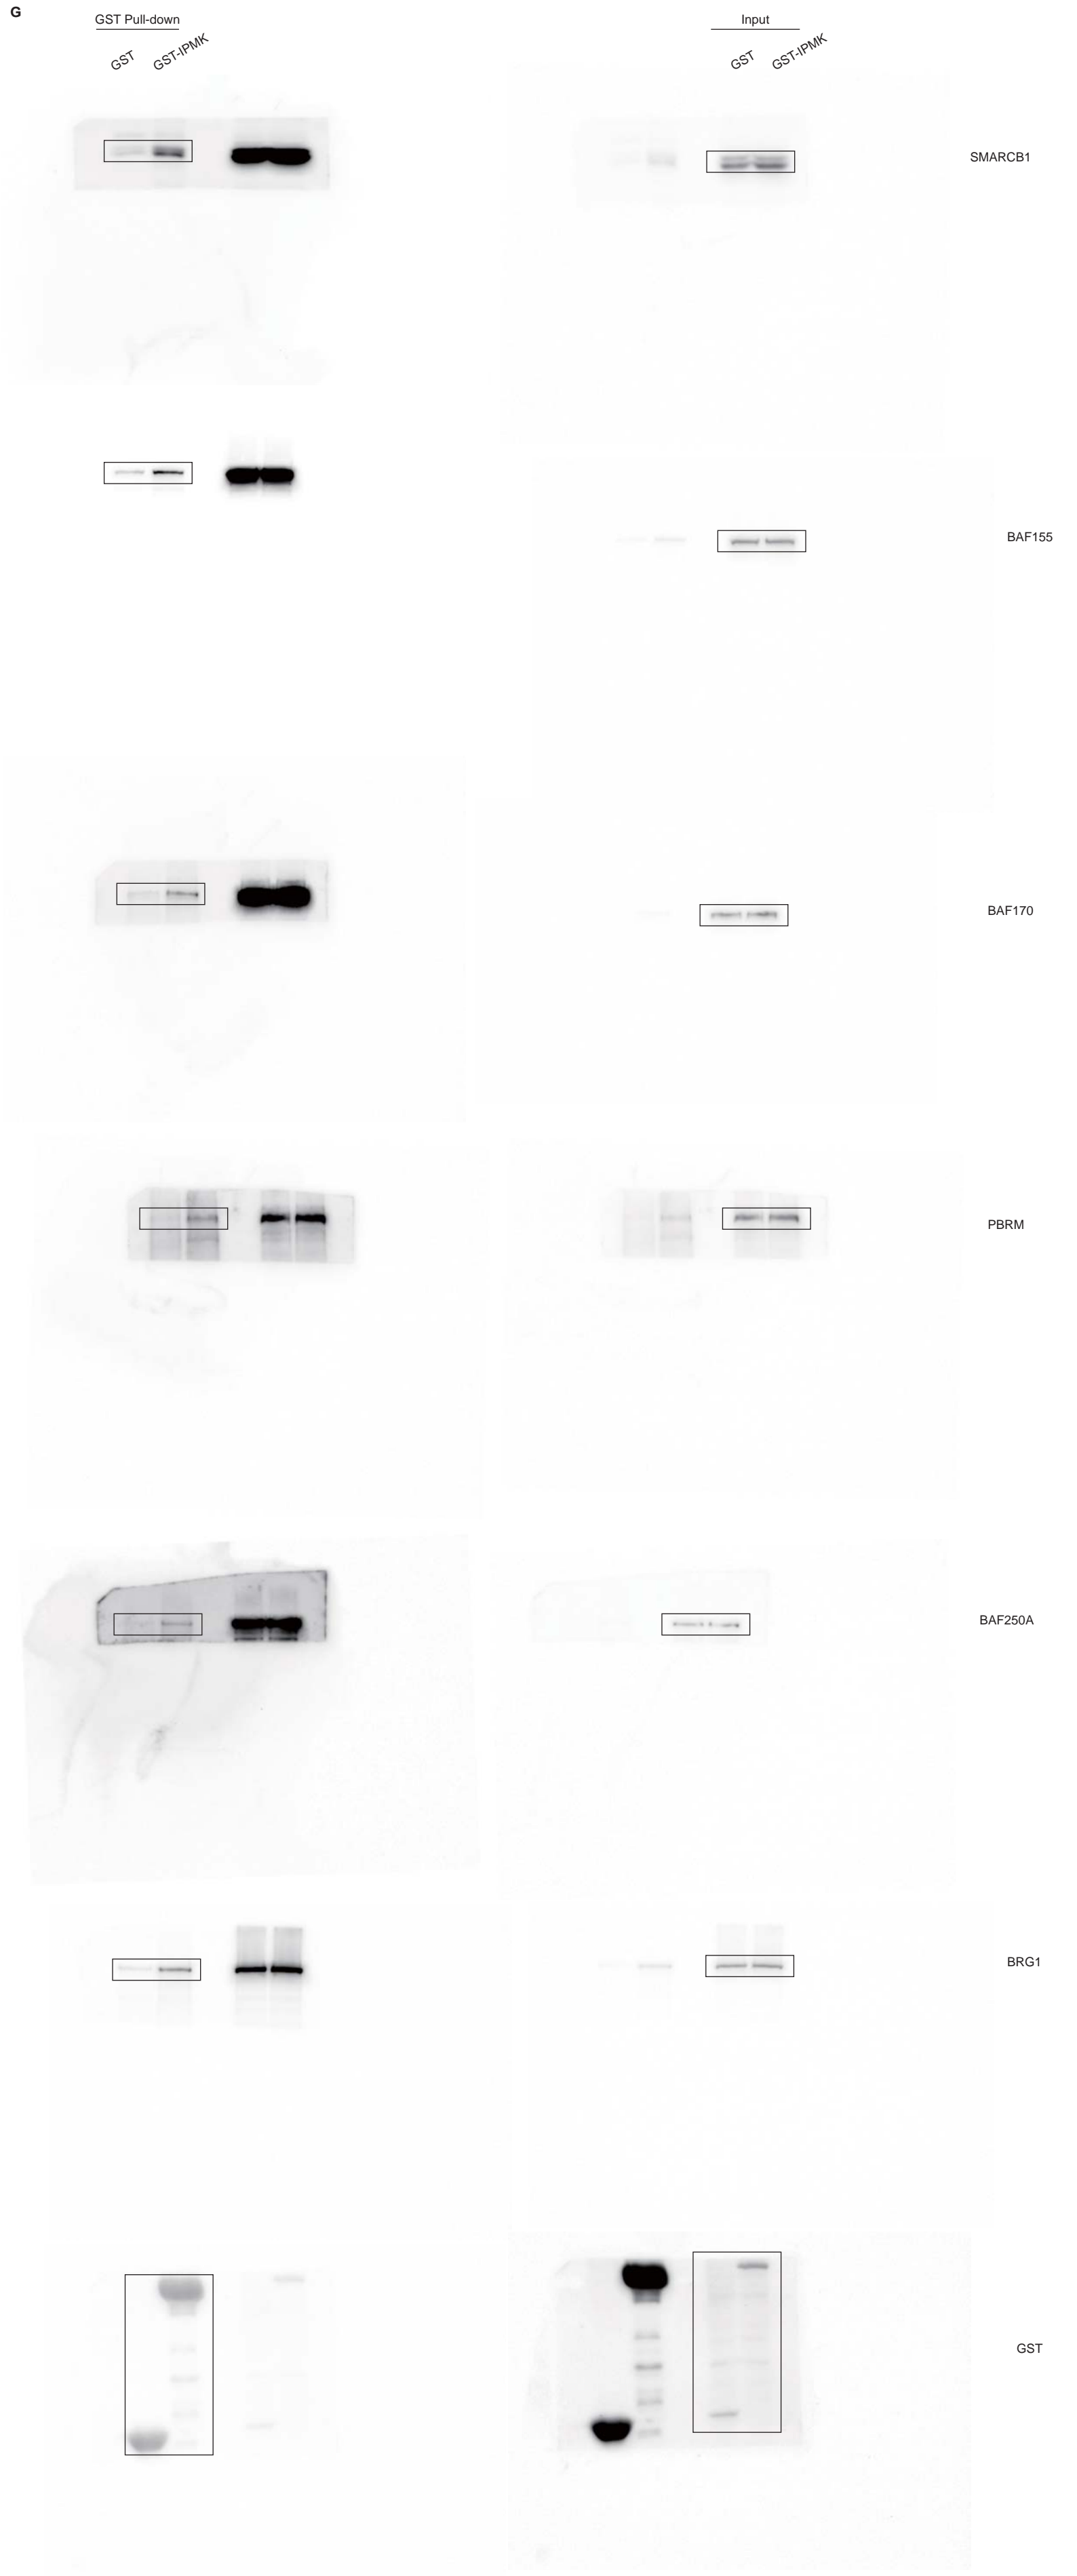

Supplement: fig2-figsupp1-data7 [file elife-73523-fig2-figsupp1-data7-v1.zip]

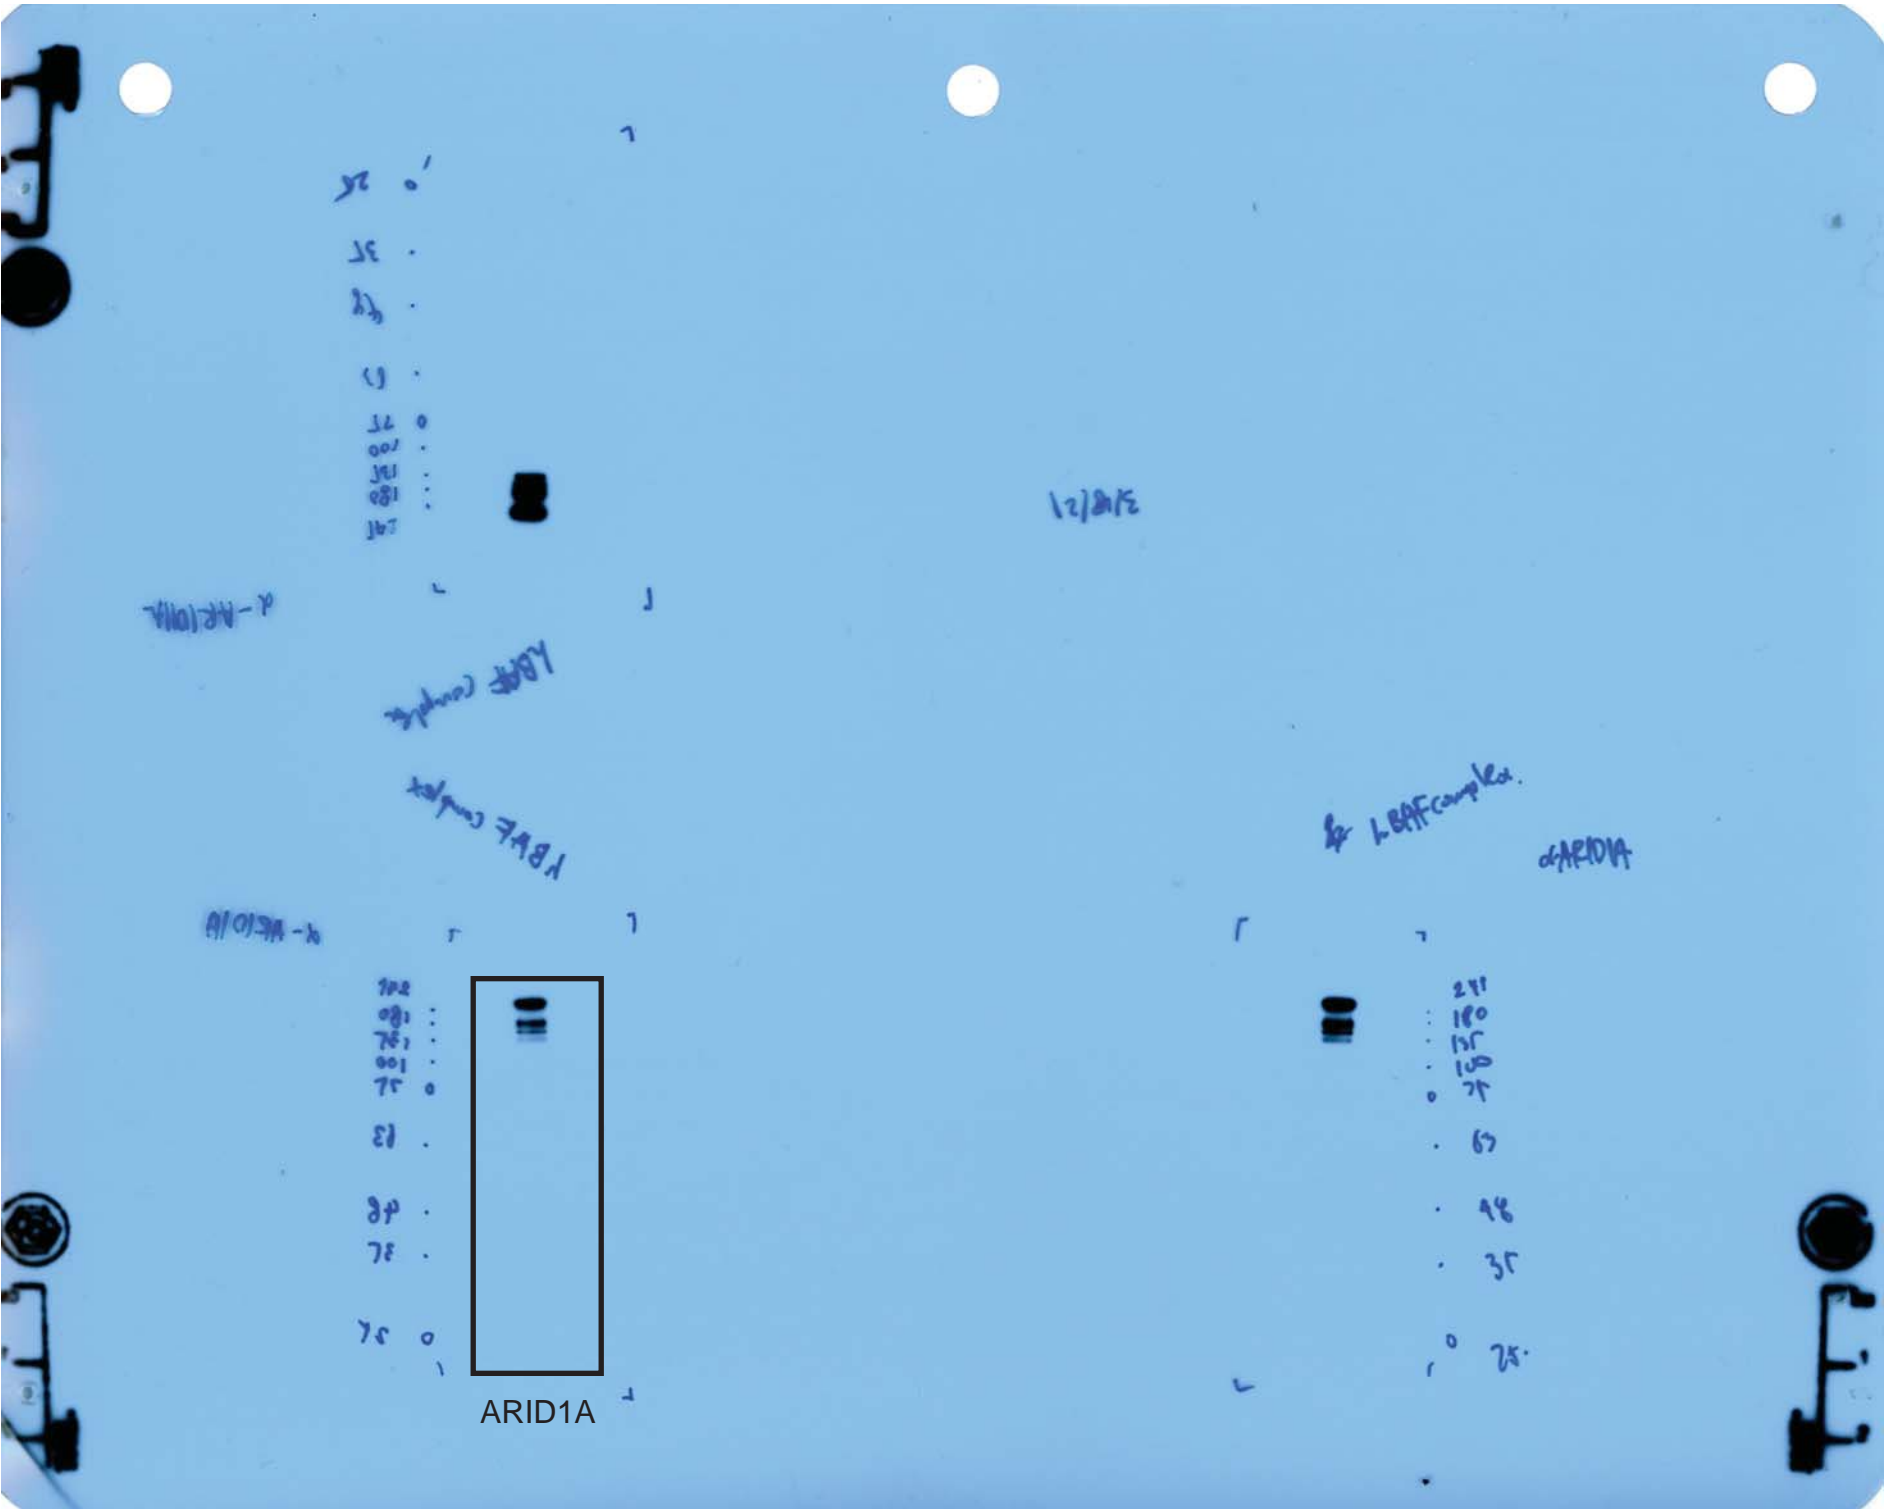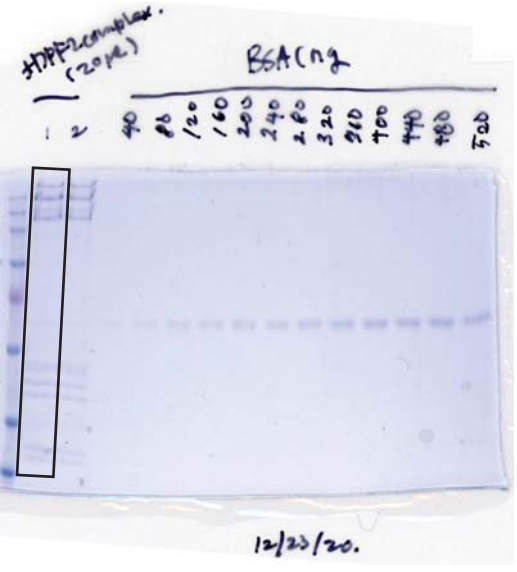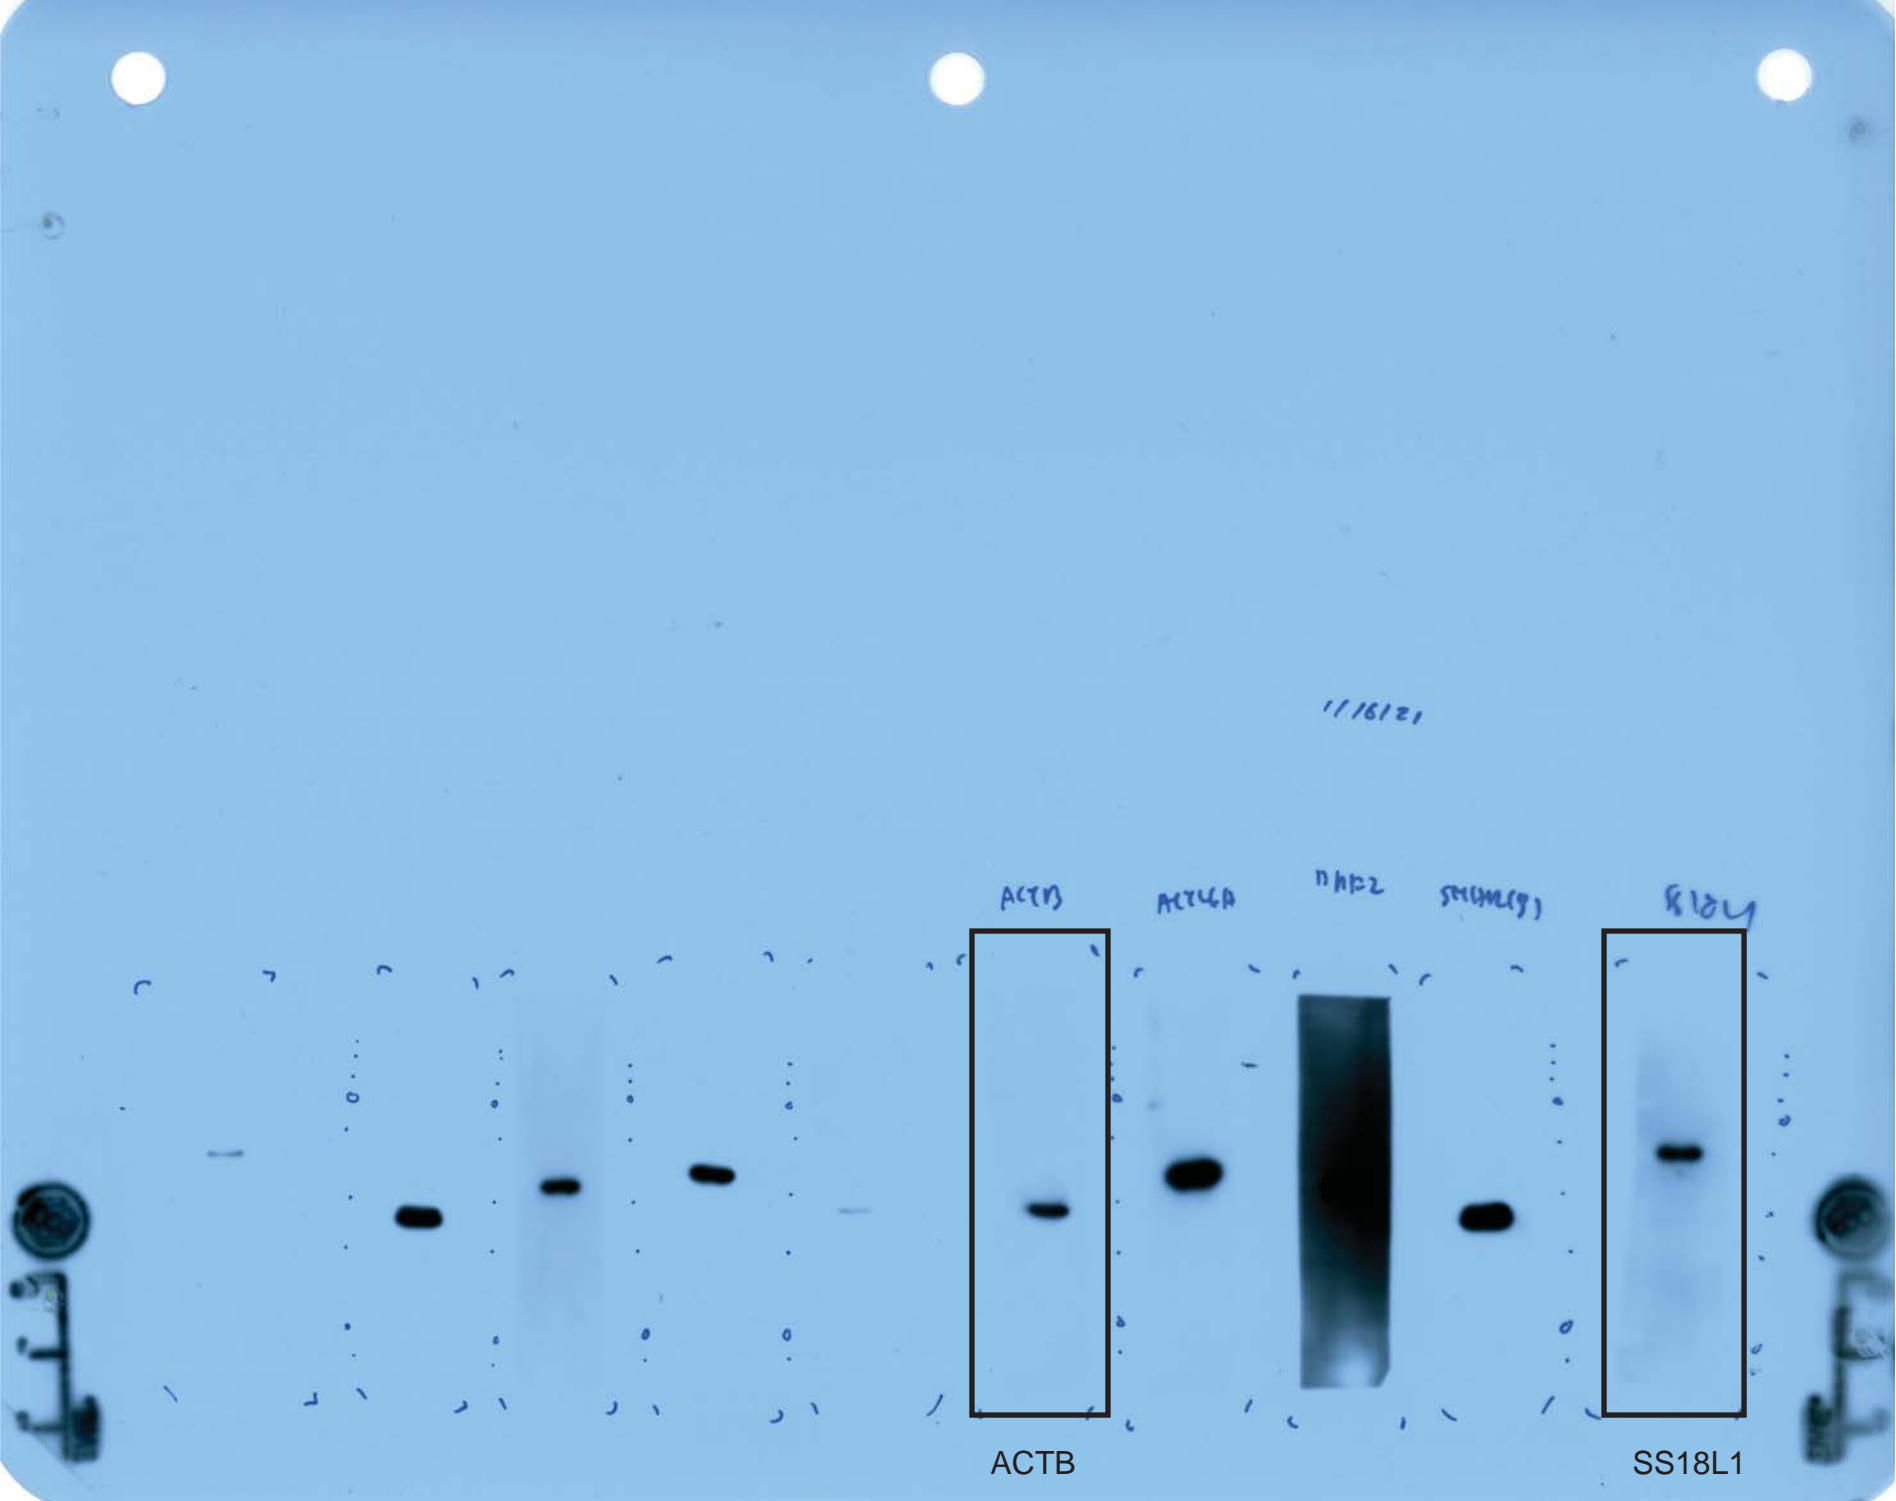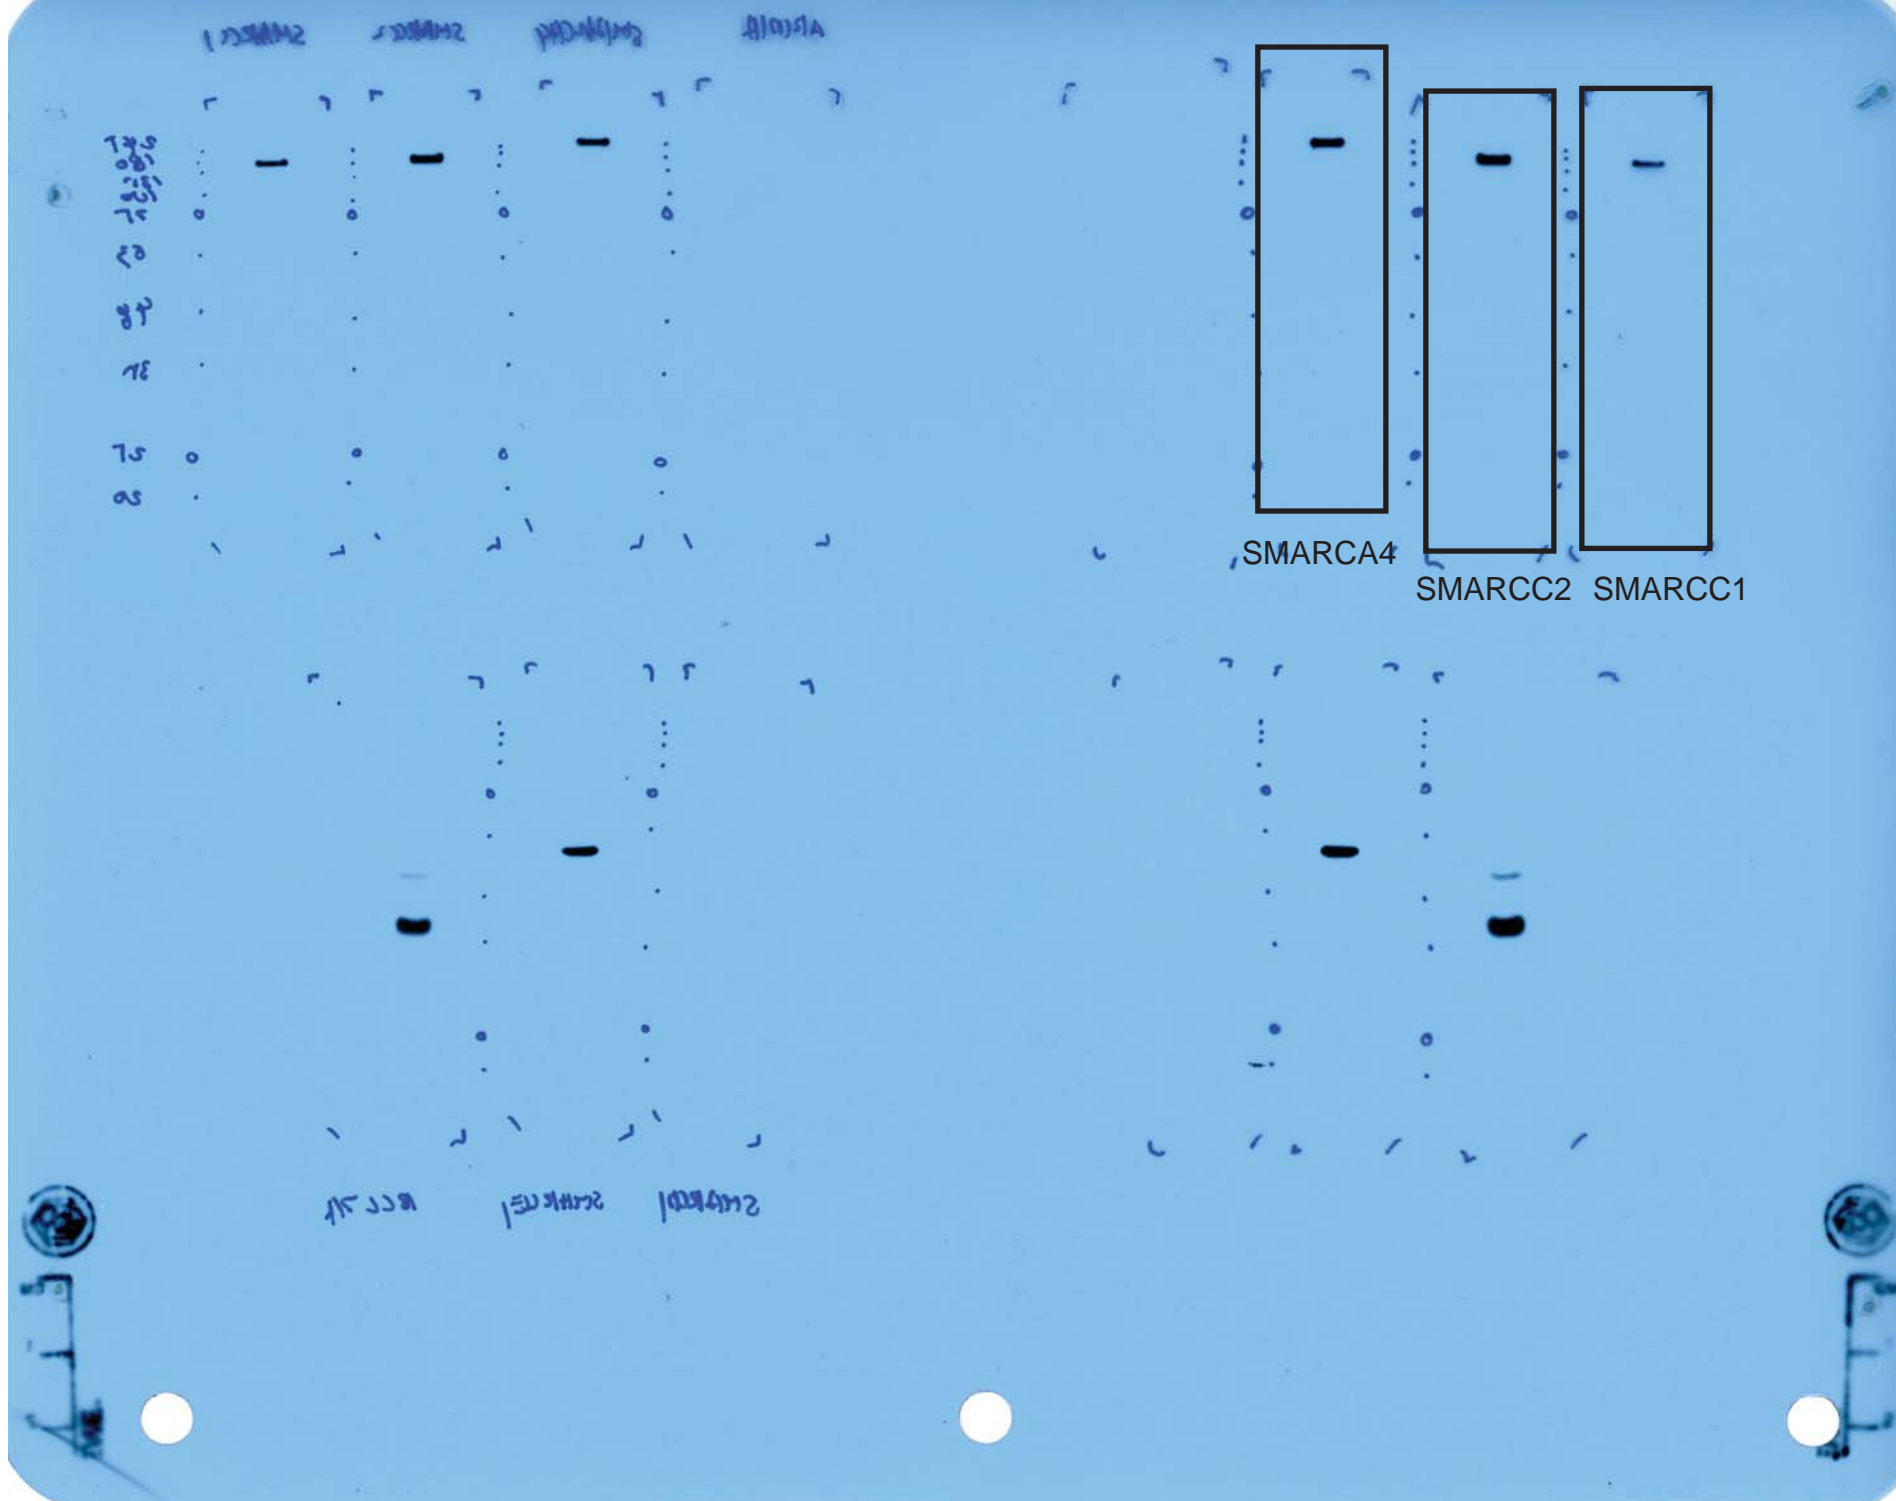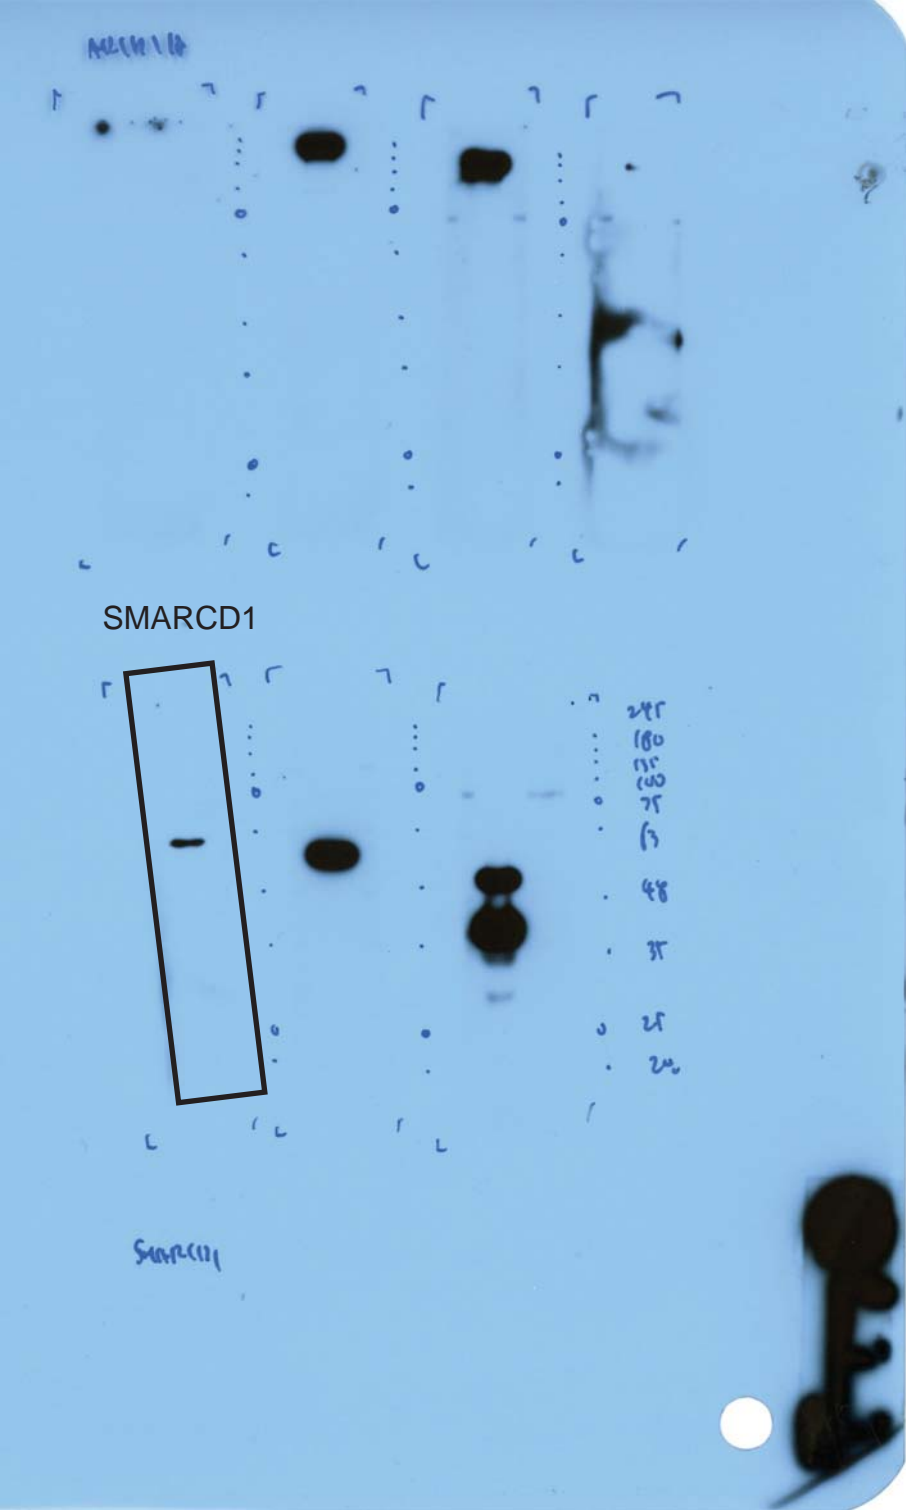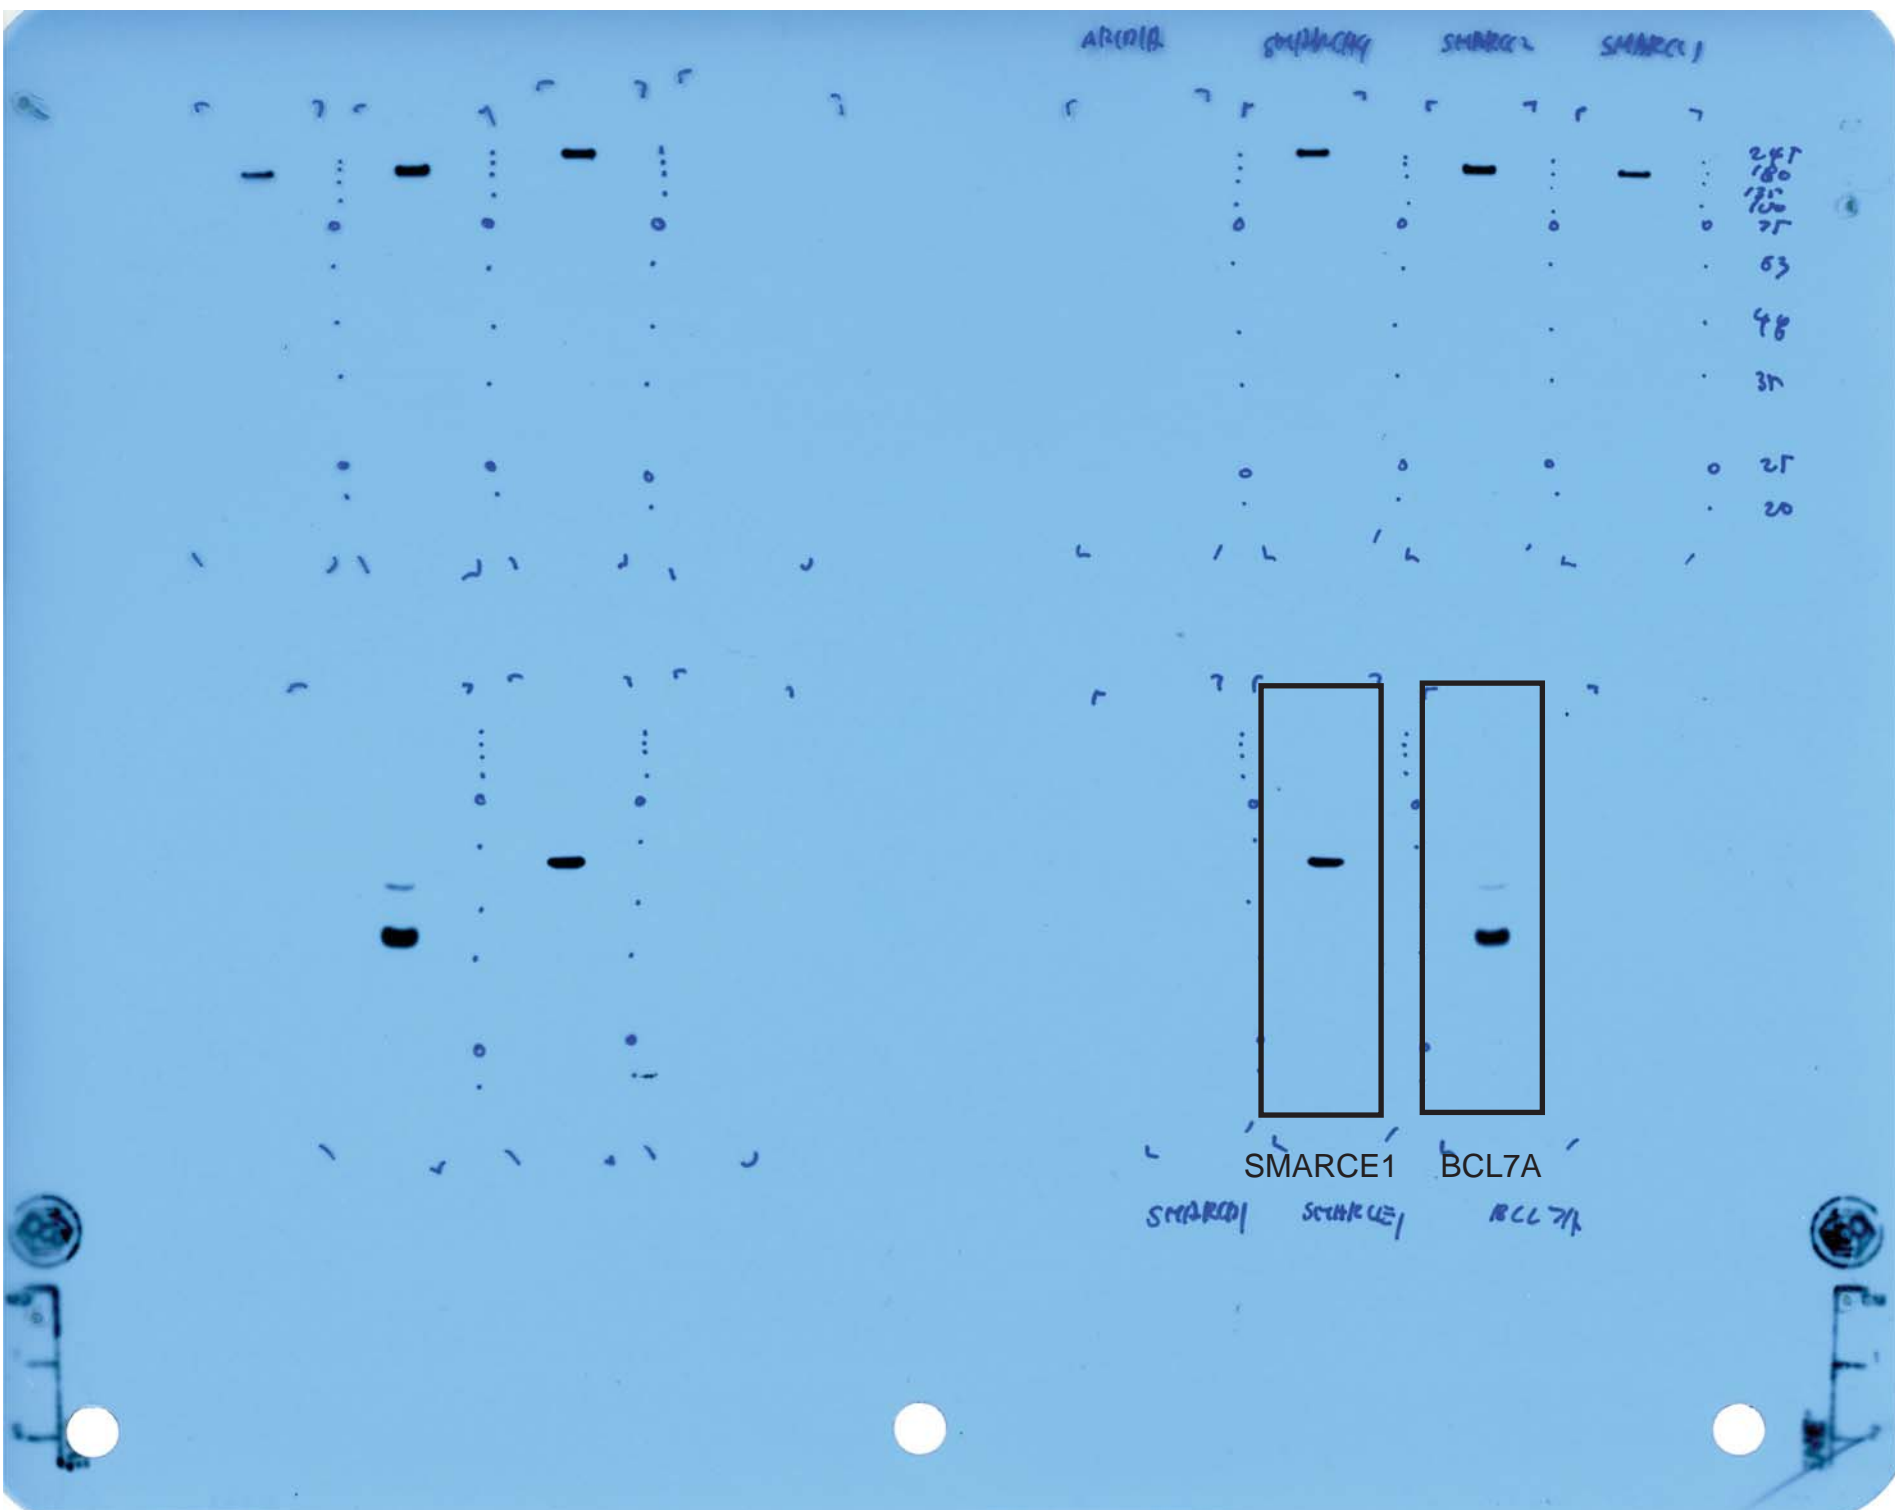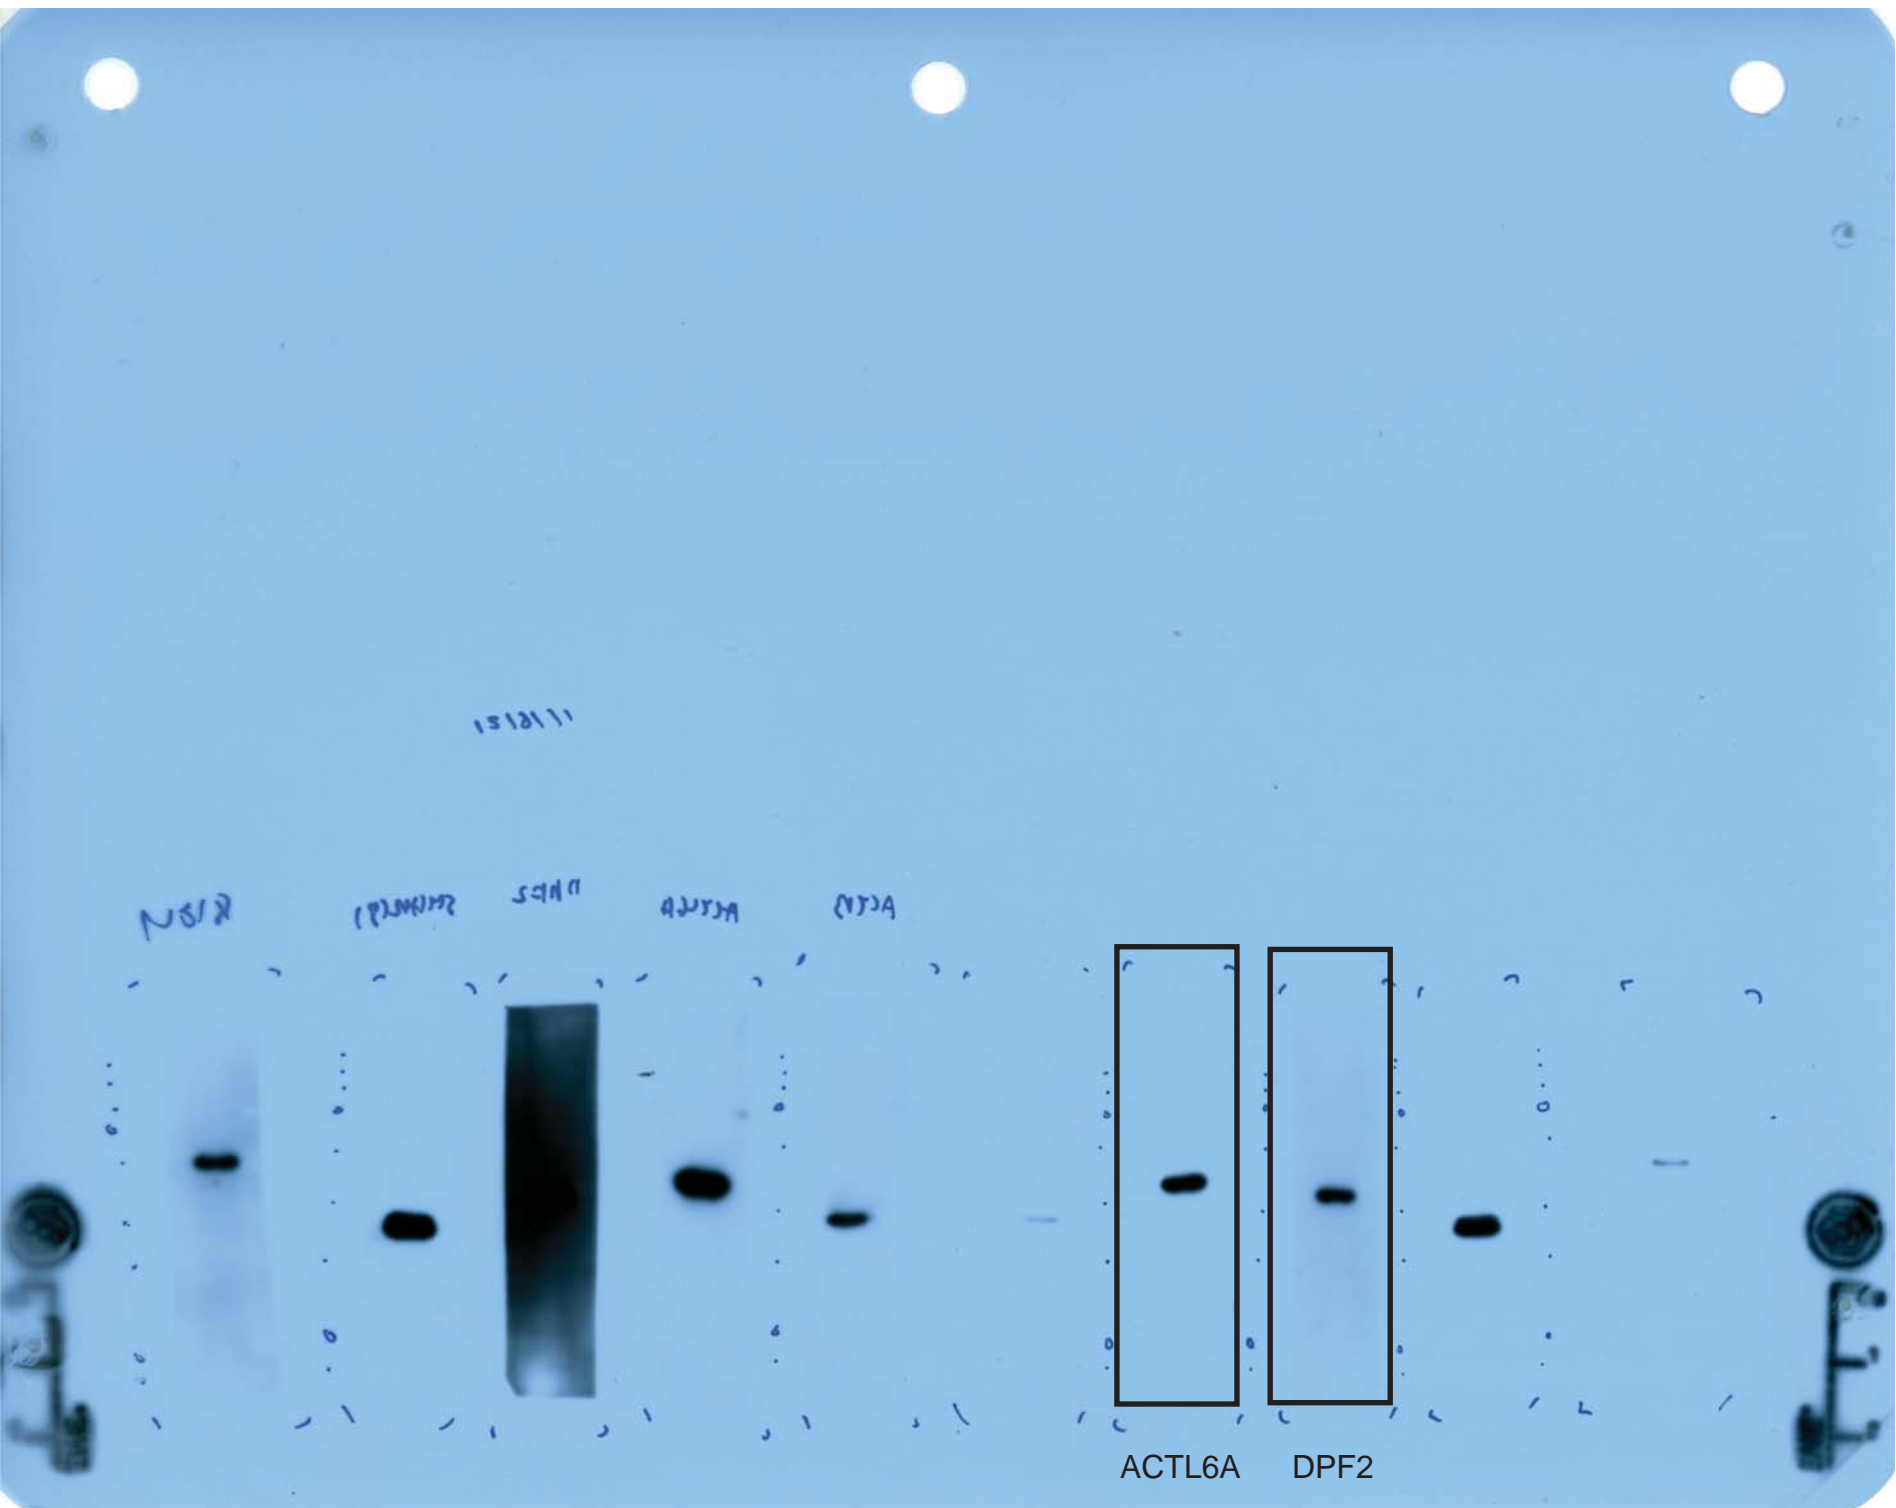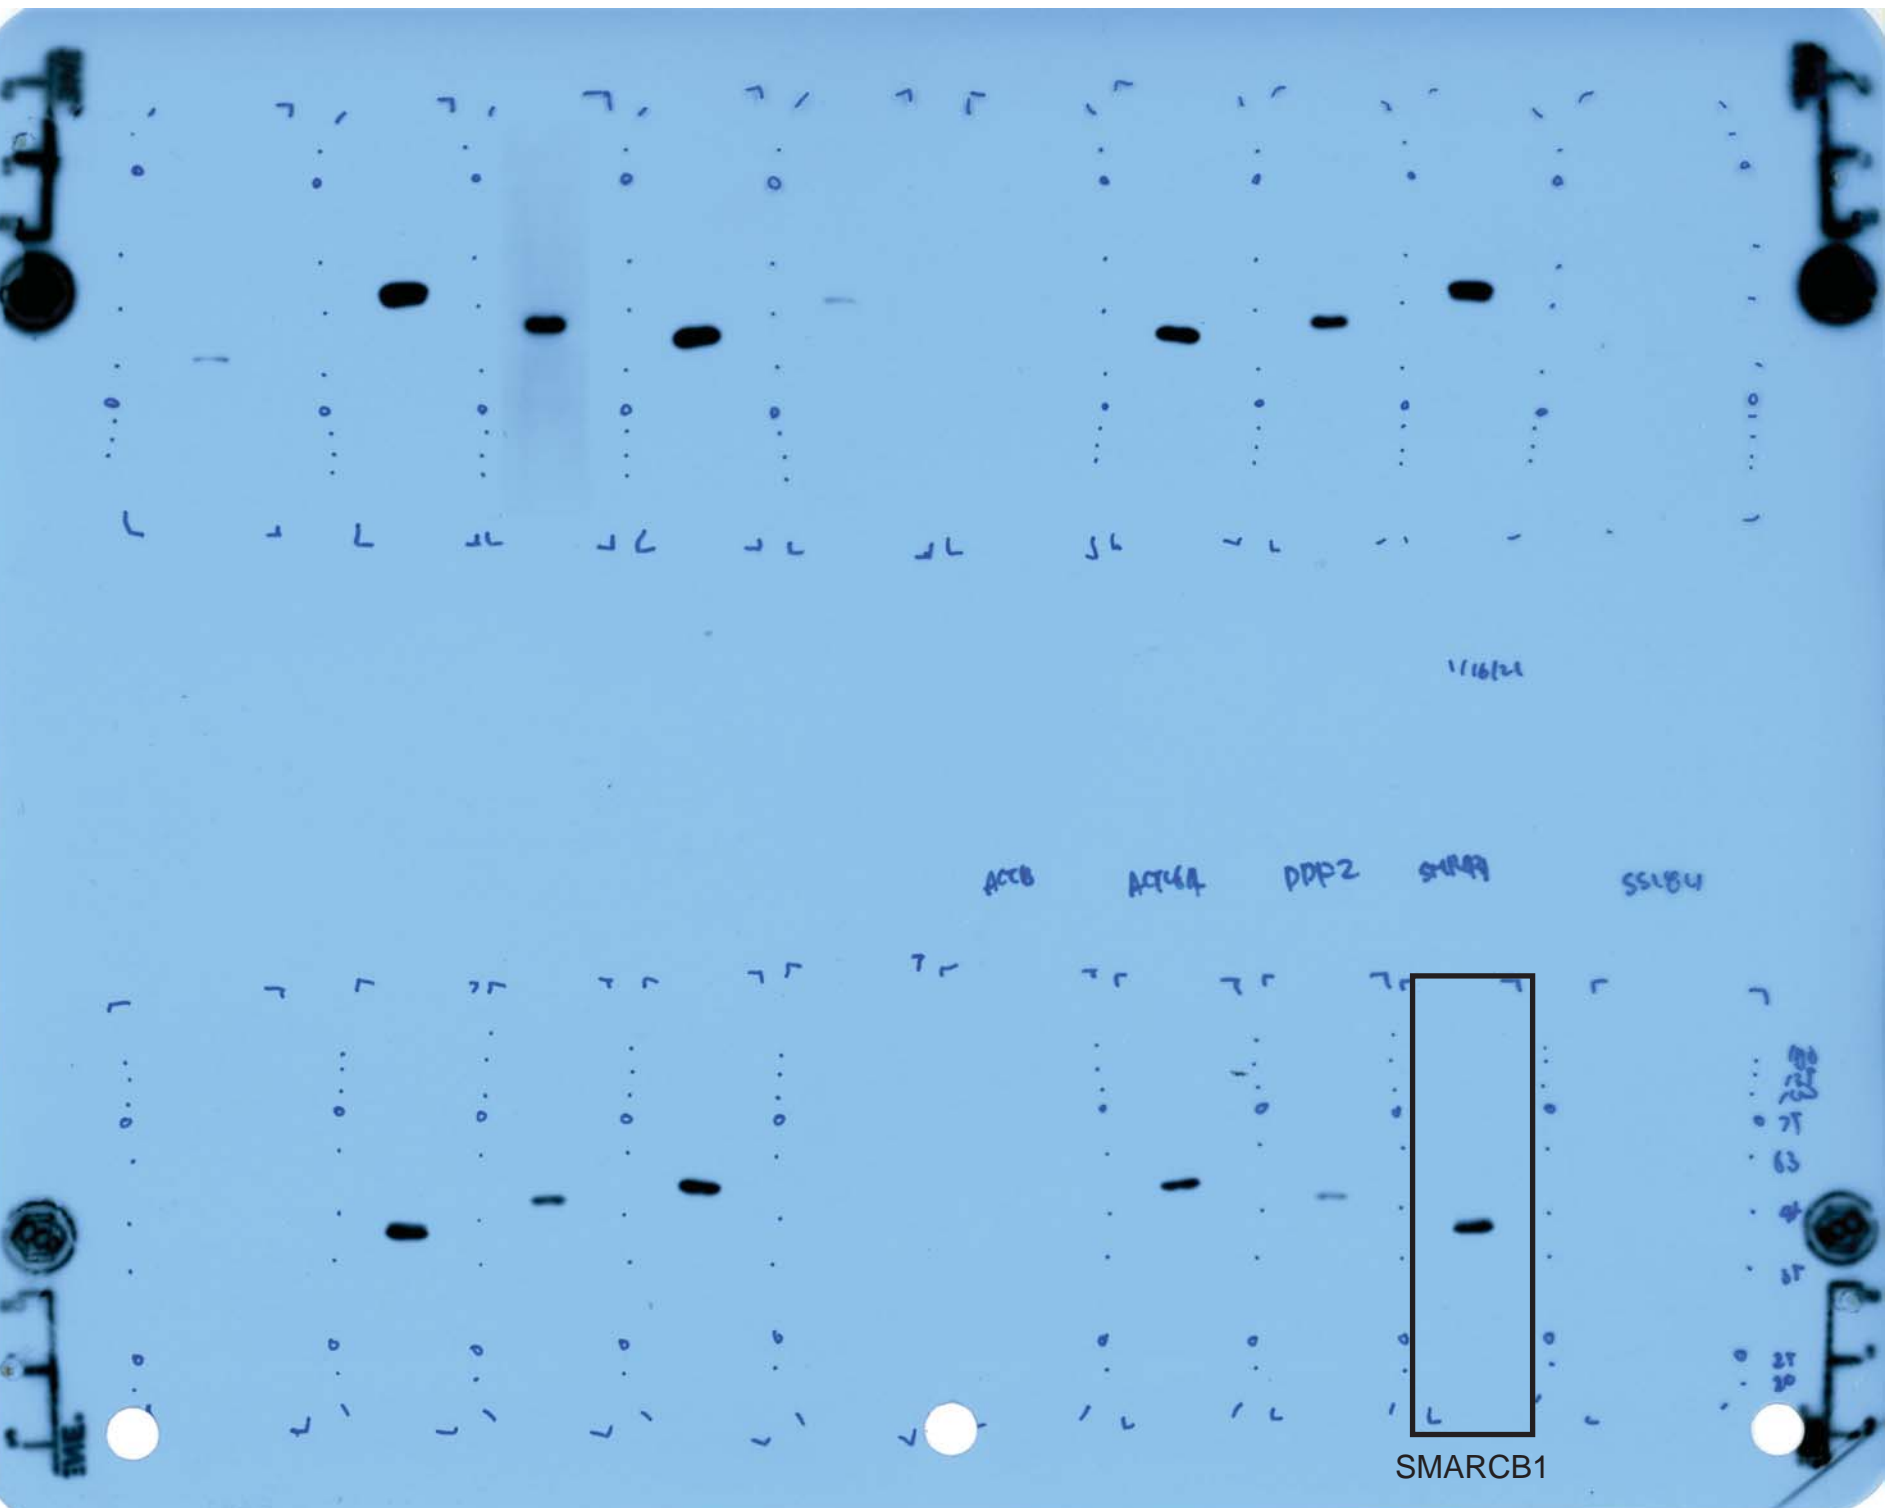

Supplement: fig2-figsupp1-data8 [file elife-73523-fig2-figsupp1-data8-v1.zip]

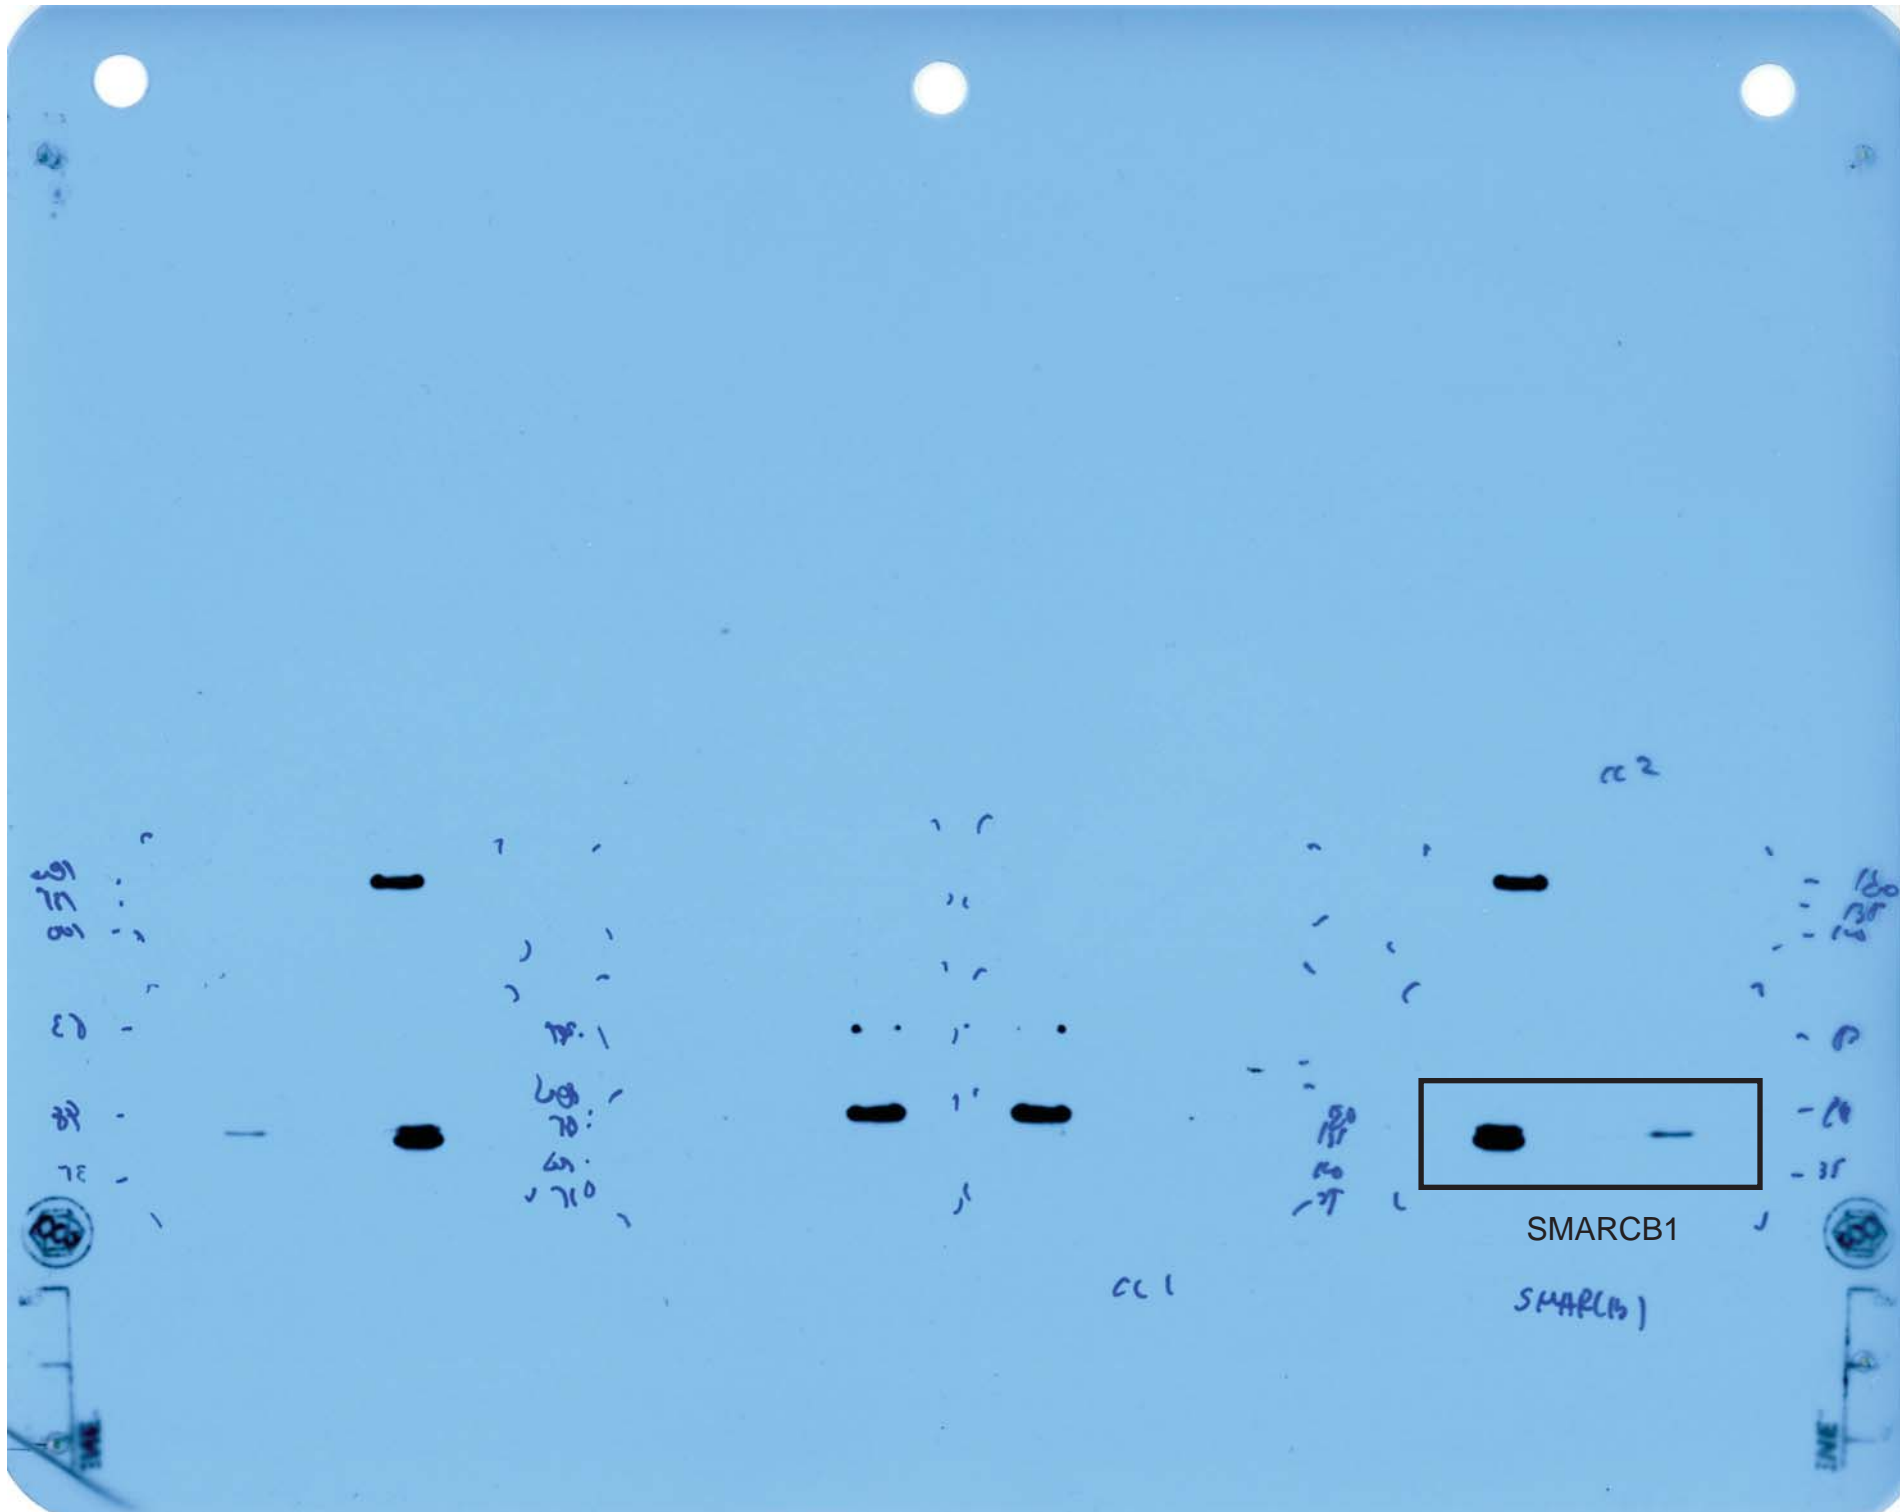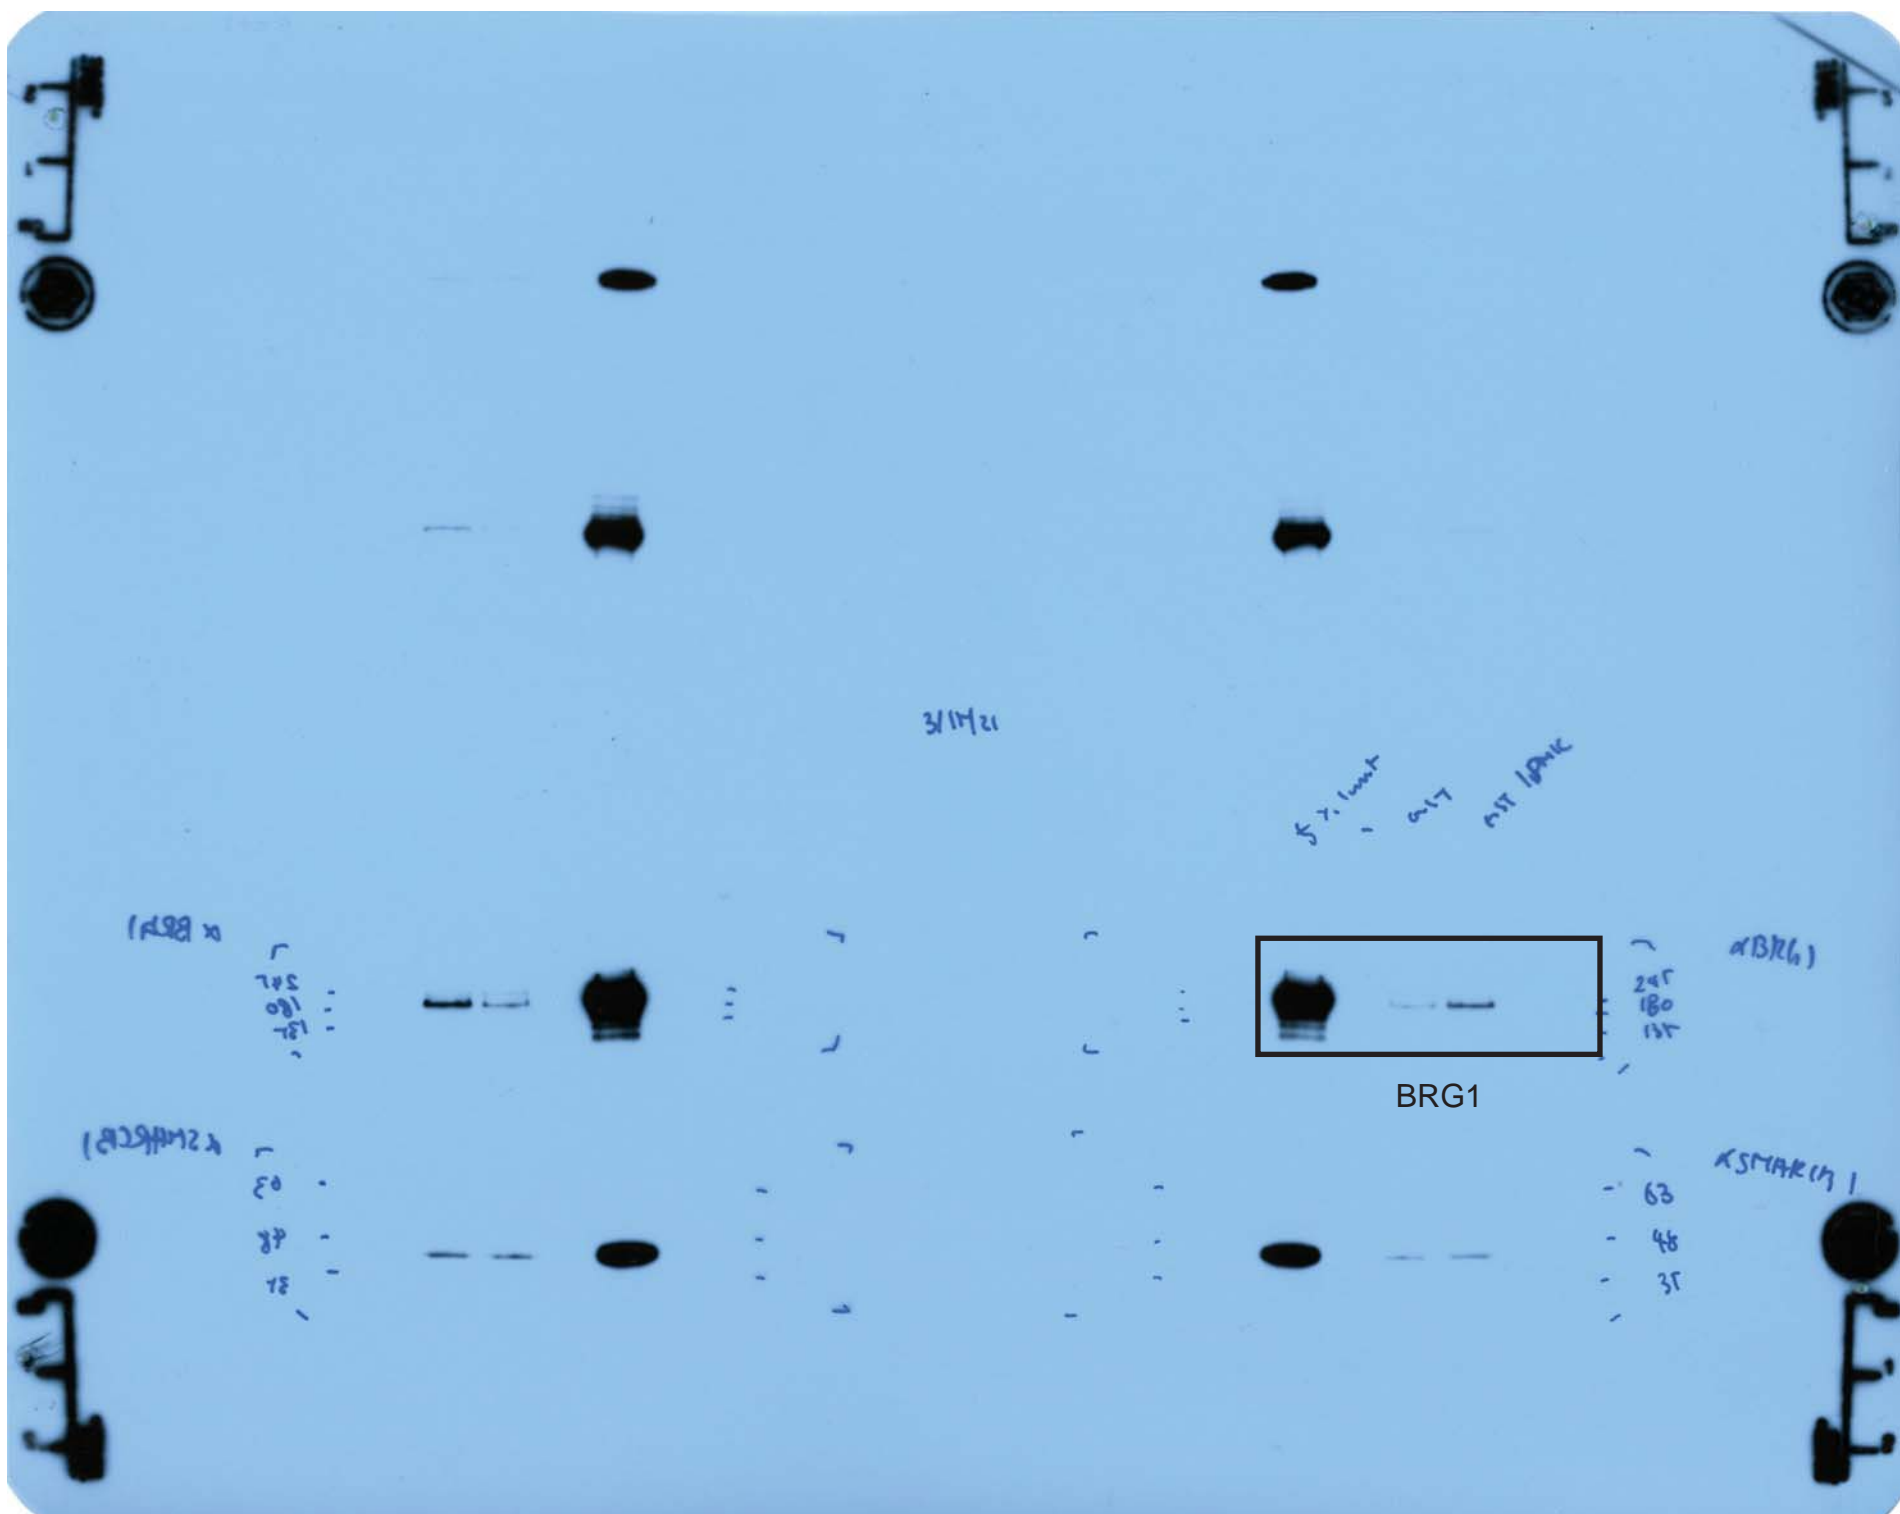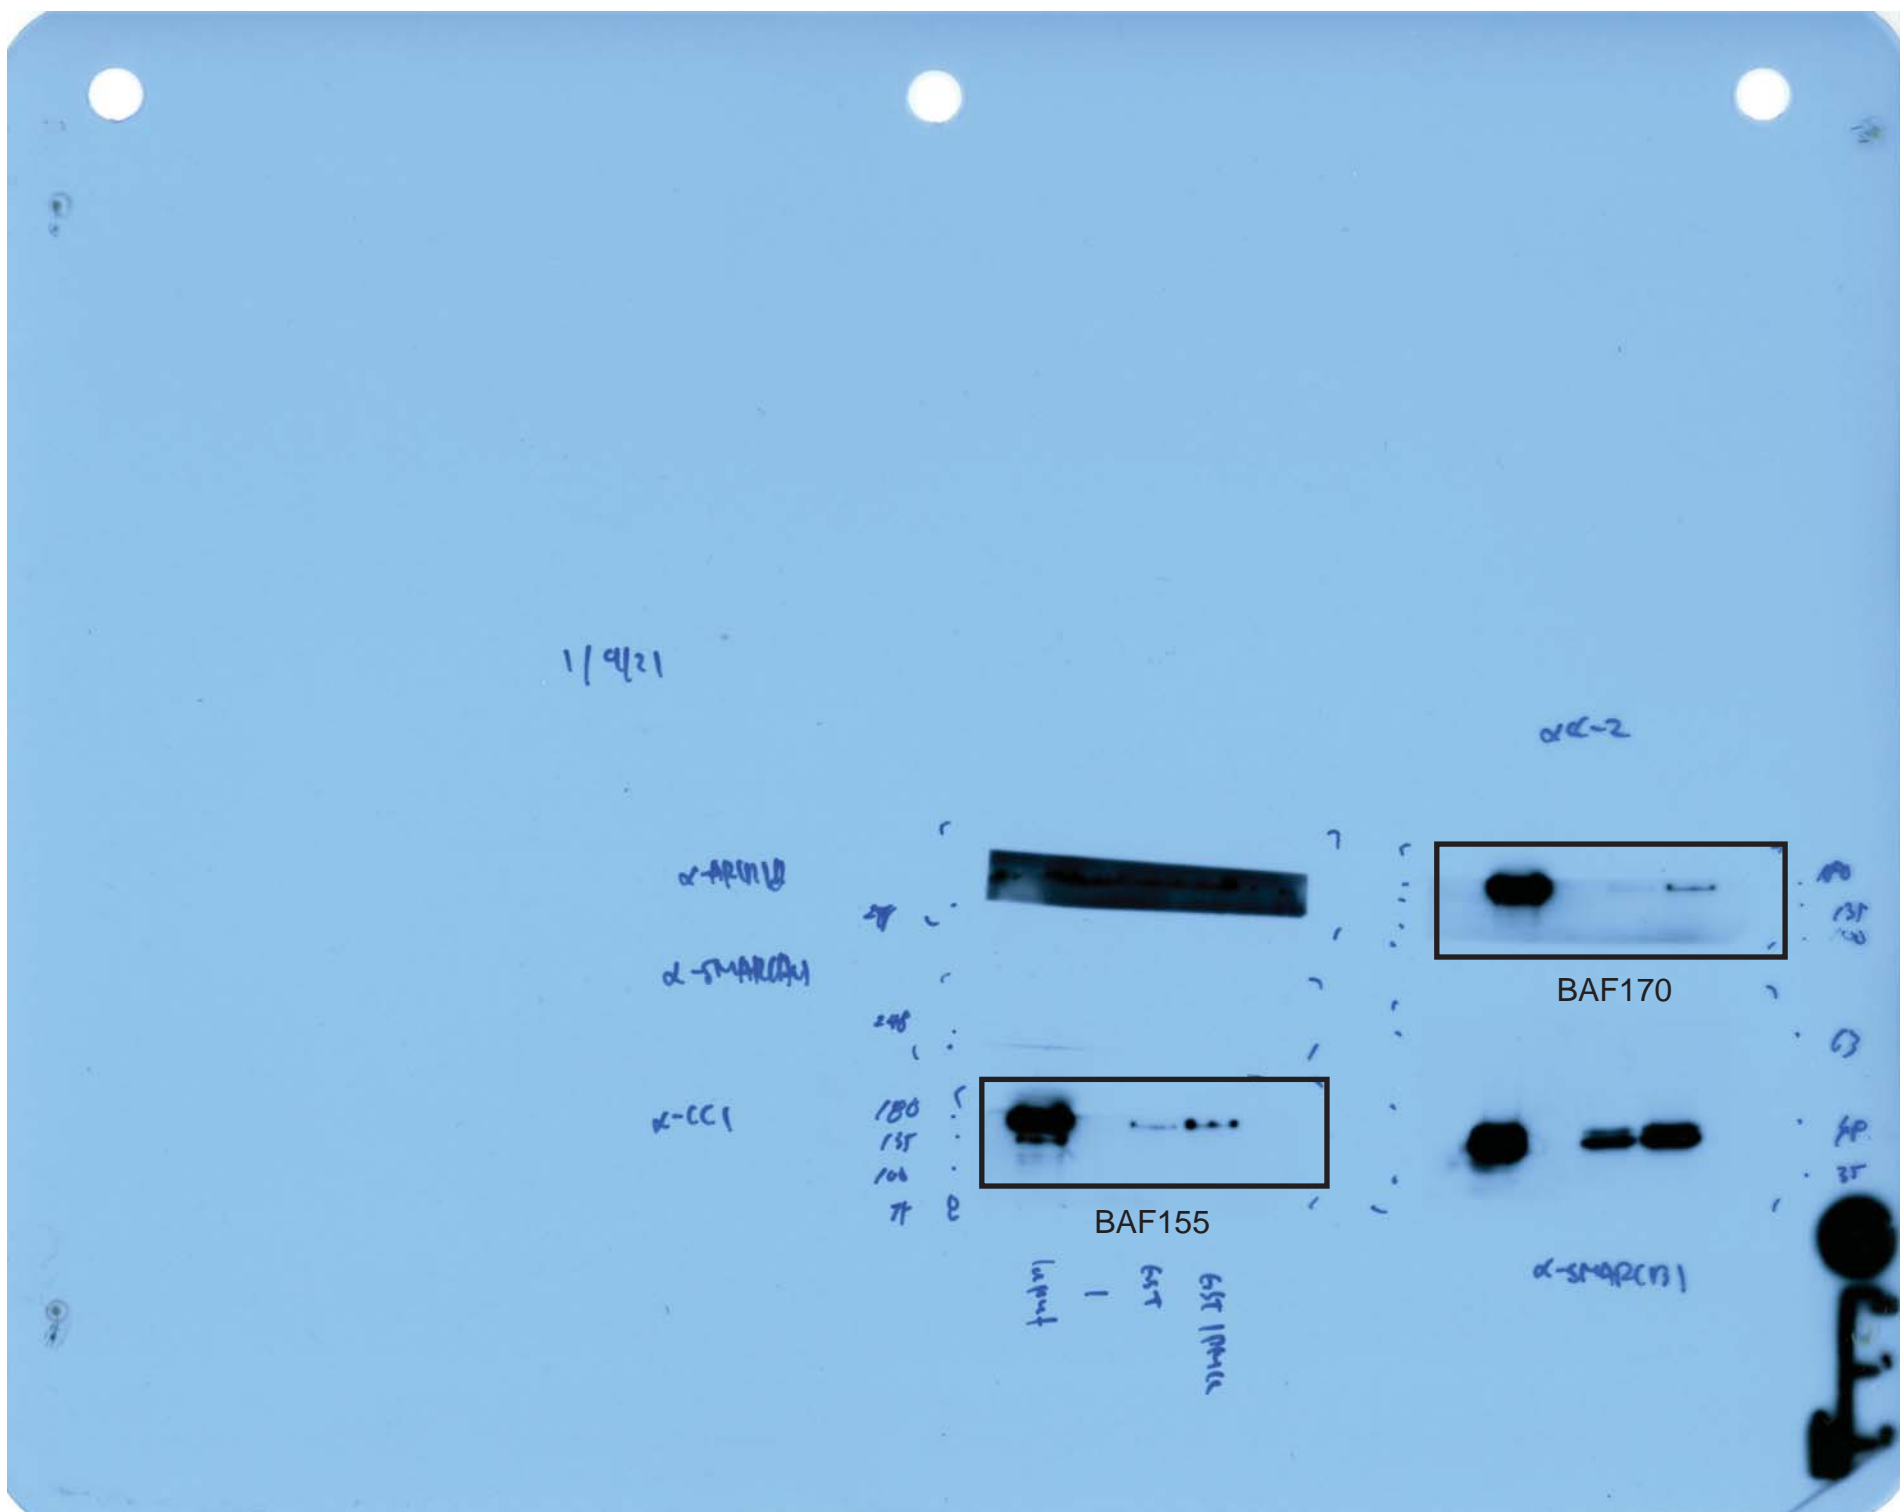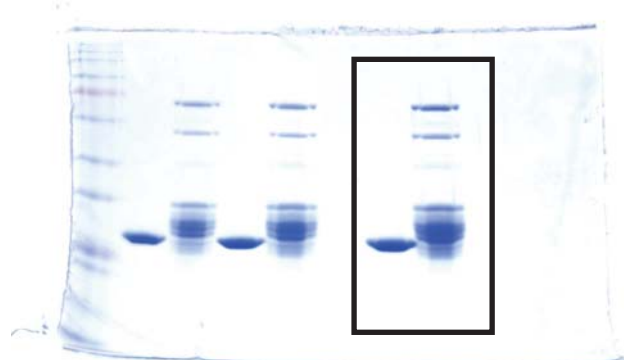

Supplement: fig2-figsupp1-data9 [file elife-73523-fig2-figsupp1-data9-v1.zip]

**B**

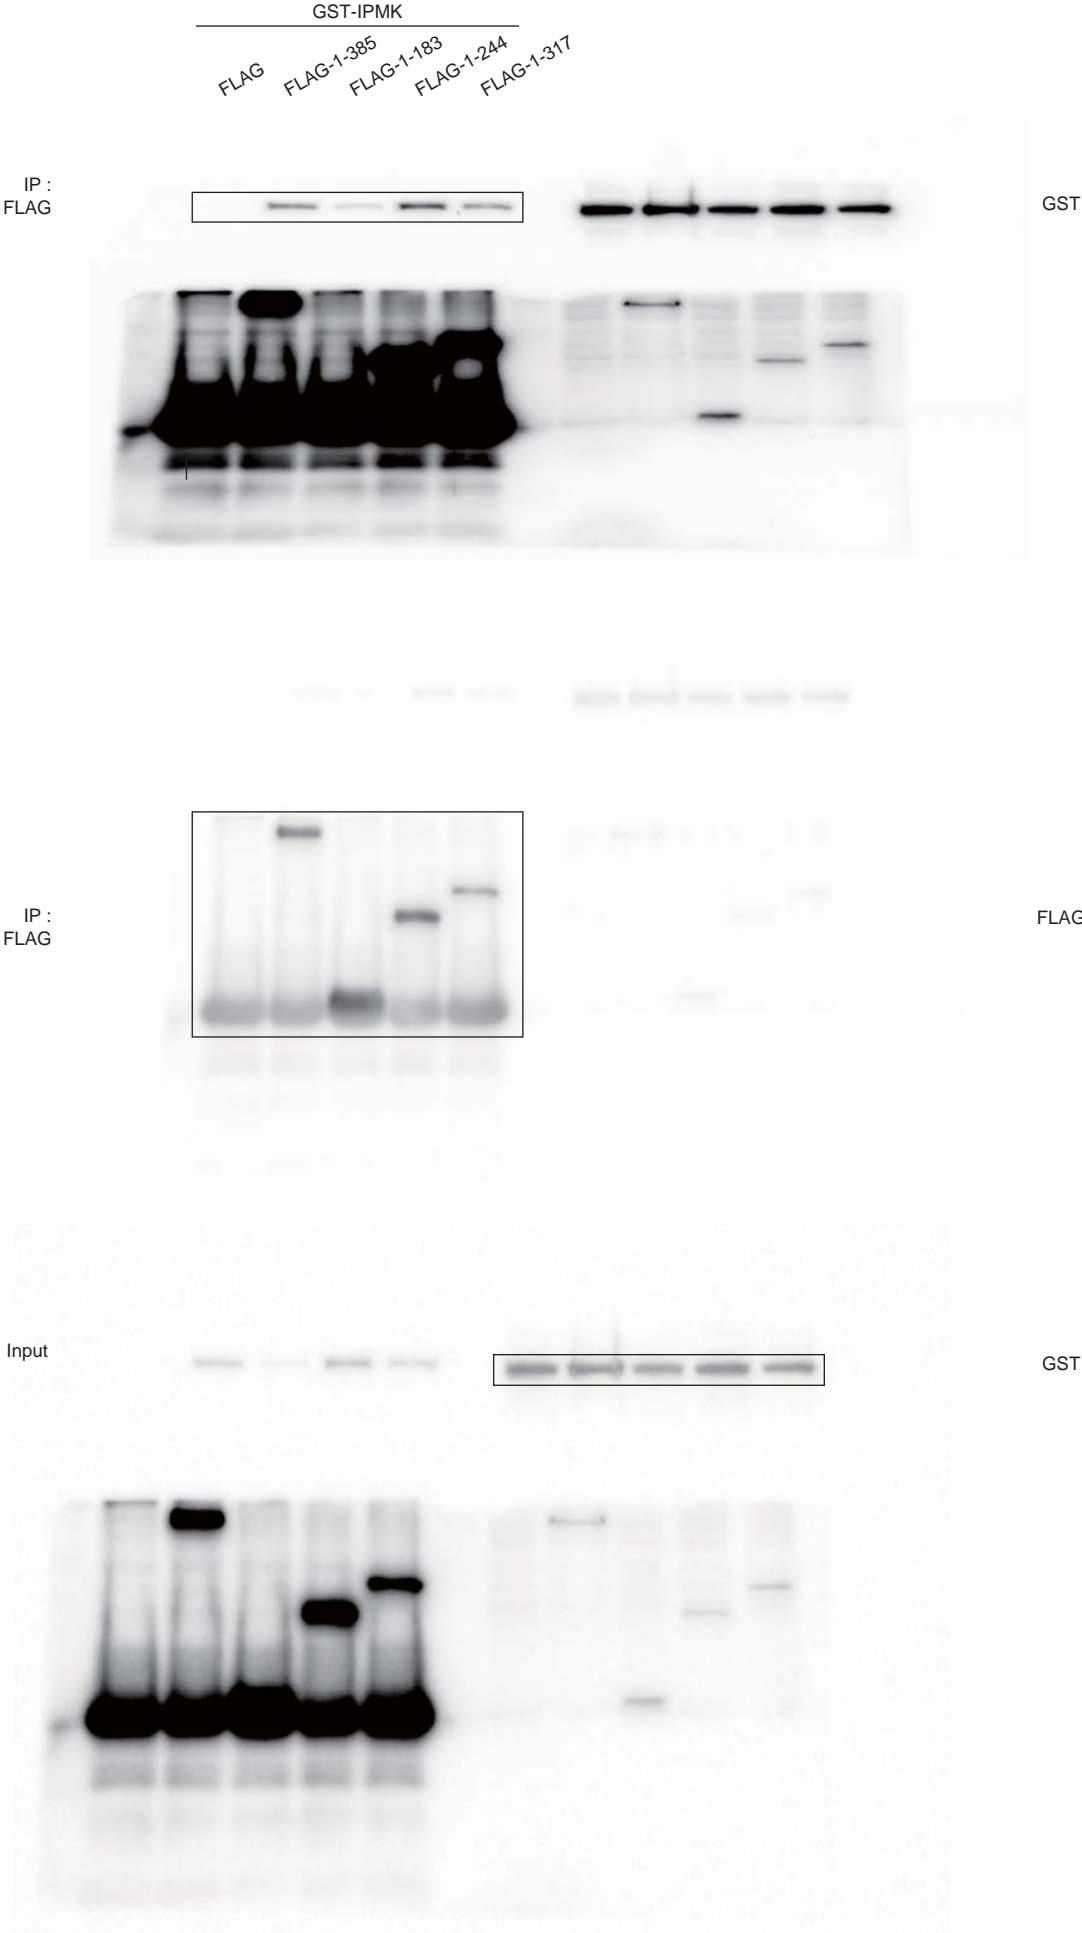

Supplement: fig3-data1 [file elife-73523-fig3-data1-v1.zip]

D

FLAG-IPMK

GST

GST-105-183

GST-186-244

GST-259-317

GST-335-378

GST-1-385

IP :  
FLAG

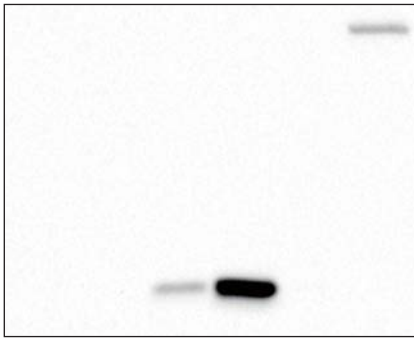

GST

IP :  
FLAG

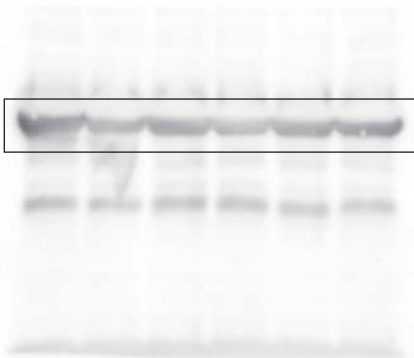

FLAG

Input

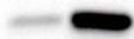

GST

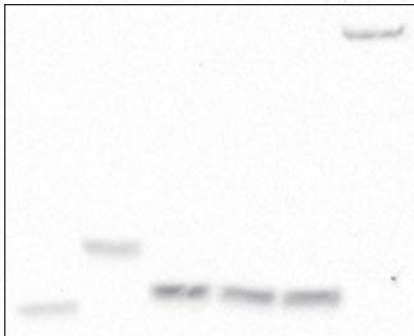

Supplement: fig3-data3 [file elife-73523-fig3-data3-v1.zip]

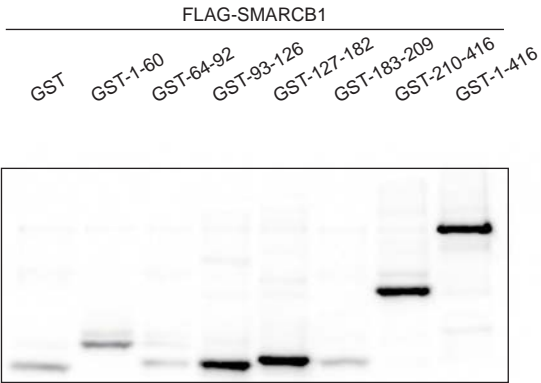

GST

IP :  
FLAG

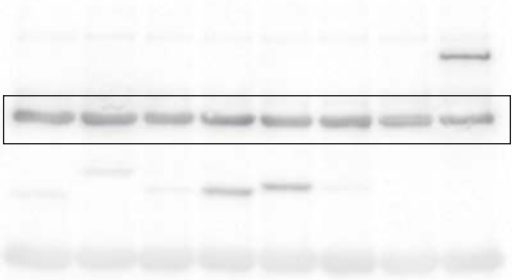

FLAG

Input

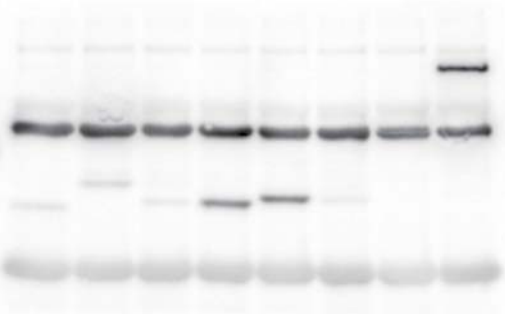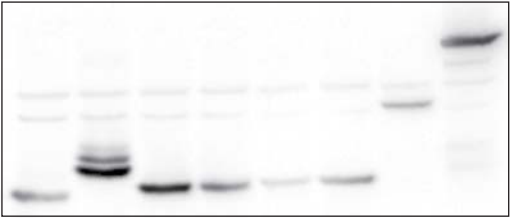

GST

Supplement: fig3-data4 [file elife-73523-fig3-data4-v1.zip]

A

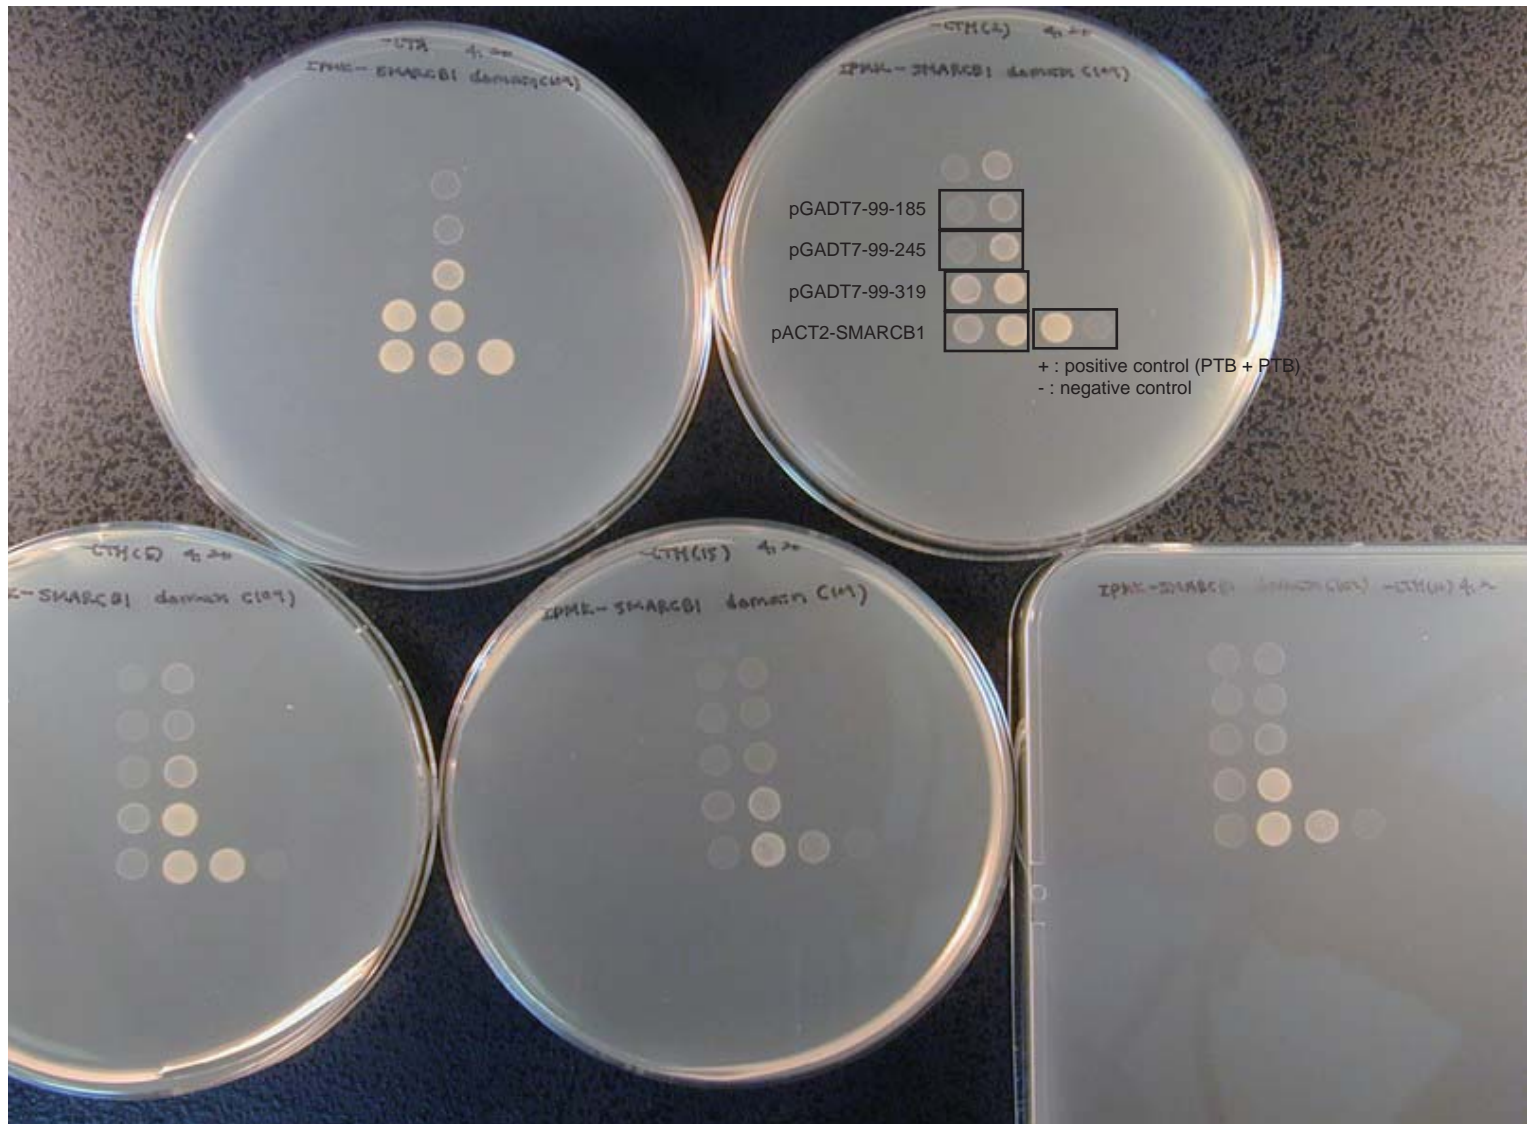

Supplement: fig3-figsupp1-data1 [file elife-73523-fig3-figsupp1-data1-v1.zip]

C

GST GST-259-287 GST-288-317 GST-259-317 GST-1-385

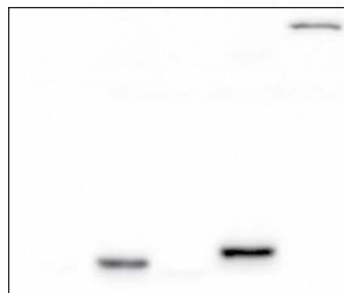

IP :  
FLAG

GST

IP :  
FLAG

FLAG

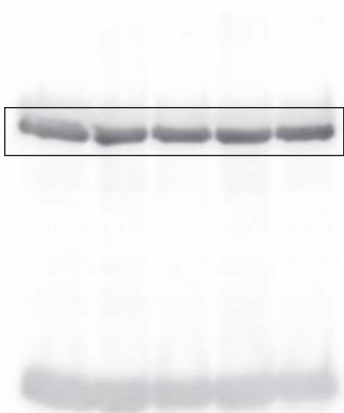

Input

GST

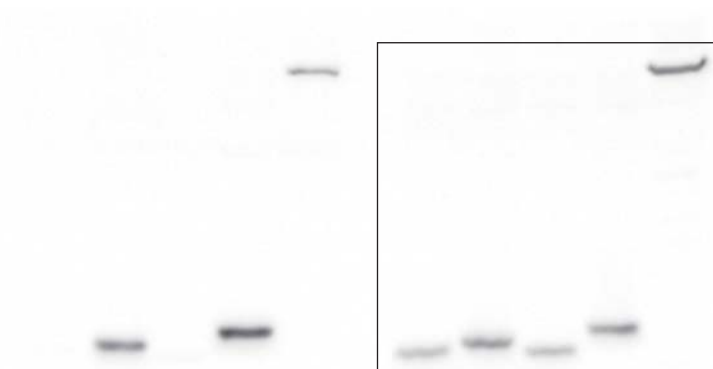

Supplement: fig3-figsupp1-data3 [file elife-73523-fig3-figsupp1-data3-v1.zip]

D

GST GST-211-244 GST-259-287 GST-211-287 GST-1-385

IP :  
FLAG

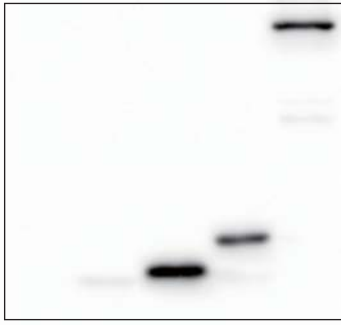

GST

IP :  
FLAG

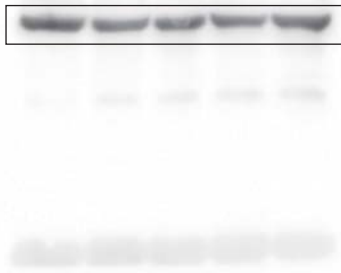

FLAG

Input

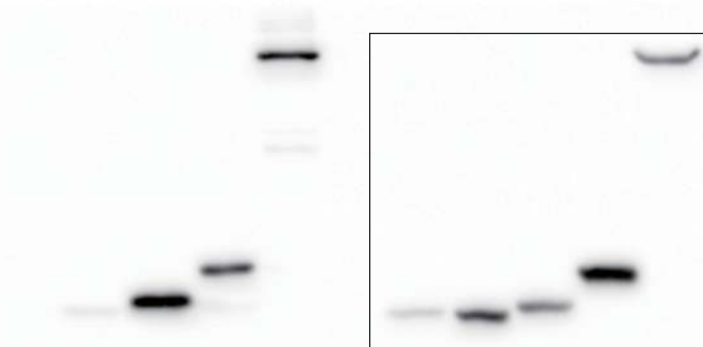

GST

Supplement: fig3-figsupp1-data4 [file elife-73523-fig3-figsupp1-data4-v1.zip]

D

GST GST-Δ186-317 GST-1-385

IP :  
FLAG

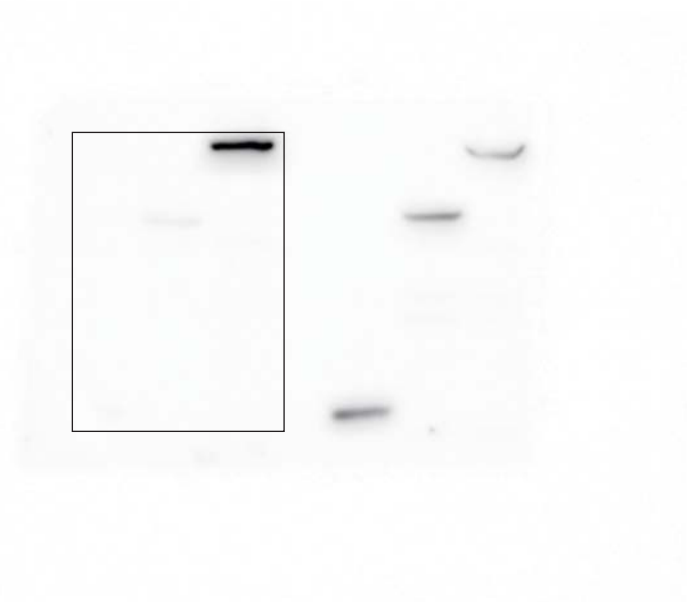

GST

IP :  
FLAG

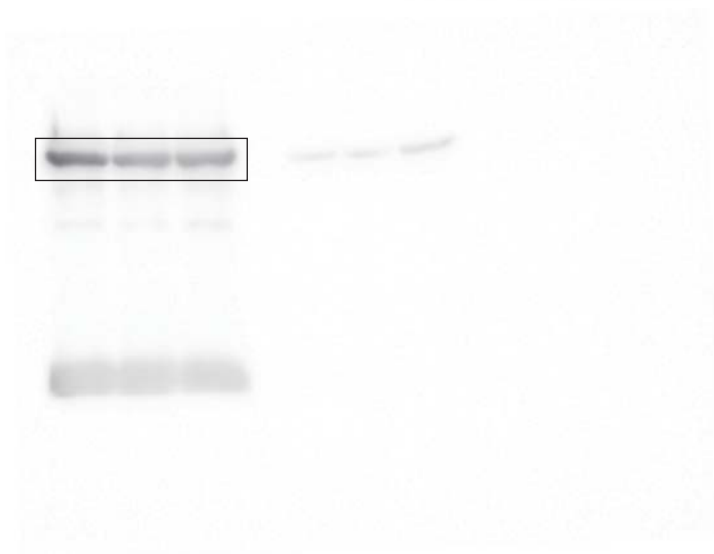

FLAG

Input

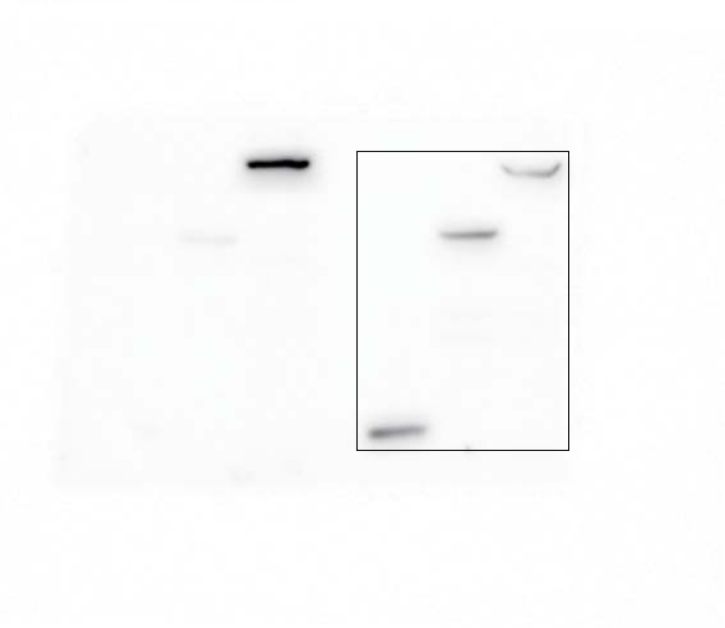

GST

Supplement: fig3-figsupp1-data5 [file elife-73523-fig3-figsupp1-data5-v1.zip]

**A**

|  | Cytoplasm |           | Nucleoplasm |           | Chromatin |           |
|--|-----------|-----------|-------------|-----------|-----------|-----------|
|  | siEgfp    | siSmardb1 | siEgfp      | siSmardb1 | siEgfp    | siSmardb1 |

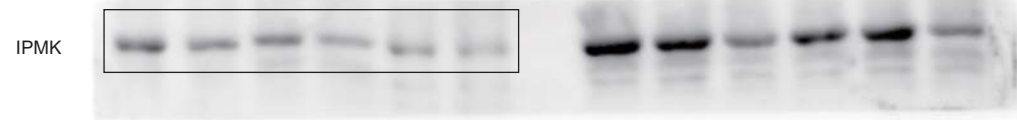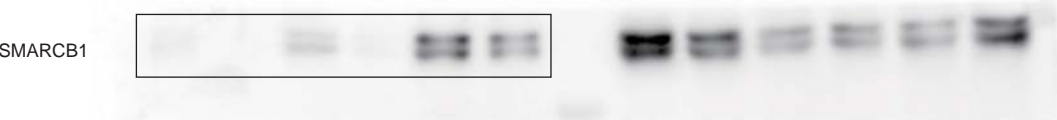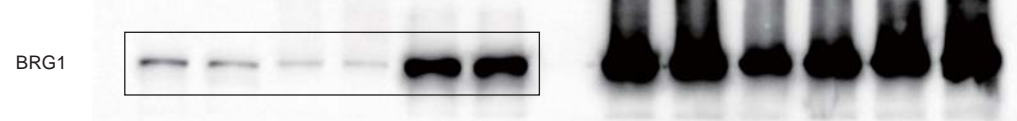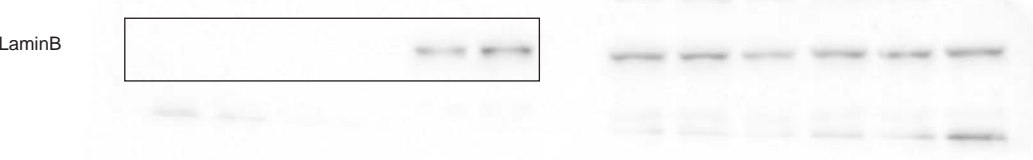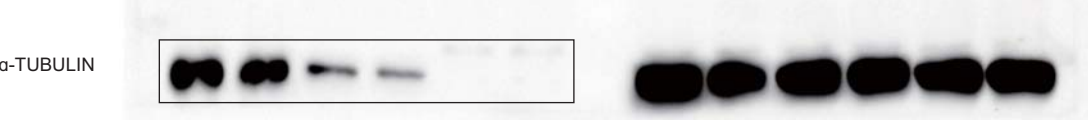

Supplement: fig4-figsupp1-data4 [file elife-73523-fig4-figsupp1-data4-v1.zip]

shNT shipmk1 shipmk2

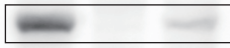

IPMK

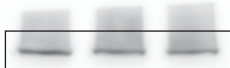

BRG1

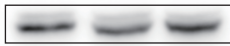

SMARCB1

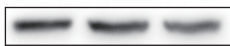

$\alpha$ -TUBULIN

Supplement: fig4-figsupp2-data1 [file elife-73523-fig4-figsupp2-data1-v1.zip]
